# Supplementary material for: Electrochemical‐Induced Ring Transformation of Cyclic α‐(ortho‐Iodophenyl)‐β‐oxoesters
Source: PubMed Central journal article supplement (PMC7155071; doi:10.1002/chem.201905570), 2020-01-30
Supplement: CHEM-26-3222-s001.pdf [file CHEM-26-3222-s001.pdf]

# CHEMISTRY

## A **European** Journal

### Supporting Information

#### **Electrochemical-Induced Ring Transformation of Cyclic $\alpha$ -(*ortho*-iodophenyl)- $\beta$ -oxoesters**

Julia Strehl, Christoph Kahrs, Thomas Müller,\* Gerhard Hilt,\* and Jens Christoffers\*<sup>[a]</sup>

chem\_201905570\_sm\_miscellaneous\_information.pdf  
chem\_201905570\_sm\_transition\_state\_14\_to\_15.gif

## Supporting Information

|                                                                               |     |
|-------------------------------------------------------------------------------|-----|
| 1. General Information                                                        | S2  |
| 2. Electrosynthesis                                                           | S3  |
| 3. $\alpha$ -( <i>ortho</i> -Iodophenylation) of $\beta$ -Oxo Esters <b>1</b> | S12 |
| 4. Synthesis of PIFA Derivatives <b>9</b>                                     | S20 |
| 5. Computational Details                                                      | S22 |
| 6. References                                                                 | S26 |
| 7. NMR-Spectra of all Reported Compounds                                      | S27 |
| 8. GLC of Compounds <b>2a</b> , <b>8</b> and <b>2c–2m</b>                     | S61 |

## 1. General Information

All solvents were commercially available and were distilled under reduced pressure prior to use. DMF was dried over  $\text{CaH}_2$ , distilled and stored over 3 Å molecular sieves. All other solvents were dried over 3 Å molecular sieves. Methyl 1-oxoindane-2-carboxylate (**1e**)<sup>[S1]</sup> and ethyl 1-oxo-1,2,3,4-tetrahydronaphthalene-2-carboxylate (**1f**)<sup>[S1]</sup> were prepared according to literature procedures. All other starting materials or reagents were purchased from commercial suppliers without further purification. If water or air sensitive compounds were used, the experiments were carried out in heat dried glassware using conventional Schlenk techniques under nitrogen atmosphere. Electrochemical reactions were carried out using an AIM-TTI Instruments MX100T power supply. These reactions were performed in a divided H-type cell (Figure S1), equipped with stirring bars, septums, inert gas supply and a  $\text{CuSn}_{17}\text{Pb}$  cathode (4.7  $\text{cm}^2$ ) and a graphite anode (3.5  $\text{cm}^2$ ).

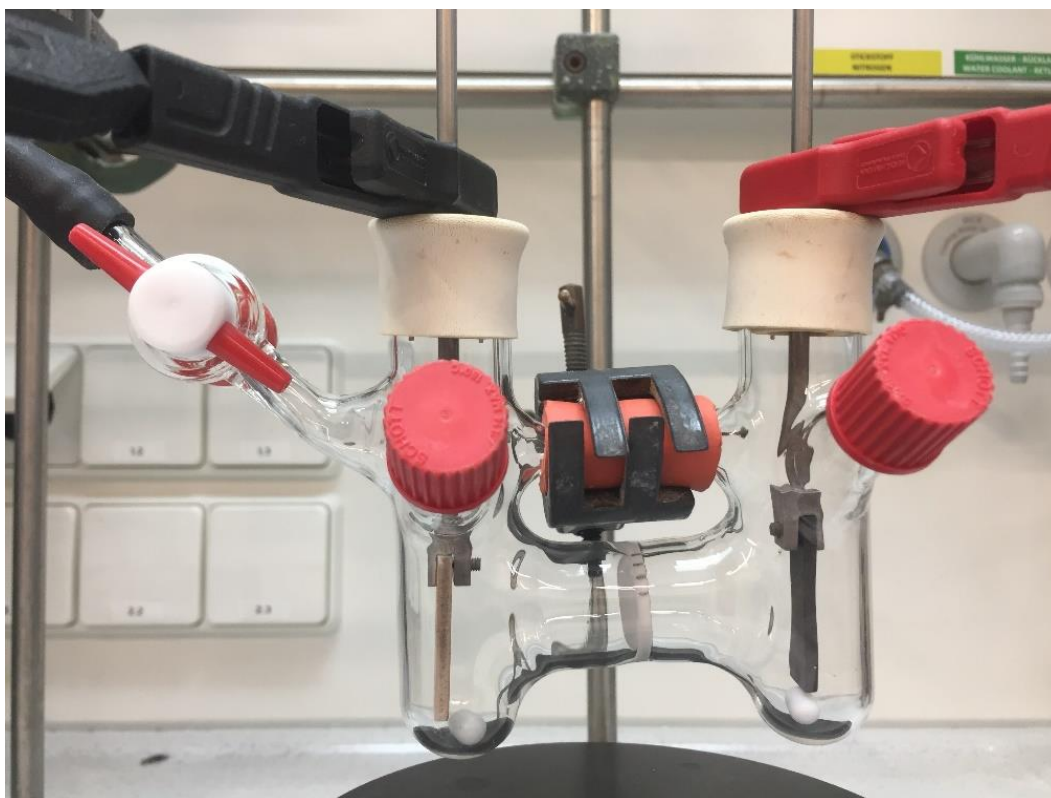

**Figure S1.** H-type electrolysis cell, divided by a glass frit (G4); left:  $\text{CuSn}_{17}\text{Pb}$  cathode; right: graphite anode.

NMR spectra were recorded on Bruker Avance 300 (300 MHz), Avance III (500 MHz) or Avance DRX (500 MHz) instruments. Chemical shifts were reported in parts per million (ppm). The spectra were referenced to residual solvent peaks. The IR spectra were obtained with a Shimadzu IRSpirit with a QATR-S cell. The wave numbers  $\lambda^{-1}$  were quoted in recipro-

cal centimeters (cm<sup>-1</sup>). MS and HRMS spectra of products were obtained with a Waters Q-TOF Premier (ESI, pos. mode) or Thermo Scientific DFS (EI) spectrometers.

Flash column chromatography was carried out using Machery-Nagel SiO<sub>2</sub> 60 (40–63 μm). Thin layer chromatography was carried out on Merck TLC plates coated with SiO<sub>2</sub> 60 F<sub>254</sub> with fluorescence indicator.

## 2. Electrosynthesis

### 2.1 Optimization of the Reaction Conditions

**Table S1.** Optimization of the reaction conditions.

| Entry                         | variation from initial conditions <sup>[b]</sup> | Yield of <b>2a</b> <sup>[c]</sup> |
|-------------------------------|--------------------------------------------------|-----------------------------------|
| screening of conductive salts |                                                  |                                   |
| 1                             | <i>n</i> Bu <sub>4</sub> NBr                     | 55%                               |
| 2                             | <i>n</i> Bu <sub>4</sub> NClO <sub>4</sub>       | 54%                               |
| 3                             | Et <sub>4</sub> NOTos                            | 52%                               |
| 4                             | <i>n</i> Bu <sub>4</sub> NPF <sub>6</sub>        | 40%                               |
| 5                             | LiClO <sub>4</sub>                               | 17%                               |
| 6                             | <i>n</i> Bu <sub>4</sub> NBF <sub>4</sub>        | 51%                               |
| electrode materials           |                                                  |                                   |
| 7                             | graphite cathode                                 | 14%                               |
| 8                             | glassy carbon cathode                            | 0%                                |
| 9                             | Cu cathode                                       | 7%                                |
| 10                            | Pt cathode                                       | 0%                                |
| 11                            | Pb cathode <sup>[d]</sup>                        | 67%                               |
| 11                            | glassy carbon anode                              | 43%                               |
| 12                            | Pt anode                                         | 31%                               |

**Table S1** continued.

| additives        |                                                   |                 |
|------------------|---------------------------------------------------|-----------------|
| 13               | no additive                                       | 0%              |
| 14               | Ti(OEt) <sub>4</sub>                              | 29%             |
| 15               | CeCl <sub>3</sub>                                 | 17%             |
| 16               | ZnCl <sub>2</sub>                                 | 20%             |
| 17               | LaCl <sub>3</sub>                                 | 5%              |
| 18               | BF <sub>3</sub> · OEt <sub>2</sub> <sup>[d]</sup> | 52%             |
| 19               | TMSOTf <sup>[d]</sup>                             | 64%             |
| 20               | TiCl <sub>4</sub> <sup>[d]</sup>                  | 0%              |
| 21               | AlCl <sub>3</sub> <sup>[d]</sup>                  | 51%             |
| 22               | InBr <sub>3</sub> <sup>[d]</sup>                  | 0%              |
| 23               | ZnI <sub>2</sub> <sup>[d]</sup>                   | 39%             |
| electric current |                                                   |                 |
| 24               | <b><i>I</i> = 8 mA</b>                            | <b>72%</b>      |
| 25               | <i>I</i> = 6.5 mA or 5 mA                         | 71%             |
| 26               | <i>I</i> = 2.5 mA                                 | 43%             |
| solvents         |                                                   |                 |
| 27               | 1,4-dioxane                                       | no conductivity |
| 28               | DMPU                                              | 29%             |
| 29               | NMP                                               | 40%             |
| 30               | THF                                               | no conductivity |
| 31               | DMA <sup>[d]</sup>                                | 0%              |

[a] Reactions were performed in a divided cell on a 0.25 mmol scale with a substrate concentration of 36 mmol L<sup>-1</sup>. [b] Initial conditions: 3.0 equiv. TMSCl, 0.3 mol L<sup>-1</sup> *n*Bu<sub>4</sub>Br, DMF, 23°C, 10 mA, 2.0 F mol<sup>-1</sup>, CuSn<sub>17</sub>Pb (leaded bronze) cathode, graphite anode. [c] Yield determined by GLC of the unpurified reaction mixture with mesitylene as internal standard. [d] Performed at 8 mA.

## 2.2 General procedure A (GPA) for the electrochemical conversion of *ortho*-iodophenyl compounds **5**

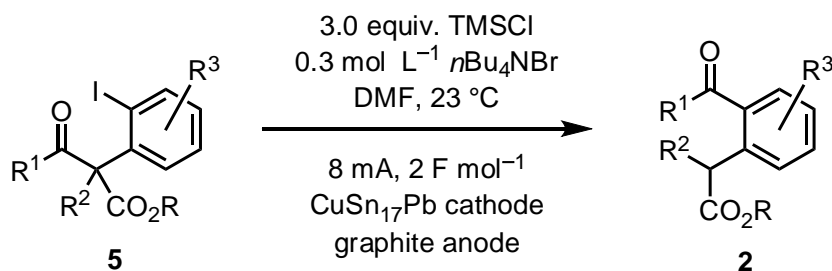

First of all, *n*Bu<sub>4</sub>NBr (677 mg, 2.10 mmol) was weighed into each chamber of the cell. The reaction tube was then evacuated, refilled with inert gas, and *abs.* DMF [7 mL/chamber,  $c(n\text{Bu}_4\text{NBr}) = 0.3 \text{ mol L}^{-1}$ ] was added to each chamber. Subsequently, TMSCl (3.0 equiv.) and the corresponding  $\alpha$ -(*ortho*-iodophenyl)- $\beta$ -oxoester **5** (1.0 equiv.) were added into the cathodic chamber and the reaction mixture was electrolyzed under constant current (8 mA, 2.0 F mol<sup>-1</sup>). The reaction mixture was diluted with sat. aq. NH<sub>4</sub>Cl solution (40 mL) and extracted with Et<sub>2</sub>O (3 × 20 mL). The combined organic layers were dried (MgSO<sub>4</sub>) and filtered. After evaporation, the residue was submitted to column chromatography to furnish the respective products **2**.

## 2.3 Ethyl 9-Oxo-6,7,8,9-tetrahydro-5*H*-benzocycloheptene-5-carboxylate (**2a**)

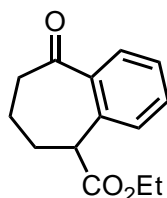

(1) According to GPA, oxoester **5a** (90 mg, 0.25 mmol) and TMSCl (82 mg, 0.75 mmol) were converted to furnish product **2a** (42 mg, 0.18 mmol, 72%) as colorless oil after column chromatography (SiO<sub>2</sub>, *n*-pentane/Et<sub>2</sub>O 5:1,  $R_f = 0.20$ ).

(2) Fourfold scale: First of all, *n*Bu<sub>4</sub>NBr (1.35 g, 4.2 mmol) was weighed into each chamber of the cell. The reaction tube was then evacuated, refilled with inert gas, and *abs.* DMF [14 mL/chamber,  $c(n\text{Bu}_4\text{NBr}) = 0.3 \text{ mol L}^{-1}$ ] was added to each chamber. Subsequently, TMSCl (326 mg, 3.00 mmol) and the corresponding oxoester **5a** (358 mg, 1.00 mmol) were added into the cathodic chamber and the reaction mixture was electrolyzed under constant current (8 mA, 2.0 F mol<sup>-1</sup>). The reaction mixture was diluted with sat. aq. NH<sub>4</sub>Cl solution (60 mL) and extracted with Et<sub>2</sub>O (3 × 25 mL). The combined organic layers were dried (MgSO<sub>4</sub>) and filtered. After evaporation, the residue was submitted to column chromatography (SiO<sub>2</sub>, *n*-pentane/Et<sub>2</sub>O 5:1,  $R_f = 0.20$ ) to furnish the product **2a** (129 mg, 0.56 mmol, 56%) as colorless oil.

(3) By iodine-metal exchange reaction: LiCl (31 mg, 0.73 mmol) was dried under high vacuum at 100 °C for 1 h. Under nitrogen atmosphere and at 0 °C, *i*PrMgCl (2 mol L<sup>-1</sup> in THF, 0.31 mL, 0.62 mmol) was added dropwise. After stirring for 30 min, anhydrous THF (2 mL) was added. At -40 °C, a solution of oxoester **5a** (0.20 g, 0.56 mmol) in anhydrous THF (5 mL) was added dropwise. The mixture was warmed up to ambient temperature and further stirred for 18 h, then hydrochloric acid (1 mol L<sup>-1</sup>, 10 mL) was added. The mixture was extracted with MTBE (3 x 20 mL). The combined organic layers were dried (MgSO<sub>4</sub>) and filtered. The solvent was removed *in vacuo* and the crude product purified by column chromatography (SiO<sub>2</sub>, hexanes/MTBE 1:1, R<sub>f</sub> = 0.42) to give compound **2a** (22 mg, 95 μmol, 17%) as a colorless oil.

<sup>1</sup>H NMR (300 MHz, CDCl<sub>3</sub>): δ = 7.64 (dd, *J* = 7.6 Hz, *J* = 1.4 Hz, 1 H), 7.44 (dt, *J* = 7.5 Hz, *J* = 1.5 Hz, 1 H), 7.35 (dt, *J* = 7.5 Hz, *J* = 1.5 Hz, 1 H), 7.17 (d, *J* = 7.6 Hz, 1 H), 4.24–4.13 (m, 2 H), 3.99 (dd, *J* = 7.6 Hz, *J* = 5.5 Hz, 1 H), 2.80–2.69 (m, 1 H), 2.66–2.55 (m, 1 H), 2.42–2.31 (m, 1 H), 2.12–2.00 (m, 1 H), 1.90–1.77 (m, 2 H), 1.22 (t, *J* = 7.1 Hz, 3 H) ppm. <sup>13</sup>C{<sup>1</sup>H} NMR (125 MHz, CDCl<sub>3</sub>): δ = 206.0 (C), 173.3 (C), 139.7 (C), 136.7 (C), 132.0 (CH), 128.78 (CH), 128.76 (CH), 127.8 (CH), 61.3 (CH<sub>2</sub>), 49.0 (CH), 41.0 (CH<sub>2</sub>), 28.5 (CH<sub>2</sub>), 20.4 (CH<sub>2</sub>), 14.2 (CH<sub>3</sub>) ppm. The spectroscopic data are in accordance with literature values.<sup>[S2]</sup>

#### 2.4 Ethyl 2-oxo-1-phenylcyclohexane-1-carboxylate (**8**)

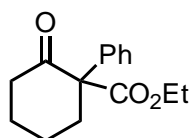

According to GPA, oxoester **5b** (155 mg, 0.420 mmol) and TMSCl (136 mg, 1.25 mmol) were converted to furnish product **8** (18 mg, 73 μmol, 7%) as colorless oil after column chromatography (SiO<sub>2</sub>, *n*-pentane/Et<sub>2</sub>O 5:1, R<sub>f</sub> = 0.37). <sup>1</sup>H NMR (500 MHz, CDCl<sub>3</sub>): δ = 7.38–7.34 (m, 2 H), 7.32–7.28 (m, 1 H), 7.25–7.21 (m, 2 H), 4.26–4.18 (m, 2 H), 2.80–2.74 (m, 1 H), 2.60–2.54 (m, 2 H), 2.40–2.32 (m, 1 H), 2.03–1.95 (m, 1 H), 1.86–1.77 (m, 3 H), 1.23 (t, *J* = 7.1 Hz, 3 H) ppm. <sup>13</sup>C{<sup>1</sup>H} NMR (125 MHz, CDCl<sub>3</sub>): δ = 206.8 (C), 171.4 (C), 136.9 (C), 128.5 (2 CH), 127.9 (2 CH), 127.7 (CH), 66.6 (C), 61.8 (CH<sub>2</sub>), 41.0 (CH<sub>2</sub>), 35.5 (CH<sub>2</sub>), 27.8 (CH<sub>2</sub>), 22.3 (CH<sub>2</sub>), 14.1 (CH<sub>3</sub>) ppm. The spectroscopic data are in accordance with literature values.<sup>[S3]</sup>

## 2.5 Methyl 11-oxo-6,7,8,9,10,11-hexahydro-5H-benzocyclononene-5-carboxylate (**2c**)

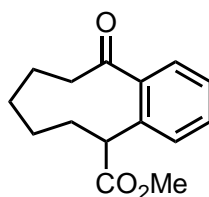

According to GPA, oxoester **5c** (186 mg, 0.500 mmol) and TMSCl (163 mg, 1.50 mmol) were converted to furnish product **2c** (78 mg, 0.32 mmol, 64%) as colorless oil after column chromatography (SiO<sub>2</sub>, *n*-pentane/EtOAc 20:1, R<sub>f</sub> = 0.18). <sup>1</sup>H NMR (500 MHz, CDCl<sub>3</sub>): δ = 7.39–7.34 (m, 1 H), 7.31–7.27 (m, 2 H), 7.23–7.27 (m, 1 H), 3.95 (dd, *J* = 11.8 Hz, *J* = 4.5 Hz, 1 H), 3.66 (s, 3 H), 2.93–2.86 (m, 1 H), 2.82–2.75 (m, 1 H), 2.05–1.96 (m, 1 H), 1.93–1.83 (m, 2 H), 1.70–1.58 (m, 2 H), 1.58–1.48 (m, 1 H), 1.40–1.30 (m, 1 H), 1.13–1.02 (m, 1 H) ppm. <sup>13</sup>C{<sup>1</sup>H} NMR (125 MHz, CDCl<sub>3</sub>): δ = 211.3 (C), 174.4 (C), 143.2 (C), 134.8 (C), 130.1 (CH), 127.8 (CH), 127.1 (CH), 124.8 (CH), 52.2 (CH<sub>3</sub>), 46.0 (CH), 43.5 (CH<sub>2</sub>), 32.3 (CH<sub>2</sub>), 26.0 (CH<sub>2</sub>), 25.3 (CH<sub>2</sub>), 23.7 (CH<sub>2</sub>) ppm. The spectroscopic data are in accordance with literature values.<sup>[S2]</sup>

## 2.6 Methyl 12-oxo-5,6,7,8,9,10,11,12-octahydrobenzocyclodecene-5-carboxylate (**2d**)

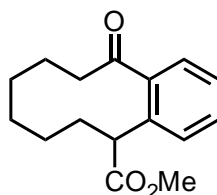

According to GPA, oxoester **5d** (104 mg, 0.269 mmol) and TMSCl (88 mg, 0.81 mmol) were converted to furnish product **2d** (31 mg, 0.12 mmol, 44%) as colorless oil after column chromatography (SiO<sub>2</sub>, *n*-pentane/Et<sub>2</sub>O 10:1, R<sub>f</sub> = 0.08). <sup>1</sup>H NMR (500 MHz, CDCl<sub>3</sub>): δ = 7.45–7.38 (m, 2 H), 7.34–7.27 (m, 2 H), 4.43–4.34 (m, 1 H), 3.70 (s, 3 H), 3.23–3.17 (m, 1 H), 2.55–2.48 (m, 1 H), 1.83–1.73 (m, 3 H), 1.58–1.50 (m, 1 H), 1.44–1.14 (m, 5 H), 0.61–0.50 (m, 1 H) ppm. <sup>13</sup>C{<sup>1</sup>H} NMR (125 MHz, CDCl<sub>3</sub>): δ = 210.5 (C), 175.1 (C), 141.3 (C), 136.7 (C), 131.1 (CH), 128.3 (CH), 126.6 (CH), 125.8 (CH), 52.2 (CH<sub>3</sub>), 44.3 (CH<sub>2</sub>), 42.0 (CH), 32.3 (CH<sub>2</sub>), 28.2 (CH<sub>2</sub>), 22.7 (CH<sub>2</sub>), 22.0 (CH<sub>2</sub>), 20.9 (CH<sub>2</sub>) ppm. IR (ATR): λ<sup>-1</sup> = 2937 (m), 2851 (m), 1727 (s), 1674 (s), 1600 (w), 1571 (w), 1487 (w), 1249 (m), 1441 (m), 1414 (m), 1347 (m), 1324 (m), 1302 (w), 1267 (s), 1210 (s), 1186 (s), 1148 (m), 1107 (m), 1097 (m), 1028 (m), 1015 (m), 994 (m), 944 (m), 861 (m), 797 (m), 759 (s), 743 (s), 636 (m), 583 (m), 547 (m) cm<sup>-1</sup>. MS (EI, 70 eV): *m/z* (%) 260 (11) [M<sup>+</sup>], 201 (13), 200 (46), 161 (20), 157 (24), 144 (16), 131 (19), 115 (17), 103 (13), 86 (19), 84 (31), 77 (13), 55 (13), 51 (28), 49 (100). HRMS (EI, 70 eV): calcd. 260.1407 (for C<sub>16</sub>H<sub>20</sub>O<sub>3</sub><sup>+</sup>), found 260.1408 [M<sup>+</sup>].



## 2.7 Ethyl 12-oxo-5,6,7,12-tetrahydrodibenzo[a,d]cyclooctadiene-5-carboxylate (**2f**)

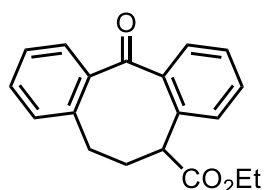

According to GPA, oxoester **5f** (163 mg, 0.388 mmol) and TMSCl (130 mg, 1.20 mmol) were converted to furnish product **2f** (11 mg, 37  $\mu$ mol, 10%) as colorless oil after column chromatography (SiO<sub>2</sub>, *n*-pentane/Et<sub>2</sub>O 10:1, R<sub>f</sub> = 0.16). <sup>1</sup>H NMR (500 MHz, CDCl<sub>3</sub>):  $\delta$  = 8.21 (dd, *J* = 8.0 Hz, *J* = 1.4 Hz, 1 H), 7.93 (dd, *J* = 7.9 Hz, *J* = 1.4 Hz, 1 H), 7.55–7.50 (m, 2 H), 7.44–7.38 (m, 2 H), 7.23–7.18 (m, 2 H), 4.19–4.01 (m, 2 H), 3.85 (dd, *J* = 12.0 Hz, *J* = 4.6 Hz, 1 H), 2.74–2.50 (m, 2 H), 2.15–2.07 (m, 1 H), 2.06–1.97 (m, 1 H), 1.16 (t, *J* = 7.1 Hz, 3 H) ppm. <sup>13</sup>C{<sup>1</sup>H} NMR (125 MHz, CDCl<sub>3</sub>):  $\delta$  = 194.3 (C), 173.2 (C), 141.4 (C), 140.8 (C), 139.1 (C), 136.9 (C), 133.8 (CH), 132.9 (CH), 131.3 (CH), 130.9 (CH), 130.8 (CH), 127.6 (CH), 127.1 (CH), 126.1 (CH), 61.1 (CH<sub>2</sub>), 45.3 (CH), 35.6 (CH<sub>2</sub>), 30.7 (CH<sub>2</sub>), 14.2 (CH<sub>3</sub>) ppm. The spectroscopic data are in accordance with literature values.<sup>[S2]</sup>

## 2.8 Ethyl 2-(2-acetylphenyl)propanoate (**2g**)

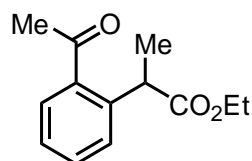

According to GPA, oxoester **5g** (176 mg, 0.508 mmol) and TMSCl (166 mg, 1.52 mmol) were converted to furnish product **2g** (59 mg, 0.27 mmol, 54%) as colorless oil after column chromatography (SiO<sub>2</sub>, *n*-pentane/EtOAc 20:1, R<sub>f</sub> = 0.14). <sup>1</sup>H NMR (500 MHz, CDCl<sub>3</sub>):  $\delta$  = 7.66 (d, *J* = 7.8 Hz, 1 H), 7.45 (t, *J* = 7.6 Hz, 1 H), 7.39 (d, *J* = 7.7 Hz, 1 H), 7.32 (t, *J* = 7.4 Hz, 1 H), 4.41 (q, *J* = 7.2 Hz, 1 H), 4.16–4.05 (m, 2 H), 2.59 (s, 3 H), 1.50 (d, *J* = 7.2 Hz, 3 H), 1.18 (t, *J* = 7.1 Hz, 3 H) ppm. <sup>13</sup>C{<sup>1</sup>H} NMR (125 MHz, CDCl<sub>3</sub>):  $\delta$  = 202.2 (C), 174.6 (C), 140.3 (C), 137.8 (C), 131.8 (CH), 129.1 (CH), 128.7 (CH), 126.8 (CH), 60.7 (CH<sub>2</sub>), 41.7 (CH), 29.8 (CH<sub>3</sub>), 18.3 (CH<sub>3</sub>), 14.2 (CH<sub>3</sub>) ppm. The spectroscopic data are in accordance with literature values.<sup>[S2]</sup>

## 2.9 Ethyl 2-(2-benzoylphenyl)acetate (**2h**)

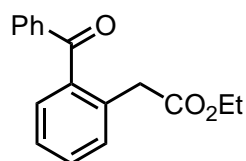

According to GPA, oxoester **5h** (125 mg, 0.317 mmol) and TMSCl (104 mg, 0.957 mmol) were converted to furnish product **2h** (16 mg, 60  $\mu$ mol, 18%) as colorless oil after column

chromatography (SiO<sub>2</sub>, *n*-pentane/Et<sub>2</sub>O 10:1, R<sub>f</sub> = 0.27). <sup>1</sup>H NMR (500 MHz, CDCl<sub>3</sub>): δ = 7.84–7.80 (m, 2 H), 7.58 (t, *J* = 7.4 Hz, *J* = 1.3 Hz, 1 H), 7.50–7.43 (m, 3 H), 7.41–7.36 (m, 2 H), 7.33 (dt, *J* = 7.5 Hz, *J* = 1.2 Hz, 1 H), 4.02 (q, *J* = 7.1 Hz, 2 H), 3.88 (s, 2 H), 1.11 (t, *J* = 7.1 Hz, 3 H) ppm. <sup>13</sup>C{<sup>1</sup>H} NMR (125 MHz, CDCl<sub>3</sub>): δ = 198.1 (C), 171.4 (C), 138.5 (C), 138.0 (C), 134.2 (C), 133.0 (CH), 131.9 (CH), 131.0 (CH), 130.5 (2 CH), 130.1 (CH), 128.4 (2 CH), 126.6 (CH), 61.0 (CH<sub>2</sub>), 39.0 (CH<sub>2</sub>), 14.2 (CH<sub>3</sub>) ppm. The spectroscopic data are in accordance with literature values.<sup>[S4]</sup>

## 2.10 Ethyl 1-methyl-9-oxo-6,7,8,9-tetrahydro-5*H*-benzocycloheptene-5-carboxylate (**2i**)

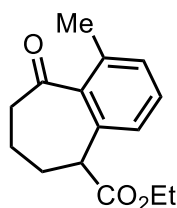

According to GPA, oxoester **5i** (108 mg, 0.290 mmol) and TMSCl (95 mg, 0.87 mmol) were converted to furnish product **2i** (32 mg, 0.13 mmol, 45%) as colorless oil after column chromatography (SiO<sub>2</sub>, *n*-pentane/Et<sub>2</sub>O 5:1, R<sub>f</sub> = 0.27). <sup>1</sup>H NMR (500 MHz, CDCl<sub>3</sub>): δ = 7.28–7.23 (m, 1 H), 7.16 (d, *J* = 7.7 Hz, 1 H), 6.96 (d, *J* = 7.7 Hz, 1 H), 4.17 (q, *J* = 7.2 Hz, 2 H), 3.82 (dd, *J* = 9.1 Hz, *J* = 5.8 Hz, 1 H), 2.64 (ddd, *J* = 17.7 Hz, *J* = 7.0 Hz, *J* = 3.4 Hz, 1 H), 2.52 (ddd, *J* = 17.6 Hz, *J* = 11.0 Hz, *J* = 3.4 Hz, 1 H), 2.31 (s, 3 H), 2.27–2.19 (m, 1 H), 2.02–1.94 (m, 1 H), 1.87–1.77 (m, 1 H), 1.74–1.65 (m, 1 H), 1.22 (t, *J* = 7.2 Hz, 3 H) ppm. <sup>13</sup>C{<sup>1</sup>H} NMR (125 MHz, CDCl<sub>3</sub>): δ = 209.4 (C), 173.2 (C), 139.2 (C), 135.8 (C), 134.9 (C), 130.3 (CH), 130.3 (CH), 124.8 (CH), 61.2 (CH<sub>2</sub>), 48.2 (CH), 42.0 (CH<sub>2</sub>), 28.4 (CH<sub>2</sub>), 20.8 (CH<sub>2</sub>), 20.0 (CH<sub>3</sub>), 14.2 (CH<sub>3</sub>) ppm. IR (ATR): λ<sup>-1</sup> = 2934 (w), 2869 (w), 1729 (s), 1687 (s), 1594 (m), 1464 (m), 1372 (w), 1320 (w), 1242 (m), 1186 (m), 1096 (w), 1066 (w), 1028 (m), 983 (w), 910 (m), 874 (w), 840 (w), 786 (m), 740 (m), 576 (w) cm<sup>-1</sup>. MS (EI, 70 eV): *m/z* (%) 246 (90) [M<sup>+</sup>], 218 (22), 201 (24), 200 (85), 189 (77), 173 (78), 161 (24), 157 (20), 146 (41), 145 (100), 144 (33), 129 (22), 115 (45), 84 (23), 49 (38). HRMS (EI, 70 eV): calcd. 246.1250 (for C<sub>15</sub>H<sub>18</sub>O<sub>3</sub><sup>+</sup>), found 246.1259 [M<sup>+</sup>].

## 2.11 Ethyl 1-fluoro-9-oxo-6,7,8,9-tetrahydro-5*H*-benzocycloheptene-5-carboxylate (**2j**)

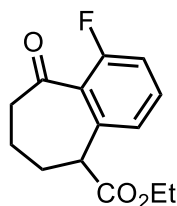

According to GPA, oxoester **5j** (83 mg, 0.22 mmol) and TMSCl (72 mg, 0.66 mmol) were converted to furnish product **2j** (29 mg, 0.12 mmol, 55%) as colorless oil after column chromatography (SiO<sub>2</sub>, *n*-pentane/Et<sub>2</sub>O 5:1, R<sub>f</sub> = 0.24). <sup>1</sup>H NMR (500 MHz, CDCl<sub>3</sub>): δ = 7.42–7.30

(m, 1 H), 7.06 (t,  $J = 9.0$  Hz, 1 H), 6.95 (d,  $J = 7.7$  Hz, 1 H), 4.24–4.10 (m, 2 H), 3.89 (dd,  $J = 7.8$  Hz,  $J = 5.7$  Hz, 1 H), 2.73 (ddd,  $J = 17.1$  Hz,  $J = 7.4$  Hz,  $J = 3.8$  Hz, 1 H), 2.59 (ddd,  $J = 17.0$  Hz,  $J = 9.8$  Hz,  $J = 4.0$  Hz, 1 H), 2.39–2.24 (m, 1 H), 2.10–1.95 (m, 1 H), 1.93–1.73 (m, 2 H), 1.21 (t,  $J = 7.1$  Hz, 3 H) ppm.  $^{13}\text{C}\{^1\text{H}\}$  NMR (125 MHz,  $\text{CDCl}_3$ ):  $\delta = 203.0$  (C), 172.6 (C), 159.3 (d,  $J_{\text{CF}} = 254.5$  Hz, CF), 137.5 (d,  $J_{\text{CF}} = 1.6$  Hz, C), 132.2 (d,  $J_{\text{CF}} = 9.2$  Hz, CH), 128.1 (d,  $J_{\text{CF}} = 13.5$  Hz, C), 123.8 (d,  $J_{\text{CF}} = 3.2$  Hz, CH), 115.8 (d,  $J_{\text{CF}} = 23.3$  Hz, CH), 61.5 ( $\text{CH}_2$ ), 48.8 (CH), 42.1 ( $\text{CH}_2$ ), 28.5 ( $\text{CH}_2$ ), 20.9 ( $\text{CH}_2$ ), 14.2 ( $\text{CH}_3$ ) ppm.  $^{19}\text{F}\{^1\text{H}\}$  NMR (470 MHz,  $\text{CDCl}_3$ ):  $\delta = -116.64$  ppm. IR (ATR):  $\lambda^{-1} = 2936$  (m), 2872 (w), 1729 (s), 1696 (s), 1610 (m), 1576 (m), 1457 (m), 1372 (m), 1320 (w), 1244 (s), 1179 (s), 1096 (w), 1066 (w), 1026 (m), 1000 (m), 923 (m), 913 (m), 874 (w), 795 (m), 734 (m), 684 (w), 597 (w), 516 (w)  $\text{cm}^{-1}$ . MS (EI, 70 eV):  $m/z$  (%) 250 (68) [ $\text{M}^+$ ], 204 (53), 193 (25), 177 (54), 176 (50), 165 (20), 149 (100), 147 (18), 109 (25), 101 (30), 86 (21), 84 (36), 51 (17), 49 (53). HRMS (EI, 70 eV): calcd. 250.1000 (for  $\text{C}_{14}\text{H}_{15}\text{FO}_3^+$ ), found 250.0998 [ $\text{M}^+$ ].

## 2.12 Ethyl 3-bromo-9-oxo-6,7,8,9-tetrahydro-5H-benzocycloheptene-5-carboxylate (2k)

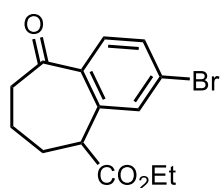

According to GPA, oxoester **5k** (161 mg, 0.368 mmol) and TMSCl (120 mg, 1.10 mmol) were converted to furnish product **2k** (64 mg, 0.21 mmol, 57%) as colorless oil after column chromatography [ $\text{SiO}_2$ ,  $n$ -pentane/ $\text{Et}_2\text{O}$  10:1→5:1,  $R_f(10:1) = 0.17$ ].  $^1\text{H}$  NMR (500 MHz,  $\text{CDCl}_3$ ):  $\delta = 7.53$ – $7.47$  (m, 2 H), 7.37– $7.34$  (m, 1 H), 4.22– $4.14$  (m, 2 H), 3.94 (t,  $J = 6.3$  Hz, 1 H), 2.77– $2.69$  (m, 1 H), 2.64– $2.56$  (m, 1 H), 2.42– $2.35$  (m, 1 H), 2.10– $2.01$  (m, 1 H), 1.87– $1.80$  (m, 2 H), 1.22 (t,  $J = 7.2$  Hz, 3 H) ppm.  $^{13}\text{C}\{^1\text{H}\}$  NMR (125 MHz,  $\text{CDCl}_3$ ):  $\delta = 204.7$  (C), 172.7 (C), 138.6 (C), 138.4 (C), 132.0 (CH), 131.0 (CH), 130.5 (CH), 126.5 (C), 61.6 ( $\text{CH}_2$ ), 48.9 (CH), 40.8 ( $\text{CH}_2$ ), 28.3 ( $\text{CH}_2$ ), 20.2 ( $\text{CH}_2$ ), 14.2 ( $\text{CH}_3$ ) ppm. IR (ATR):  $\lambda^{-1} = 2937$  (m), 2870 (w), 1727 (s), 1683 (s), 1584 (s), 1558 (w), 1446 (m), 1397 (w), 1369 (w), 1321 (w), 1253 (m), 1183 (s), 1092 (m), 1023 (m), 983 (m), 916 (w), 821 (m), 770 (w), 731 (w), 657 (w), 574 (w), 527 (w)  $\text{cm}^{-1}$ . MS (EI, 70 eV):  $m/z$  (%) 310 (55) [ $\text{M}^+$ ], 264 (50), 255 (25), 239 (32), 238 (38), 236 (35), 225 (18), 209 (40), 158 (20), 130 (100), 129 (50), 115 (35), 102 (90), 55 (22). HRMS (EI, 70 eV): calcd. 310.0199 (for  $\text{C}_{14}\text{H}_{15}\text{BrO}_3^+$ ), found 310.0196 [ $\text{M}^+$ ].

### 2.13 Ethyl 9-oxo-3-(trifluoromethyl)-6,7,8,9-tetrahydro-5H-benzocycloheptene-5-carboxylate (**2l**)

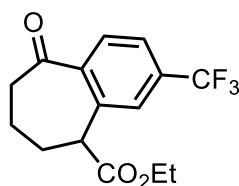

According to GPA, oxoester **5l** (111 mg, 0.260 mmol) and TMSCl (85 mg, 0.78 mmol) were converted to furnish product **2l** (43 mg, 0.14 mmol, 55%) as colorless oil after column chromatography [ $\text{SiO}_2$ , *n*-pentane/ $\text{Et}_2\text{O}$  10:1→5:1,  $R_f(10:1) = 0.15$ ].  $^1\text{H}$  NMR (300 MHz,  $\text{CDCl}_3$ ):  $\delta = 7.74$  (d,  $J = 8.0$  Hz, 1 H), 7.63 (d,  $J = 7.9$  Hz, 1 H), 7.49–7.40 (m, 1 H), 4.25–4.14 (m, 2 H), 4.04 (t,  $J = 6.2$  Hz, 1 H), 2.84–2.71 (m, 1 H), 2.70–2.58 (m, 1 H), 2.47–2.37 (m, 1 H), 2.18–2.00 (m, 1 H), 1.95–1.80 (m, 2 H), 1.23 (t,  $J = 7.2$  Hz, 3 H) ppm.  $^{13}\text{C}\{^1\text{H}\}$  NMR (125 MHz,  $\text{CDCl}_3$ ):  $\delta = 204.9$  (C), 172.6 (C), 142.7 (C), 137.3 (C), 133.4 (q,  $J_{\text{CF}} = 32.6$  Hz, C), 129.4 (CH), 126.1 (q,  $J_{\text{CF}} = 3.6$  Hz, CH), 124.8 (q,  $J_{\text{CF}} = 3.4$  Hz, CH), 123.7 (q,  $J_{\text{CF}} = 273.9$  Hz,  $\text{CF}_3$ ), 61.7 ( $\text{CH}_2$ ), 49.2 (CH), 41.0 ( $\text{CH}_2$ ), 28.4 ( $\text{CH}_2$ ), 20.4 ( $\text{CH}_2$ ), 14.1 ( $\text{CH}_3$ ) ppm.  $^{19}\text{F}\{^1\text{H}\}$  NMR (470 MHz,  $\text{CDCl}_3$ ):  $\delta = -63.02$  ppm. IR (ATR):  $\lambda^{-1} = 2937$  (m), 2874 (w), 1729 (s), 1689 (s), 1577 (w), 1494 (w), 1449 (m), 1417 (m), 1372 (w), 1329 (s), 1303 (m), 1253 (m), 1166 (s), 1124 (s), 1084 (s), 1069 (m), 987 (m), 919 (w), 899 (w), 886 (w), 836 (m), 736 (w), 703 (w), 650 (w), 574 (w), 529 (w)  $\text{cm}^{-1}$ . MS (EI, 70 eV):  $m/z$  (%) 300 (77) [ $\text{M}^+$ ], 281 (28), 272 (17), 254 (80), 243 (50), 227 (46), 226 (66), 215 (23), 199 (100), 171 (21), 159 (22), 151 (42), 84 (17), 51(16), 49 (48). HRMS (EI, 70 eV): calcd. 300.0968 (for  $\text{C}_{15}\text{H}_{15}\text{O}_3\text{F}_3^+$ ), found 300.0963 [ $\text{M}^+$ ].

### 2.14 9-Ethyl 2-methyl-5-oxo-6,7,8,9-tetrahydro-5H-benzocycloheptene-2,9-dicarboxylate (**2m**)

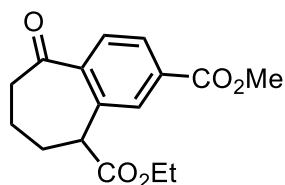

According to GPA, oxoester **5m** (93 mg, 0.22 mmol) and TMSCl (73 mg, 0.67 mmol) were converted to furnish product **2m** (38 mg, 0.13 mmol, 59%) as colorless oil after column chromatography [ $\text{SiO}_2$ , *n*-pentane/ $\text{Et}_2\text{O}$  5:1→3:1,  $R_f(5:1) = 0.21$ ].  $^1\text{H}$  NMR (500 MHz,  $\text{CDCl}_3$ ):  $\delta = 8.00$  (dd,  $J = 8.0$  Hz,  $J = 1.6$  Hz, 1 H), 7.87 (d,  $J = 1.4$  Hz, 1 H), 7.67 (d,  $J = 8.0$  Hz, 1 H), 4.22–4.13 (m, 2 H), 4.04 (t,  $J = 6.1$  Hz, 1 H), 3.92 (s, 3 H), 2.80–2.72 (m, 1 H), 2.67–2.59 (m, 1 H), 2.46–2.38 (m, 1 H), 2.12–2.04 (m, 1 H), 1.88–1.81 (m, 2 H), 1.21 (t,  $J = 7.1$  Hz, 3 H) ppm.  $^{13}\text{C}\{^1\text{H}\}$  NMR (125 MHz,  $\text{CDCl}_3$ ):  $\delta = 205.4$  (C), 172.9 (C), 166.3 (C), 143.4 (C), 136.8 (C), 133.0 (C), 130.5 (CH), 128.9 (2 CH), 61.6 ( $\text{CH}_2$ ), 52.5 ( $\text{CH}_3$ ), 49.3 (CH), 41.0 ( $\text{CH}_2$ ), 28.4 ( $\text{CH}_2$ ), 20.5 ( $\text{CH}_2$ ), 14.2 ( $\text{CH}_3$ ) ppm. IR (ATR):  $\lambda^{-1} = 2953$  (m), 2872 (w), 1722 (s), 1684 (s),



### 3.3 Ethyl 1-(2-iodophenyl)-2-oxocyclohexane-1-carboxylate (**5b**)

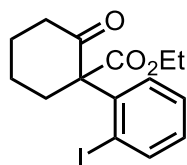

According to GPB, PIFA (**9a**) (1.74 g, 4.04 mmol), ethyl 2-oxocyclohexane-1-carboxylate (**1b**) (0.50 mL, 0.53 g, 3.1 mmol) and TFAA (0.65 mL, 0.98 g, 4.7 mmol) were converted to furnish compound **5b** (463 mg, 1.24 mmol, 40%) after column chromatography (SiO<sub>2</sub>, hexanes/MTBE 3:1, R<sub>f</sub> = 0.30) as a colorless oil. <sup>1</sup>H NMR (300 MHz, CDCl<sub>3</sub>): δ = 7.96 (dd, *J* = 7.7 Hz, *J* = 1.2 Hz, 1 H), 7.32 (td, *J* = 7.7 Hz, *J* = 1.2 Hz, 1 H), 7.06 (dd, *J* = 7.7 Hz, *J* = 1.5 Hz, 1 H), 6.96 (td, *J* = 7.7 Hz, *J* = 1.5 Hz, 1 H), 4.34–4.22 (m, 2 H), 2.85–2.57 (m, 4 H), 2.11–1.97 (m, 2 H), 1.89–1.76 (m, 2 H), 1.27 (t, *J* = 7.1 Hz, 3 H) ppm. The spectroscopic data are in accordance with literature values.<sup>[S5]</sup>

### 3.4 Methyl 1-(2-iodophenyl)-2-oxocycloheptane-1-carboxylate (**5c**)

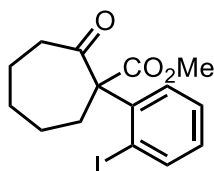

According to GPB, PIFA (**9a**) (1.81 g, 4.20 mmol), methyl 2-oxocycloheptane-1-carboxylate (**1c**) (0.50 mL, 0.55 g, 3.2 mmol) and TFAA (0.68 mL, 1.0 g, 4.9 mmol) were converted to furnish compound **5c** (554 mg, 1.49 mmol, 46%) after column chromatography (SiO<sub>2</sub>, hexanes/MTBE 3:1, R<sub>f</sub> = 0.41) as a colorless oil. <sup>1</sup>H NMR (300 MHz, CDCl<sub>3</sub>): δ = 7.94 (dd, *J* = 7.7 Hz, *J* = 1.4 Hz, 1 H), 7.31 (td, *J* = 7.7 Hz, *J* = 1.2 Hz, 1 H), 7.02 (dd, *J* = 7.7 Hz, *J* = 1.2 Hz, 1 H), 6.95 (td, *J* = 7.7 Hz, *J* = 1.4 Hz, 1 H), 3.73 (s, 3 H), 3.22–3.15 (m, 1 H), 3.03–2.96 (m, 1 H), 2.80–2.72 (m, 1 H), 2.19–2.11 (m, 1 H), 1.80–1.68 (m, 5 H), 1.56–1.47 (m, 1 H) ppm. The spectroscopic data are in accordance with literature values.<sup>[S5]</sup>

### 3.5 Methyl 2-oxocyclooctane-1-carboxylate (**1d**)

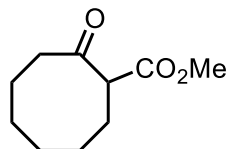

A solution of cyclooctanone (2.00 g, 15.8 mmol) in THF (15 mL) was dropwise added to a stirred suspension of NaH (1.33 g, 60% dispersion in mineral oil, 33.2 mmol) and dimethyl carbonate (447 mg, 3.18 mmol) in THF (30 mL). After heating the mixture to reflux for 4 h, hydrochloric acid (1 mol L<sup>-1</sup>, 25 mL) was added. The mixture was extracted with MTBE (3 × 50 mL). The combined organic layers were dried over MgSO<sub>4</sub> and filtered. The solvent was removed *in vacuo* and the crude product was purified by column chromatography (SiO<sub>2</sub>, hex-

anes/MTBE 10:1,  $R_f = 0.37$ ) to give compound **1d** (2.35 g, 12.8 mmol, 81%) as a colorless liquid. According to  $^1\text{H}$  NMR, the compound is predominantly the enol tautomer (enol/keto 88:12).  $^1\text{H}$  NMR (300 MHz,  $\text{CDCl}_3$ ), enol tautomer:  $\delta = 12.51$  (s, 1 H), 3.75 (s, 3 H), 2.42–2.32 (m, 4 H), 1.76–1.68 (m, 2 H), 1.57–1.42 (m, 6 H) ppm; the signals of the keto tautomer could not be assigned with certainty due to overlapping with the enol tautomer. The spectroscopic data are in accordance with literature values.<sup>[S6]</sup>

### 3.6 Methyl 1-(2-iodophenyl)-2-oxocyclooctane-1-carboxylate (**5d**)

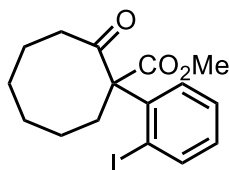

According to GPB, PIFA (**9a**) (3.04 g, 7.06 mmol), methyl 2-oxocyclooctane-1-carboxylate (**1d**) (1.00 g, 5.43 mmol) and TFAA (1.1 mL, 1.7 g, 8.2 mmol) were converted to furnish compound **5d** (1.56 g, 4.04 mmol, 74%) after column chromatography ( $\text{SiO}_2$ , hexanes/MTBE 5:1,  $R_f = 0.32$ ) as a colorless oil.  $^1\text{H}$  NMR (300 MHz,  $\text{CDCl}_3$ ):  $\delta = 7.94$  (dd,  $J = 7.8$  Hz,  $J = 1.2$  Hz, 1 H), 7.44 (dd,  $J = 8.0$  Hz,  $J = 1.7$  Hz, 1 H), 7.36 (td,  $J = 8.1$  Hz,  $J = 1.4$  Hz, 1 H), 6.96 (td,  $J = 7.7$  Hz,  $J = 1.8$  Hz, 1 H), 3.70 (s, 3 H), 3.13 (ddd,  $J = 13.1$  Hz,  $J = 9.4$  Hz,  $J = 4.0$  Hz, 1 H), 2.78 (ddd,  $J = 15.1$  Hz,  $J = 8.9$  Hz,  $J = 3.6$  Hz, 1 H), 2.66 (ddd,  $J = 15.1$  Hz,  $J = 8.1$  Hz,  $J = 3.0$  Hz, 1 H), 2.49 (ddd,  $J = 12.4$  Hz,  $J = 8.1$  Hz,  $J = 4.0$  Hz, 1 H), 1.94–1.78 (m, 3 H), 1.65–1.49 (m, 3 H), 1.42–1.32 (m, 2 H) ppm.  $^{13}\text{C}\{^1\text{H}\}$  NMR (75 MHz,  $\text{CDCl}_3$ ):  $\delta = 209.5$  (C), 171.1 (C), 142.3 (CH), 140.4 (C), 130.1 (CH), 129.0 (CH), 127.9 (CH), 100.0 (C), 71.4 (C), 53.3 (CH<sub>3</sub>), 39.8 (CH<sub>2</sub>), 33.2 (CH<sub>2</sub>), 28.9 (CH<sub>2</sub>), 26.5 (CH<sub>2</sub>), 25.9 (CH<sub>2</sub>), 24.6 (CH<sub>2</sub>) ppm. IR (ATR):  $\lambda^{-1} = 2927$  (m), 2856 (w), 1729 (vs), 1706 (vs), 1216 (vs)  $\text{cm}^{-1}$ . MS (EI, 70 eV):  $m/z$  (%) 386 (53) [ $\text{M}^+$ ], 354 (6), 326 (15), 289 (23), 259 (100), 229 (71), 227 (70), 217 (59), 199 (63), 189 (30), 171 (30), 161 (87), 129 (76), 115 (81), 103 (71), 91 (60), 55 (57). HRMS (EI, 70 eV): calcd. 386.0373 (for  $\text{C}_{16}\text{H}_{19}\text{IO}_3^+$ ), found 386.0374 [ $\text{M}^+$ ].

### 3.7 Methyl 2-(2-iodophenyl)-1-oxoindane-2-carboxylate (**5e**)

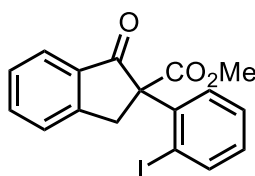

According to GPB, PIFA (**9a**) (851 mg, 1.98 mmol), methyl 1-oxoindane-2-carboxylate (**1e**) (290 mg, 1.52 mmol) and TFAA (0.32 mL, 0.48 g, 2.3 mmol) were converted to furnish compound **5e** (301 mg, 0.77 mmol, 51%) after column chromatography ( $\text{SiO}_2$ , hexanes/MTBE 3:1,  $R_f = 0.41$ ) as a colorless oil.  $^1\text{H}$  NMR (300 MHz,  $\text{CDCl}_3$ ):  $\delta = 8.03$  (dd,  $J = 7.9$  Hz,  $J = 1.2$  Hz, 1 H), 7.97 (d,  $J = 7.7$  Hz, 1 H), 7.74 (dt,  $J = 7.6$  Hz,  $J = 1.0$  Hz, 1 H), 7.57–7.49 (m, 2 H),

7.34 (td,  $J = 7.6$  Hz,  $J = 1.3$  Hz, 1 H), 7.25 (dd,  $J = 7.9$  Hz,  $J = 1.7$  Hz, 1 H), 7.04 (td,  $J = 7.6$  Hz,  $J = 1.7$  Hz, 1 H), 4.75 (d,  $J = 17.5$  Hz, 1 H), 3.86 (s, 3 H), 3.42 (d,  $J = 17.5$  Hz, 1 H) ppm. The spectroscopic data are in accordance with literature values.<sup>[S5]</sup>

### 3.8 Ethyl 2-(2-iodophenyl)-1-oxo-1,2,3,4-tetrahydronaphthalene-2-carboxylate (5f)

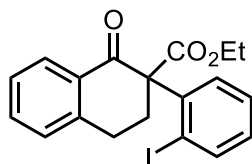

According to GPB, PIFA (**9a**) (1.28 g, 2.98 mmol), ethyl 1-oxo-1,2,3,4-tetrahydronaphthalene-2-carboxylate (**1f**) (500 mg, 2.29 mmol) and TFAA (0.48 mL, 0.72 g, 3.4 mmol) were converted to furnish compound **5f** (179 mg, 0.426 mmol, 19%) after column chromatography (SiO<sub>2</sub>, hexanes/MTBE 3:1,  $R_f = 0.36$ ) as a colorless oil. <sup>1</sup>H NMR (300 MHz, CDCl<sub>3</sub>):  $\delta = 8.17$  (dd,  $J = 7.8$  Hz,  $J = 0.8$  Hz, 1 H), 7.96 (dd,  $J = 7.8$  Hz,  $J = 1.1$  Hz, 1 H), 7.50 (td,  $J = 7.6$  Hz,  $J = 1.2$  Hz, 1 H), 7.37 (t,  $J = 7.5$  Hz, 1 H), 7.17 (d,  $J = 8.0$  Hz, 1 H), 7.12 (td,  $J = 7.7$  Hz,  $J = 1.2$  Hz, 1 H), 6.92 (td,  $J = 7.7$  Hz,  $J = 1.4$  Hz, 1 H), 6.84 (dd,  $J = 7.9$  Hz,  $J = 1.4$  Hz, 1 H), 4.36 (dq,  $J = 10.7$  Hz,  $J = 7.1$  Hz, 1 H), 4.27 (dq,  $J = 10.7$  Hz,  $J = 7.1$  Hz, 1 H), 3.49–3.41 (m, 1 H), 2.90–2.77 (m, 2 H), 2.52–2.41 (m, 1 H), 1.29 (t,  $J = 7.1$  Hz, 3 H) ppm. <sup>13</sup>C{<sup>1</sup>H} NMR (75 MHz, CDCl<sub>3</sub>):  $\delta = 194.9$  (C), 170.7 (C), 143.6 (C), 142.6 (CH), 139.4 (C), 134.0 (CH), 132.7 (C), 130.1 (CH), 129.1 (CH), 128.9 (CH), 128.3 (CH), 128.0 (CH), 127.2 (CH), 97.6 (C), 67.0 (C), 62.3 (CH<sub>2</sub>), 31.2 (CH<sub>2</sub>), 25.8 (CH<sub>2</sub>), 14.1 (CH<sub>3</sub>) ppm. IR (ATR):  $\lambda^{-1} = 2993$  (w), 1729 (s), 1681 (s), 1232 (s), 1009 (s), 739 (vs) cm<sup>-1</sup>. HRMS (ESI): calcd. 443.0115 (for C<sub>19</sub>H<sub>17</sub>INaO<sub>3</sub><sup>+</sup>), found 443.0110 [M + Na<sup>+</sup>].

### 3.9 Ethyl 2-(2-iodophenyl)-2-methyl-3-oxobutanoate (5g)

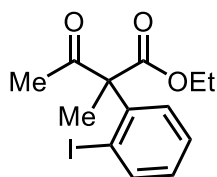

According to GPB, PIFA (**9a**) (1.94 g, 4.51 mmol), ethyl 2-methyl-3-oxobutanoate **1g** (500 mg, 3.47 mmol) and TFAA (0.72 mL, 1.1 g, 5.2 mmol) were converted to furnish compound **5g** (533 mg, 1.54 mmol, 44%) after column chromatography (SiO<sub>2</sub>, hexanes/MTBE 5:1,  $R_f = 0.25$ ) as a colorless oil. <sup>1</sup>H NMR (300 MHz, CDCl<sub>3</sub>):  $\delta = 7.94$  (t,  $J = 7.7$  Hz, 1 H), 7.36 (t,  $J = 7.7$  Hz, 1 H), 7.11 (d,  $J = 7.7$  Hz, 1 H), 6.98 (t,  $J = 7.7$  Hz, 1 H), 4.32–4.21 (m, 2 H), 2.44 (s, 3 H), 1.86 (s, 3 H), 1.28 (t,  $J = 7.2$  Hz, 3 H) ppm. <sup>13</sup>C{<sup>1</sup>H} NMR (75 MHz, CDCl<sub>3</sub>):  $\delta = 205.2$  (C), 171.3 (C), 142.9 (C), 142.2 (CH), 129.08 (CH), 129.02 (CH), 128.5 (CH), 98.7 (C), 68.6 (C), 62.4 (CH<sub>2</sub>), 29.4 (CH<sub>3</sub>), 22.2 (CH<sub>3</sub>), 14.0 (CH<sub>3</sub>) ppm. IR (ATR):  $\lambda^{-1} = 2984$  (w), 1712 (vs), 1232 (s), 1167 (s), 1103 (s), 1010 (s), 754 (s) cm<sup>-1</sup>. MS (EI, 70 eV):  $m/z$  (%) 346 (<1) [M<sup>+</sup>],



304 (50), 258 (5), 219 (7), 177 (31), 149 (24), 148 (20), 146 (16), 131 (23), 121 (12), 103 (52), 91 (10), 77 (24), 41 (9). HRMS (EI, 70 eV): calcd. 346.0060 (for C<sub>13</sub>H<sub>15</sub>I O<sub>3</sub><sup>+</sup>), found 346.0069 [M<sup>+</sup>].

### 3.10 Ethyl 2-iodophenylacetate

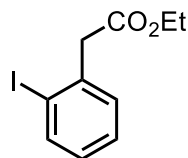

Conc. sulfuric acid (0.13 g, 1.4 mmol) was added to a stirred solution of 2-iodoacetic acid (2.00 g, 7.63 mmol) in EtOH (30 mL). After heating the mixture to reflux for 4 h, water (60 mL) was added. The mixture was extracted with MTBE (3 × 50 mL). The combined organic layers were washed with NaHCO<sub>3</sub> (saturated aqueous solution, 30 mL), dried over MgSO<sub>4</sub> and filtered. The solvent was removed *in vacuo* to give ethyl 2-iodophenylacetate (1.74 g, 6.00 mmol, 79%) as a yellow liquid. <sup>1</sup>H NMR (300 MHz, CDCl<sub>3</sub>): δ = 7.85 (d, *J* = 8.0 Hz, 1 H), 7.35–7.27 (m, 2 H), 6.99–6.93 (m, 1 H), 4.19 (q, *J* = 7.1 Hz, 2 H), 3.79 (s, 2 H), 1.28 (t, *J* = 7.1 Hz, 3 H) ppm. The spectroscopic data are in accordance with literature values.<sup>[S7]</sup>

### 3.11 Ethyl 2-(2-iodophenyl)-3-phenyl-3-oxopropionate (5h)

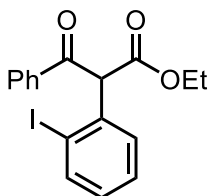

Under nitrogen atmosphere, 1-methylimidazole (0.30 mL, 0.31 g, 3.8 mmol) was added dropwise to a stirred solution of ethyl 2-iodophenylacetate (923 mg, 3.18 mmol) and benzoyl chloride (447 mg, 3.18 mmol) in anhydrous CH<sub>2</sub>Cl<sub>2</sub> (10 mL) at –45 °C. At this temperature, TiCl<sub>4</sub> (1.2 mL, 2.1 g, 11 mmol) and NEt<sub>3</sub> (1.8 mL, 1.3 g, 13 mmol) were dropwise added. After stirring the mixture at this temperature for 1 h, water (20 mL) was added. The mixture was extracted with MTBE (3 × 20 mL). The combined organic layers were dried over MgSO<sub>4</sub> and filtered. The solvent was removed *in vacuo* and the crude product was purified by column chromatography (SiO<sub>2</sub>, hexanes/MTBE 3:1, R<sub>f</sub> = 0.54) to give compound **5h** (1.16 g, 2.94 mmol, 92%) as a yellow liquid. The NMR spectra showed a doubled signal set due to keto/enol tautomers (ratio 20:80). <sup>1</sup>H NMR (300 MHz, CDCl<sub>3</sub>), enol tautomer: δ = 13.50 (s, 1 H), 7.74 (dd, *J* = 7.9 Hz, *J* = 1.0 Hz, 1 H), 7.18–7.11 (m, 3 H), 7.08–7.03 (m, 3 H), 6.93 (dd, *J* = 7.6 Hz, *J* = 1.7 Hz, 1 H), 6.80 (td, *J* = 7.6 Hz, *J* = 1.8 Hz, 1 H), 4.30–4.01 (m, 2 H), 1.19–1.14 (m, 3 H) ppm; keto tautomer: δ = 7.85–7.82 (m, 2 H), 7.81–7.78 (m, 1 H), 7.36–7.29 (m, 2 H), 7.25–7.21 (m, 1 H), 7.18–7.11 (m, 2 H), 6.90–6.84 (m, 1 H), 5.94 (s, 1 H), 4.30–4.01 (m, 2 H), 1.19–1.14 (m, 3 H) ppm. <sup>13</sup>C{<sup>1</sup>H} NMR (75 MHz, CDCl<sub>3</sub>), enol tautomer: δ = 172.4

(C), 171.0 (C), 140.3 (C), 138.9 (CH), 134.5 (C), 132.8 (CH), 129.9 (CH), 128.8 (CH), 128.6 (2 CH), 128.2 (CH), 127.8 (2 CH), 108.1 (C), 105.3 (C), 61.3 (CH<sub>2</sub>), 14.3 (CH<sub>3</sub>) ppm; keto tautomer:  $\delta$  = 193.7 (C), 168.3 (C), 139.9 (CH), 136.7 (C), 135.5 (C), 133.8 (CH), 130.5 (CH), 130.2 (CH), 129.9 (CH), 129.0 (2 CH), 128.9 (2 CH), 101.8 (C), 65.2 (CH), 62.0 (CH<sub>2</sub>), 14.2 (CH<sub>3</sub>) ppm. IR (ATR):  $\lambda^{-1}$  = 3059 (w), 2987 (w), 2934 (w), 1714 (vs), 1334 (s), 1250 (vs), 1134 (s), 744 (s), 696 (s) cm<sup>-1</sup>. MS (EI, 70 eV): *m/z* (%) 394 (48) [M<sup>+</sup>], 267 (31), 244 (30), 221 (86), 194 (12), 177 (10), 165 (56), 105 (100), 89 (23), 77 (83), 51 (19). HRMS (EI, 70 eV): calcd. 394.0060 (for C<sub>17</sub>H<sub>15</sub>IO<sub>3</sub><sup>+</sup>), found 394.0053 [M<sup>+</sup>].

### 3.12 Ethyl 1-(2-iodo-3-methylphenyl)-2-oxocyclopentane-1-carboxylate (**5i**)

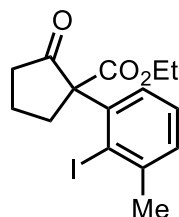

According to GPB, 2-methylphenyliodine bis(trifluoroacetate) (**9i**) (2.65 g, 5.97 mmol), ethyl 2-oxocyclopentane-1-carboxylate (**1a**) (0.68 mL, 0.72 g, 4.6 mmol) and TFAA (0.96 mL, 1.5 g, 6.9 mmol) were converted to furnish compound **5i** (866 mg, 2.33 mmol, 51%) after column chromatography (SiO<sub>2</sub>, hexanes/MTBE 5:1, R<sub>f</sub> = 0.26) as a light yellow oil. <sup>1</sup>H NMR (500 MHz, DMSO-*d*<sub>6</sub>):  $\delta$  = 7.28 (dd, *J* = 7.5 Hz, *J* = 1.5 Hz, 1 H), 7.24 (t, *J* = 7.5 Hz, 1 H), 6.73 (dd, *J* = 7.5 Hz, *J* = 1.5 Hz, 1 H), 4.15 (dq, *J* = 10.9 Hz, *J* = 7.1 Hz, 1 H), 4.07 (dq, *J* = 10.9 Hz, *J* = 7.1 Hz, 1 H), 3.04 (ddd, *J* = 13.3 Hz, *J* = 10.6 Hz, *J* = 6.9 Hz, 1 H), 2.69 (dddd, *J* = 19.1 Hz, *J* = 8.5 Hz, *J* = 3.8 Hz, *J* = 1.8 Hz, 1 H), 2.52–2.47 (m, 2 H), 2.45 (s, 3 H), 2.03–1.96 (m, 1 H), 1.58–1.50 (m, 1 H), 1.15 (t, *J* = 7.1 Hz, 3 H) ppm. <sup>13</sup>C{<sup>1</sup>H} NMR (125 MHz, DMSO-*d*<sub>6</sub>):  $\delta$  = 213.7 (C), 169.2 (C), 143.4 (C), 141.9 (C), 128.6 (CH), 127.7 (CH), 126.3 (CH), 106.7 (C), 70.5 (C), 61.4 (CH<sub>2</sub>), 38.8 (CH<sub>2</sub>), 35.9 (CH<sub>2</sub>), 30.2 (CH<sub>3</sub>), 18.8 (CH<sub>2</sub>), 13.8 (CH<sub>3</sub>) ppm. IR (ATR):  $\lambda^{-1}$  = 2977 (w), 1749 (m), 1717 (vs), 1220 (s), 1004 (s) cm<sup>-1</sup>. MS (EI, 70 eV): *m/z* (%) 372 (66) [M<sup>+</sup>], 315 (25), 299 (44), 284 (40), 271 (66), 245 (100), 243 (83), 217 (85), 199 (58), 189 (80), 172 (81), 162 (80), 143 (78), 130 (82), 128 (80), 105 (24), 91 (33), 77 (25), 55 (59). HRMS (EI, 70 eV): calcd. 372.0217 (for C<sub>15</sub>H<sub>17</sub>IO<sub>3</sub><sup>+</sup>), found 372.0206 [M<sup>+</sup>].

### 3.13 Ethyl 1-(3-fluoro-2-iodophenyl)-2-oxocyclopentane-1-carboxylate (**5j**)

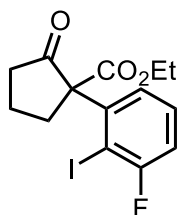

According to GPB, 2-fluorophenyl iodine bis(trifluoroacetate) (**9j**) (2.39 g, 5.33 mmol), ethyl 2-oxocyclopentane-1-carboxylate (**1a**) (0.61 mL, 0.64 g, 4.1 mmol) and TFAA (0.85 mL, 1.3 g, 6.2 mmol) were converted to furnish compound **5j** (421 mg, 1.12 mmol, 27%) after column chromatography (SiO<sub>2</sub>, hexanes/MTBE 5:1, R<sub>f</sub> = 0.21) as a colorless oil. <sup>1</sup>H NMR (500 MHz, CDCl<sub>3</sub>): δ = 7.26–7.22 (m, 1 H), 7.00–6.97 (m, 1 H), 6.76–6.74 (m, 1 H), 4.24 (dq, J = 10.7 Hz, J = 7.1 Hz, 1 H), 4.18 (dq, J = 10.7 Hz, J = 7.1 Hz, 1 H), 3.22 (ddd, J = 13.7 Hz, J = 9.6 Hz, J = 7.0 Hz, 1 H), 2.57–2.47 (m, 3 H), 2.14–2.07 (m, 1 H), 1.76–1.68 (m, 1 H), 1.22 (t, J = 7.1 Hz, 3 H) ppm. <sup>13</sup>C{<sup>1</sup>H} NMR (125 MHz, CDCl<sub>3</sub>): δ = 213.4 (C), 169.5 (C), 162.4 (d, J = 244.4 Hz, C), 144.2 (C), 129.9 (d, J = 8.6 Hz, CH), 124.4 (d, J = 2.7 Hz, CH), 114.5 (d, J = 25.6 Hz, CH), 87.2 (d, J = 26.2 Hz, C), 69.9 (d, J = 1.6 Hz, C), 62.6 (CH<sub>2</sub>), 39.6 (CH<sub>2</sub>), 36.3 (CH<sub>2</sub>), 19.5 (CH<sub>2</sub>), 14.0 (CH<sub>3</sub>) ppm. <sup>19</sup>F{<sup>1</sup>H} NMR (470 MHz, CDCl<sub>3</sub>): δ = –84.60 ppm. IR (ATR): λ<sup>-1</sup> = 2980 (w), 1752 (s), 1710 (vs), 1223 (vs), 527 (s) cm<sup>-1</sup>. MS (EI, 70 eV): m/z (%) 376 (40) [M<sup>+</sup>], 348 (10), 250 (94), 222 (20), 193 (51), 177 (40), 162 (23), 148 (75), 135 (97), 121 (100), 109 (30), 101 (36), 75 (8), 55 (23). HRMS (EI, 70 eV): calcd. 375.9966 (for C<sub>14</sub>H<sub>14</sub>FIO<sub>3</sub><sup>+</sup>), found 375.9966 [M<sup>+</sup>].

### 3.14 Ethyl 1-(5-bromo-2-iodophenyl)-2-oxocyclopentane-1-carboxylate (**5k**)

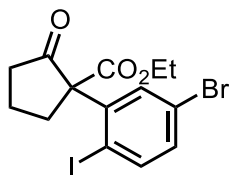

According to GPB, 4-bromophenyl iodine bis(trifluoroacetate) (**9k**) (1.81 g, 3.56 mmol), ethyl 2-oxocyclopentane-1-carboxylate (**1a**) (0.41 mL, 0.43 g, 2.7 mmol) and TFAA (0.57 mL, 0.86 g, 4.1 mmol) were converted to furnish compound **5k** (534 mg, 1.22 mmol, 45%) after column chromatography (SiO<sub>2</sub>, hexanes/MTBE 5:1, R<sub>f</sub> = 0.32) as a colorless oil. <sup>1</sup>H NMR (300 MHz, CDCl<sub>3</sub>): δ = 7.76–7.73 (m, 1 H), 7.09–7.06 (m, 2 H), 4.27–4.12 (m, 2 H), 3.21 (ddd, J = 13.6 Hz, J = 9.0 Hz, J = 7.1 Hz, 1 H), 2.57–2.51 (m, 2 H), 2.47–2.39 (m, 1 H), 2.17–2.04 (m, 1 H), 1.81–1.66 (m, 1 H), 1.22 (t, J = 7.2 Hz, 3 H) ppm. <sup>13</sup>C{<sup>1</sup>H} NMR (75 MHz, CDCl<sub>3</sub>): δ = 212.9 (C), 168.9 (C), 143.8 (C), 143.1 (CH), 132.0 (CH), 131.8 (CH), 122.6 (C), 96.8 (C), 69.6 (C), 62.6 (CH<sub>2</sub>), 39.5 (CH<sub>2</sub>), 36.1 (CH<sub>2</sub>), 19.4 (CH<sub>2</sub>), 14.0 (CH<sub>3</sub>) ppm. IR (ATR): λ<sup>-1</sup> = 2979 (w), 1718 (s), 1227 (s), 1008 (s) cm<sup>-1</sup>. MS (EI, 70 eV): m/z (%) 436 (13) [M<sup>+</sup>], 408 (12), 381 (22), 353 (21), 337 (24), 309 (100), 281 (42), 253 (44), 235 (38), 226 (46), 211 (27), 186

(29), 180 (31), 128 (68), 115 (60), 101 (44), 75 (38), 63 (18), 55 (47). HRMS (EI, 70 eV): calcd. 435.9166 (for C<sub>14</sub>H<sub>14</sub>BrIO<sub>3</sub><sup>+</sup>), found 435.9157 [M<sup>+</sup>].

### 3.15 Ethyl 1-(2-iodo-5-trifluoromethylphenyl)-2-oxocyclopentane-1-carboxylate (**5l**)

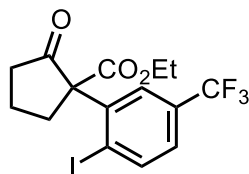

According to GPB, 4-trifluoromethylphenyliodine bis(trifluoroacetate) (**9l**) (1.56 g, 3.13 mmol), ethyl 2-oxocyclopentane-1-carboxylate (**1a**) (0.36 mL, 0.38 g, 2.4 mmol) and TFAA (0.50 mL, 0.76 g, 3.6 mmol) were converted to furnish compound **5l** (404 mg, 0.948 mmol, 39%) after column chromatography (SiO<sub>2</sub>, hexanes/MTBE 5:1, R<sub>f</sub> = 0.32) as a colorless oil. <sup>1</sup>H NMR (500 MHz, CDCl<sub>3</sub>): δ = 8.06–8.05 (m, 1 H), 7.20–7.18 (m, 2 H), 4.23–4.17 (m, 2 H), 3.25 (ddd, *J* = 13.6 Hz, *J* = 8.5 Hz, *J* = 7.1 Hz, 1 H), 2.58–2.54 (m, 2 H), 2.47–2.42 (m, 1 H), 2.17–2.09 (m, 1 H), 1.79–1.70 (m, 1 H), 1.22 (t, *J* = 7.1 Hz, 3 H) ppm. <sup>13</sup>C{<sup>1</sup>H} NMR (125 MHz, CDCl<sub>3</sub>): δ = 212.5 (C), 168.9 (C), 143.0 (C), 142.6 (CH), 130.6 (q, *J* = 32.8 Hz, C), 125.5 (q, *J* = 3.6 Hz, CH), 125.1 (q, *J* = 3.6 Hz, CH), 123.7 (q, *J* = 273.3 Hz, CF<sub>3</sub>), 103.3 (C), 69.7 (C), 62.6 (CH<sub>2</sub>), 39.5 (CH<sub>2</sub>), 36.2 (CH<sub>2</sub>), 19.4 (CH<sub>2</sub>), 13.9 (CH<sub>3</sub>) ppm. <sup>19</sup>F{<sup>1</sup>H} NMR (470 MHz, CDCl<sub>3</sub>): δ = –62.90 (CF<sub>3</sub>) ppm. IR (ATR): λ<sup>-1</sup> = 2982 (w), 1749 (w), 1717 (vs), 1713 (vs), 1224 (s), 1126 (vs), 1093 (s), 1083 (s), 1011 (s) cm<sup>-1</sup>. HRMS (LIFDI): calcd. 425.9934 (for C<sub>15</sub>H<sub>14</sub>F<sub>3</sub>IO<sub>3</sub><sup>+</sup>), found 425.9934 [M<sup>+</sup>].

### 3.16 Ethyl 1-(2-iodo-5-methoxycarbonylphenyl)-2-oxocyclopentane-1-carboxylate (**5m**)

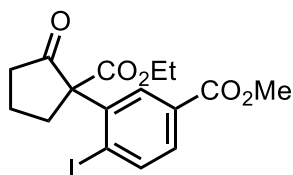

According to GPB, 4-methoxycarbonylphenyliodine bis(trifluoroacetate) (**9m**) (0.45 g, 0.91 mmol), ethyl 2-oxocyclopentane-1-carboxylate (**1a**) (0.11 g, 0.70 mmol) and TFAA (0.22 g, 1.1 mmol) were converted to furnish compound **5m** (237 mg, 0.570 mmol, 81%) after column chromatography (SiO<sub>2</sub>, hexanes/MTBE 5:1, R<sub>f</sub> = 0.14) as a colorless oil. <sup>1</sup>H NMR (300 MHz, CDCl<sub>3</sub>): δ = 8.01–7.98 (m, 1 H), 7.57–7.54 (m, 2 H), 4.23–4.10 (m, 2 H), 3.83 (s, 3 H), 3.19 (ddd, *J* = 13.5 Hz, *J* = 9.2 Hz, *J* = 7.1 Hz, 1 H), 2.66–2.40 (m, 3 H), 2.16–2.05 (m, 1 H), 1.79–1.63 (m, 1 H), 1.19 (t, *J* = 7.1 Hz, 3 H) ppm. <sup>13</sup>C{<sup>1</sup>H} NMR (75 MHz, CDCl<sub>3</sub>): δ = 212.8 (C), 169.1 (C), 166.1 (C), 142.22 (CH), 142.21 (C), 130.1 (C), 129.5 (CH), 129.2 (CH), 105.1 (C), 69.7 (C), 62.5 (CH<sub>2</sub>), 52.4 (CH<sub>3</sub>), 39.4 (CH<sub>2</sub>), 36.0 (CH<sub>2</sub>), 19.4 (CH<sub>2</sub>), 13.9 (CH<sub>3</sub>) ppm. IR (ATR): λ<sup>-1</sup> = 2982 (w), 2954 (w), 2900 (w), 1741 (m), 1710 (vs), 1257 (s), 1223 (s), 1084 (s), 754 (s) cm<sup>-1</sup>. MS (EI, 70 eV): *m/z* (%) 416 (80) [M<sup>+</sup>], 388 (23), 359 (20), 329 (61), 314 (46),

301 (75), 289 (100), 282 (70), 261 (39), 257 (20), 233 (28), 215 (34), 205 (37), 191 (28), 174 (38), 128 (78), 115 (51), 101 (23), 55 (33). HRMS (EI, 70 eV): calcd. 416.0115 (for  $C_{16}H_{17}IO_5^+$ ), found 416.0110 [ $M^+$ ].

## 4. Synthesis of PIFA derivatives 9

### 4.1 General procedure C (GPC) for the synthesis of PIFA derivatives 9

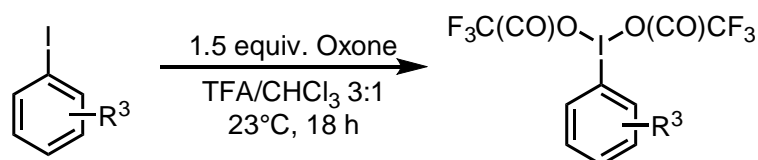

Following the procedure published by Zagulyaeva *et al.*,<sup>[S8]</sup> oxone (1.5 equiv.) was added to a solution of the iodobenzene derivative (1.0 equiv.) in TFA (1.5 L mol<sup>-1</sup>) and  $CHCl_3$  (0.5 L mol<sup>-1</sup>). The resulting mixture was stirred for 18 h at 23 °C. All volatiles were removed *in vacuo* and the crude product was extracted with  $CHCl_3$  (15 L mol<sup>-1</sup>). The solvent was evaporated to give the PIFA derivatives **9i–9m**.

### 4.2 2-Methylphenyliodine bis(trifluoroacetate) (9i)

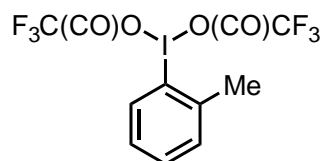

According to GPC, oxone (4.24 g, 13.8 mmol) and *ortho*-iodotoluene (2.00 g, 9.17 mmol) were converted to furnish compound **9i** (2.65 g, 5.97 mmol, 65%) as a light yellow solid (mp 95–96 °C). <sup>1</sup>H NMR (300 MHz,  $CDCl_3$ ):  $\delta$  = 8.27 (d,  $J$  = 8.2 Hz, 1 H), 7.68–7.60 (m, 2 H), 7.35 (td,  $J$  = 8.4 Hz,  $J$  = 2.2 Hz, 1 H), 2.79 (s, 3 H) ppm. The spectroscopic data are in accordance with literature values.<sup>[S5]</sup>

### 4.3 2-Fluorophenyliodine bis(trifluoroacetate) (9j)

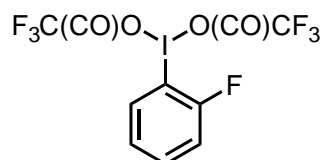

According to GPC, oxone (4.15 g, 13.5 mmol) and 2-fluoroiodobenzene (2.00 g, 9.01 mmol) were converted to furnish compound **9j** (2.51 g, 5.60 mmol, 62%) as a colorless solid (mp 129–132 °C). <sup>1</sup>H NMR (500 MHz,  $CDCl_3$ ):  $\delta$  = 8.27 (ddd,  $J$  = 8.1 Hz,  $J$  = 5.6 Hz,  $J$  = 1.5 Hz, 1 H), 7.79–7.74 (m, 1 H), 7.51 (td,  $J$  = 8.3 Hz,  $J$  = 1.4 Hz, 1 H), 7.38 (td,  $J$  = 7.7 Hz,  $J$  = 1.4 Hz, 1 H) ppm. <sup>13</sup>C{<sup>1</sup>H} NMR (125 MHz,  $CDCl_3$ ):  $\delta$  = 161.5 (q,  $J$  = 41.6 Hz, C), 159.2 (d,  $J$  = 257.7 Hz, C), 137.2 (d,  $J$  = 8.1 Hz, CH), 137.1 (CH), 127.4 (d,  $J$  = 3.2 Hz, CH), 117.4 (d,  $J$  = 21.6

Hz, CH), 113.1 (q,  $J = 287.6$  Hz,  $\text{CF}_3$ ), 110.2 (d,  $J = 22.4$  Hz, C) ppm.  $^{19}\text{F}\{^1\text{H}\}$  NMR (470 MHz,  $\text{CDCl}_3$ ):  $\delta = -73.45$  (2  $\text{CF}_3$ ),  $-94.12$  (CF) ppm. IR (ATR):  $\lambda^{-1} = 3096$  (w), 1704 (s), 1663 (s), 1136 (vs), 1114 (vs)  $\text{cm}^{-1}$ . MS (EI, 70 eV):  $m/z$  (%) 335 (45)  $[\text{M}-\text{F}_3\text{CCO}_2]^+$ , 253 (35), 222 (100), 208 (15), 127 (10), 111 (15), 95 (98), 75 (80), 69 (71), 50 (24), 45 (29).

#### 4.4 4-Bromophenyl iodine bis(trifluoroacetate) (**9k**)

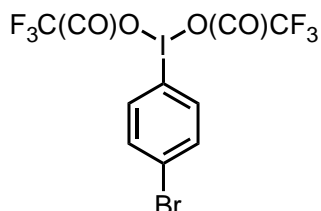

According to GPC, oxone (3.26 g, 10.6 mmol) and 4-bromiodobenzene (2.00 g, 7.07 mmol) were converted to furnish compound **9k** (1.81 g, 3.56 mmol, 50%) as a colorless solid (mp 122–123 °C).  $^1\text{H}$  NMR (300 MHz,  $\text{CDCl}_3$ ):  $\delta = 8.07$ – $8.04$  (m, 2 H), 7.76–7.73 (m, 2 H) ppm. The spectroscopic data are in accordance with literature values.<sup>[S8]</sup>

#### 4.5 4-Trifluoromethylphenyl iodine bis(trifluoroacetate) (**9l**)

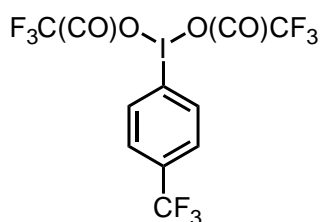

According to GPC, oxone (3.38 g, 11.0 mmol) and 4-trifluoromethyl iodobenzene (2.00 g, 7.35 mmol) were converted to furnish compound **9l** (1.56 g, 3.13 mmol, 43%) as a colorless solid (mp 120–122 °C).  $^1\text{H}$  NMR (300 MHz,  $\text{CDCl}_3 + 1$  vol% TFA):  $\delta = 8.36$ – $8.33$  (m, 2 H), 7.89–7.87 (m, 2 H) ppm. The spectroscopic data are in accordance with literature values.<sup>[S8]</sup>

#### 4.6 4-Methoxycarbonylphenyl iodine bis(trifluoroacetate) (**9m**)

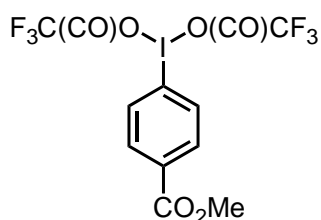

According to GPC, oxone (1.23 g, 4.01 mmol) and methyl 4-iodobenzoate (700 mg, 2.67 mmol) were converted to furnish compound **9m** (445 mg, 0.911 mmol, 39%) as a colorless solid (mp 127–129 °C).  $^1\text{H}$  NMR (300 MHz,  $\text{CDCl}_3$ ):  $\delta = 8.25$  (s, 4 H), 3.99 (s, 3 H) ppm. The spectroscopic data are in accordance with literature values.<sup>[S5]</sup>

## 5. Computational Details

All quantum chemical calculations were carried out using the Gaussian16 package.<sup>[S9]</sup> The molecular structure optimizations were performed using the M06-2X functional<sup>[S10]</sup> along with the Def2-TZVP basis set.<sup>[S11]</sup> Every stationary point was identified by a subsequent frequency calculation either as a minimum (Number of imaginary frequencies NIMAG = 0) or as a transition state (NIMAG = 1). Transition states were connected to the appropriate minima by following the intrinsic reaction coordinate (IRC) using the algorithm as implemented in the Gaussian16 program package.<sup>[S12]</sup> In the case of the TS transforming **11** into **12**, the imaginary frequency was inspected. The structure of the stationary point was distorted along this vibrational mode in both directions. The resulting two structures were optimized giving **11** and **12** as minima. The solvent was modeled using the polarizable continuum model (PCM) in the self-consistent reaction field method (SCRF) for the parameters provided by the Gaussian16 package for *N,N*-dimethyl formamide (DMF).<sup>[S13]</sup> Table S2 summarizes the RHF energies  $E^{\text{RHF}}$ , and the absolute Gibbs energies  $G^{298}$  [T = 298.15 K, p = 0.101 MPa (1 atm)] obtained with this method for all optimized structures. Relative energies and Gibbs energies,  $E^{\text{rel}}$  and  $G^{298,\text{rel}}$ , are calculated using the respective quantities of compound **11** or **14** as reference points. The corresponding computed molecular structures are given in the xyz-files and are ordered by the reaction scheme numbers.

**Table S2.** Calculated absolute and relative SCRF energies ( $E$ ,  $E^{\text{rel}}$ ) and free enthalpies at 298 K ( $G^{298}$ ,  $G^{298,\text{rel}}$ ) for compounds and transition states (TS) of interest. The results for SCRF computations were obtained with DMF as solvent.  $E^{\text{rel}}$  and  $G^{298,\text{rel}}$  are calculated relative to the energies of compound **11** (grey background) or **14** (white).

| Compound or TS              | $E^{\text{RHF}}$ (a.u.) | $G^{298}$ (a.u.) | NIMAG ( $\tilde{\nu}$ / $\text{cm}^{-1}$ ) | $E^{\text{rel}}$ / $\text{kJ mol}^{-1}$ | $G^{298,\text{rel}}$ / $\text{kJ mol}^{-1}$ |
|-----------------------------|-------------------------|------------------|--------------------------------------------|-----------------------------------------|---------------------------------------------|
| <b>11</b>                   | -1138.03517             | -1137.74121      | 0                                          | 0                                       | 0                                           |
| TS( <b>11</b> → <b>12</b> ) | -1138.03264             | -1137.73821      | 1 (-56)                                    | +7                                      | +8                                          |
| <b>12</b>                   | -1138.14288             | -1137.84332      | 0                                          | -283                                    | -268                                        |
| TS( <b>12</b> → <b>13</b> ) | -1138.06166             | -1137.75998      | 1 (-122)                                   | -69                                     | -49                                         |
| ( <i>E</i> )- <b>13</b>     | -1138.14170             | -1137.84434      | 0                                          | -279                                    | -272                                        |
| ( <i>Z</i> )- <b>13</b>     | -1138.14405             | -1137.84574      | 0                                          | -286                                    | -274                                        |
| <b>14</b>                   | -805.89723              | -805.66922       | 0                                          | 0                                       | 0                                           |
| TS( <b>14</b> → <b>15</b> ) | -805.86965              | -805.64585       | 1 (-928)                                   | +72                                     | +61                                         |
| ( <i>E</i> )- <b>15</b>     | -805.89414              | -805.66888       | 0                                          | +8                                      | +1                                          |
| ( <i>Z</i> )- <b>15</b>     | -805.89461              | -805.66893       | 0                                          | +7                                      | +1                                          |
| <b>2a'</b>                  | -805.92718              | -805.70063       | 0                                          | -79                                     | -82                                         |



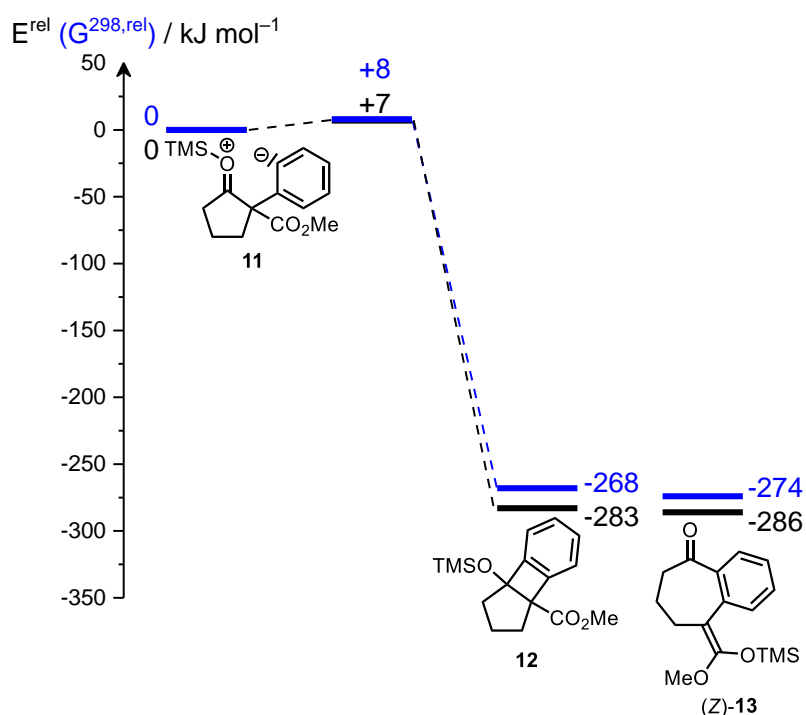

**Figure S2.** Calculated reaction path for the formation of the product **13** from zwitterion **11**. Relative energies  $E^{\text{rel}}$  (black) and Gibbs energies  $G^{298,\text{rel}}$  (blue) are computed at the M06-2X/Def2-TZVP level with DMF as solvent and are given relative to the values of zwitterion **11**.

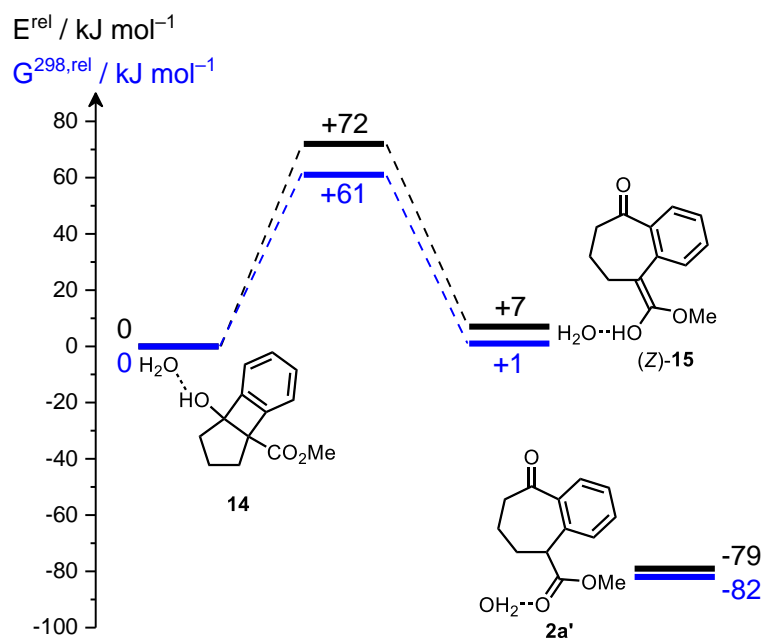

**Figure S3.** Calculated reaction path for the formation of the product **2a'** from compound **14**. Relative energies  $E^{\text{rel}}$  (black) and Gibbs energies  $G^{298,\text{rel}}$  (blue) are computed at the M06-2X/Def2-TZVP level with DMF as solvent and are given relative to the values of compound **14**.

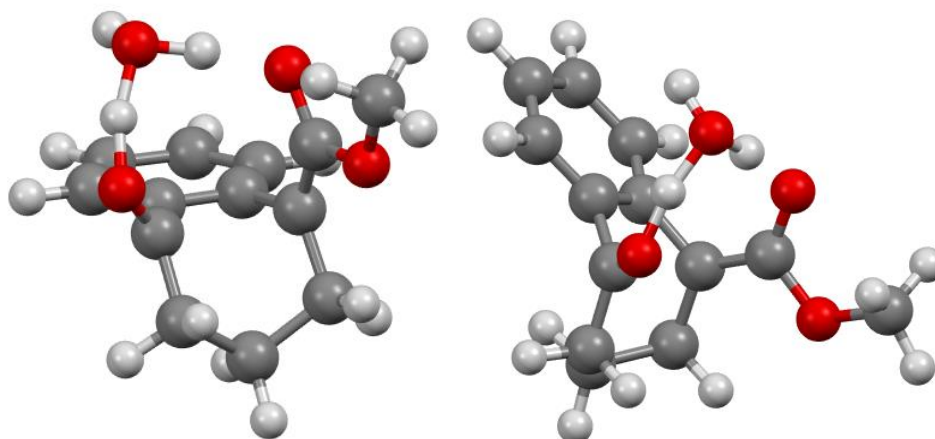

**Figure S4.** Calculated structure for the transition state **14**→**15**.

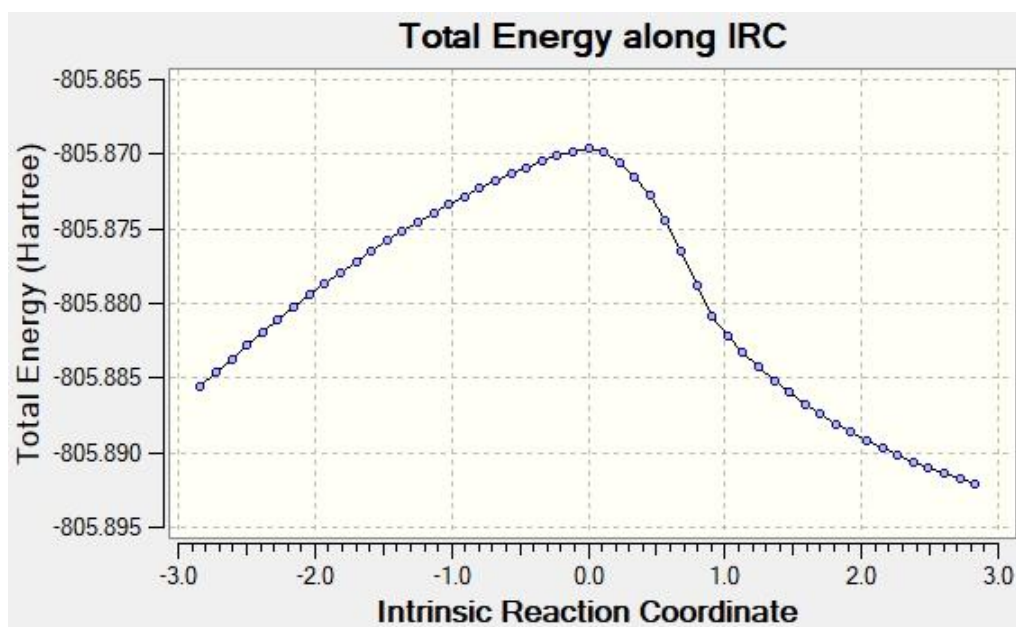

**Figure S5.** Graphical representation of the IRC path calculation for the formation of **15** from **14** [M06-2X/Def2-TZVP SCRF].

## 6. References

- [S1] I. Geibel, J. Christoffers, *Eur. J. Org. Chem.* **2016**, 918–920.
- [S2] U. K. Tambar, B. M. Stoltz, *J. Am. Chem. Soc.* **2005**, *127*, 5340–5341.
- [S3] J. H. Kim, H. Shin, S.-g. Lee, *J. Org. Chem.* **2012**, *77*, 1560–1565.
- [S4] Q. Chen, H. Yu, Z. Xu, L. Lin, X. Jiang, R. Wang, *J. Org. Chem.* **2015**, *80*, 6890–6896.
- [S5] Z. Jia, E. Gálvez, R. M. Sebastián, R. Pleixats, Á. Álvarez-Larena, E. Martín, A. Vallribera, A. Shafir, *Angew. Chem. Int. Ed.* **2014**, *53*, 11298–11301; *Angew. Chem.* **2014**, *126*, 11480–11483.
- [S6] F. Barabe, G. Betournay, G. Bellavance, L. Barriault, *Org. Lett.* **2009**, *11*, 4236–4238.
- [S7] G. Chouhan, H. Alper, *Org. Lett.* **2008**, *10*, 4987–4990.
- [S8] A. A. Zagulyaeva, M. S. Yusubov, V. V. Zhdankin, *J. Org. Chem.* **2010**, *75*, 2119–2122.
- [S9] M. J. Frisch, G. W. Trucks, H. B. Schlegel, G. E. Scuseria, M. A. Robb, J. R. Cheeseman, G. Scalmani, V. Barone, B. Mennucci, G. A. Petersson, H. Nakatsuji, M. Caricato, X. Li, H. P. Hratchian, A. F. Izmaylov, J. Bloino, G. Zheng, J. L. Sonnenberg, M. Hada, M. Ehara, K. Toyota, R. Fukuda, J. Hasegawa, M. Ishida, T. Nakajima, Y. Honda, O. Kitao, H. Nakai, T. Vreven, J. A. Montgomery, Jr., J. E. Peralta, F. Ogliaro, M. Bearpark, J. J. Heyd, E. Brothers, K. N. Kudin, V. N. Staroverov, T. Keith, R. Kobayashi, J. Normand, K. Raghavachari, A. Rendell, J. C. Burant, S. S. Iyengar, J. Tomasi, M. Cossi, N. Rega, J. M. Millam, M. Klene, J. E. Knox, J. B. Cross, V. Bakken, C. Adamo, J. Jaramillo, R. Gomperts, R. E. Stratmann, O. Yazyev, A. J. Austin, R. Cammi, C. Pomelli, J. W. Ochterski, R. L. Martin, K. Morokuma, V. G. Zakrzewski, G. A. Voth, P. Salvador, J. J. Dannenberg, S. Dapprich, A. D. Daniels, O. Farkas, J. B. Foresman, J. V. Ortiz, J. Cioslowski, D. J. Fox, Gaussian 09, Revision D.01., Inc., Wallingford CT, 2013.
- [S10] Y. Zhao, N. E. Schultz, D. G. Truhlar, *J. Chem. Theory Comput.* **2006**, *2*, 364–382.
- [S11] a) F. Weigend, R. Ahlrichs, *Phys. Chem. Chem. Phys.* **2005**, *7*, 3297–3305; b) D. Andrae, U. Häußermann, M. Dolg, H. Stoll, H. Preuss, *Theor. Chim. Acta* **1990**, *77*, 123–141; c) B. Metz, H. Stoll, M. Dolg, *J. Chem. Phys.* **2000**, *113*, 2563–2569.
- [S12] K. Fukui, *Acc. Chem. Res.* **1981**, *14*, 363–368.
- [S13] J. Tomasi, B. Mennucci, R. Cammi, *Chem. Rev.* **2005**, *105*, 2999–3093.

## 7. NMR-Spectra of all Reported Compounds

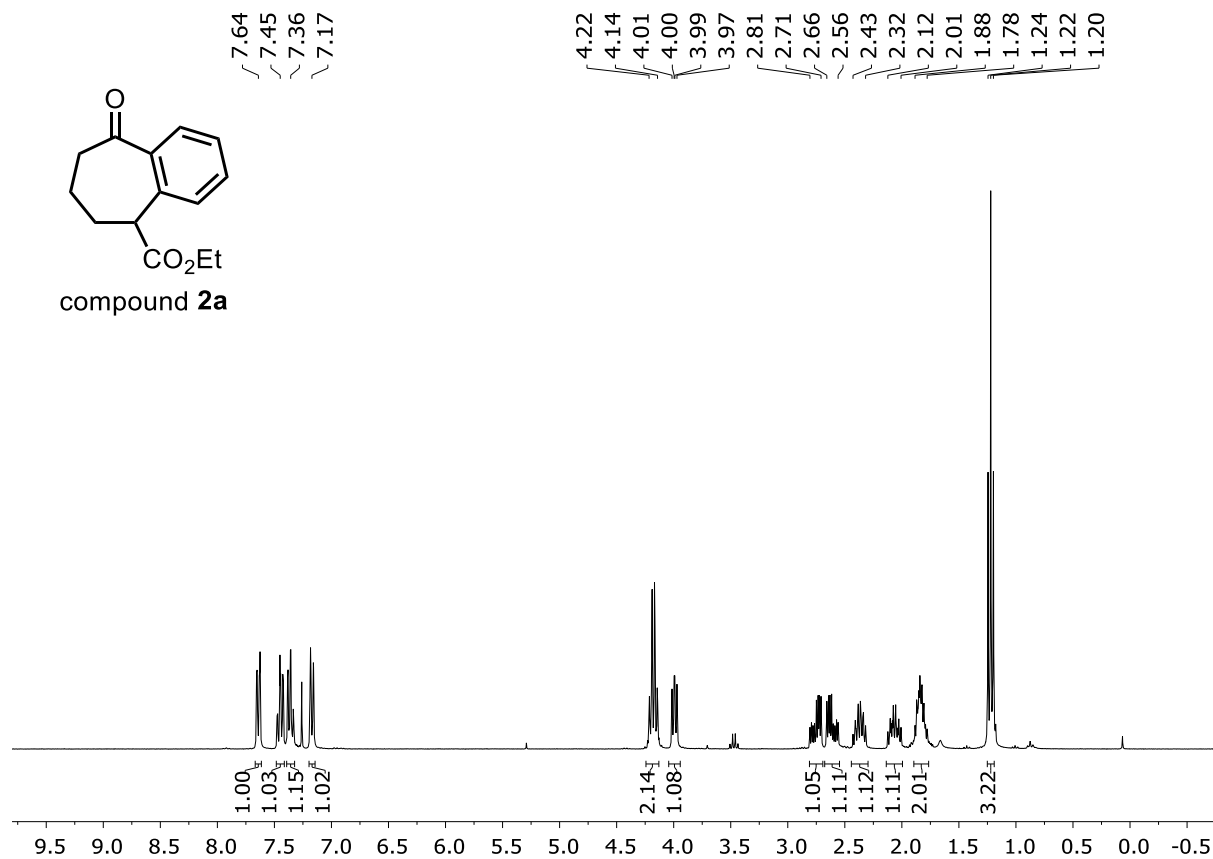

<sup>1</sup>H NMR (300 MHz, CDCl<sub>3</sub>) of compound **2a**.

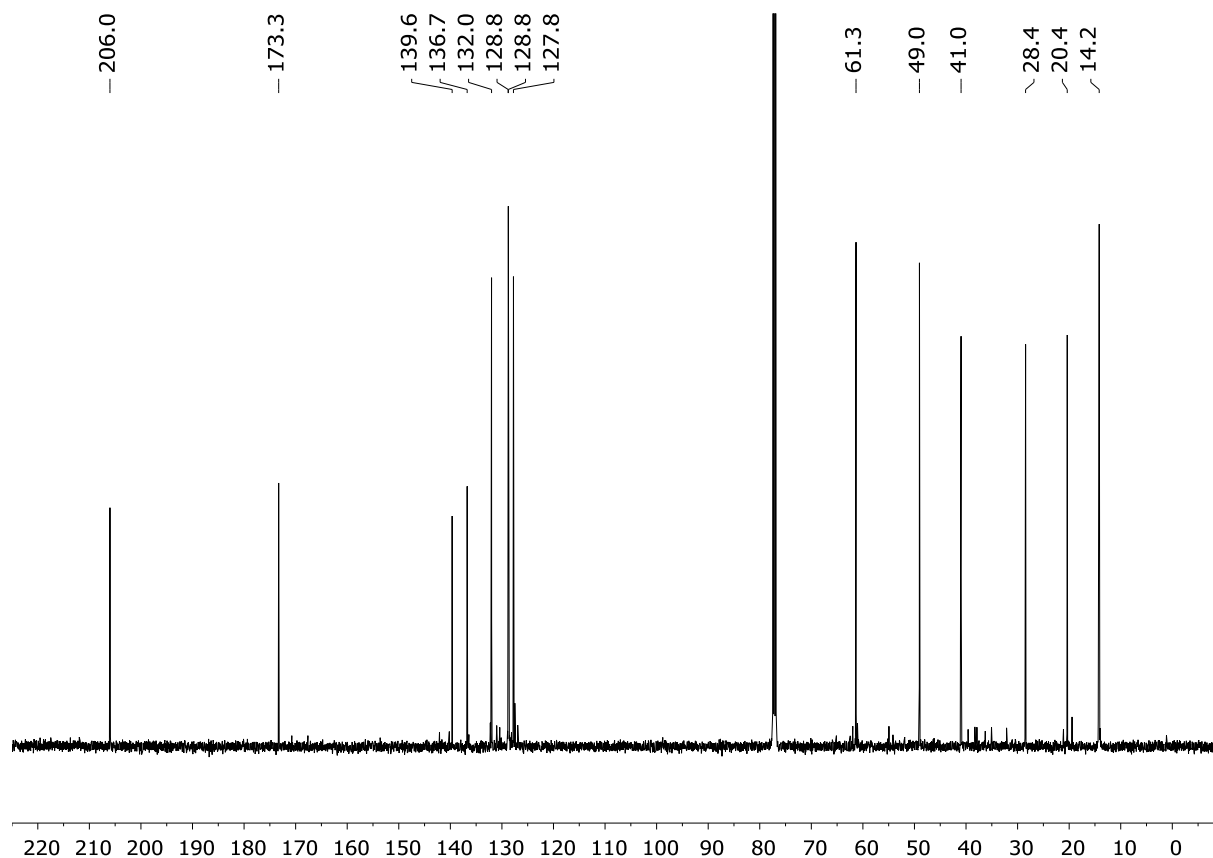

<sup>13</sup>C{<sup>1</sup>H} NMR (125 MHz, CDCl<sub>3</sub>) of compound **2a**.

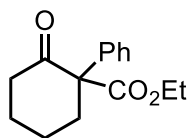

compound **8**

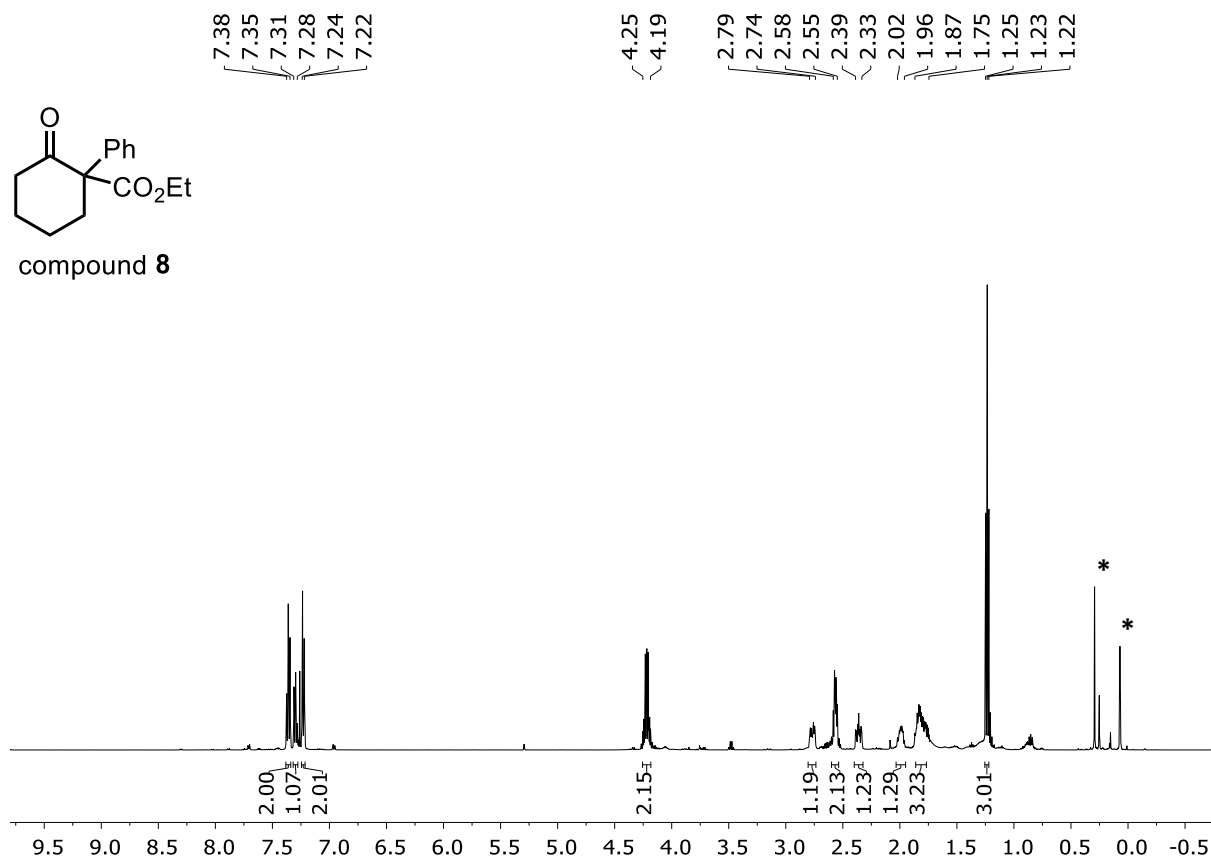

$^1\text{H}$  NMR (500 MHz,  $\text{CDCl}_3$ ) of compound **8**. \*Impurities from the solvent.

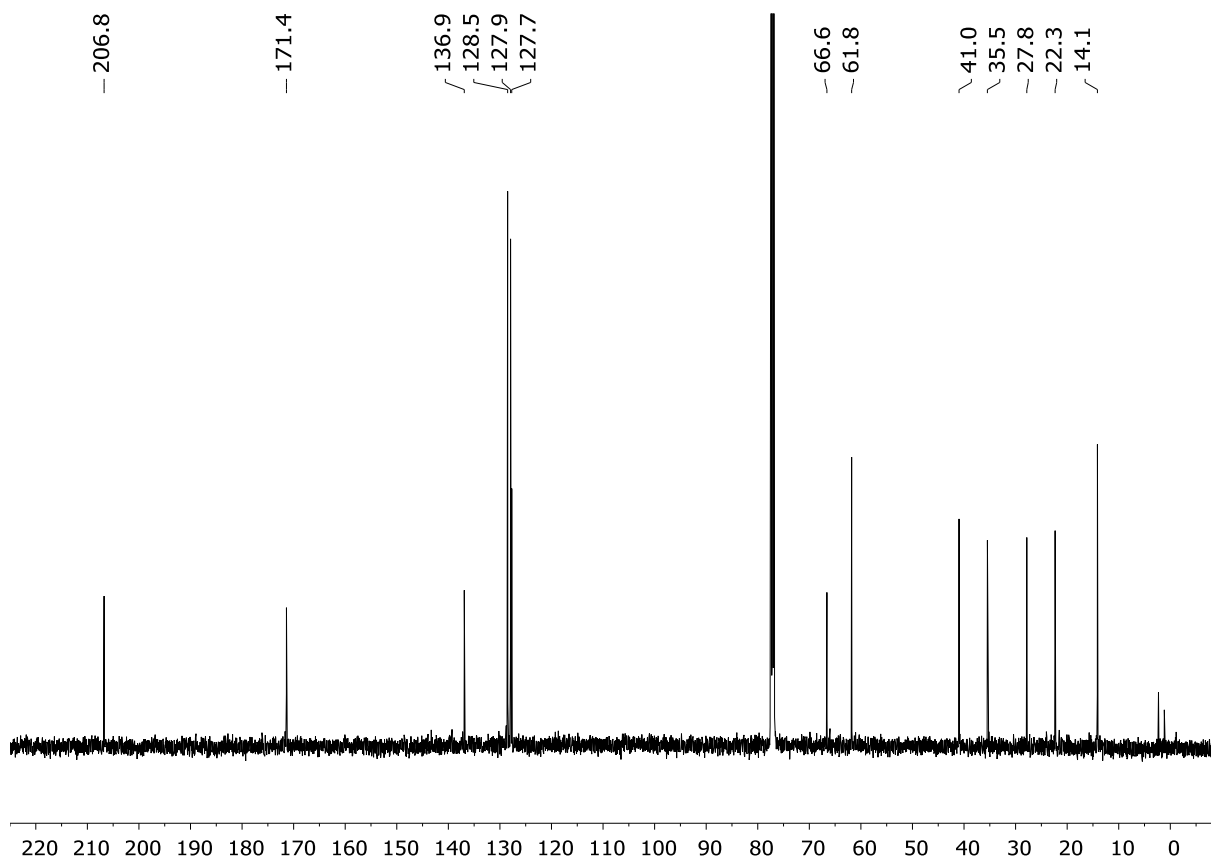

$^{13}\text{C}\{^1\text{H}\}$  NMR (125 MHz,  $\text{CDCl}_3$ ) of compound **8**.

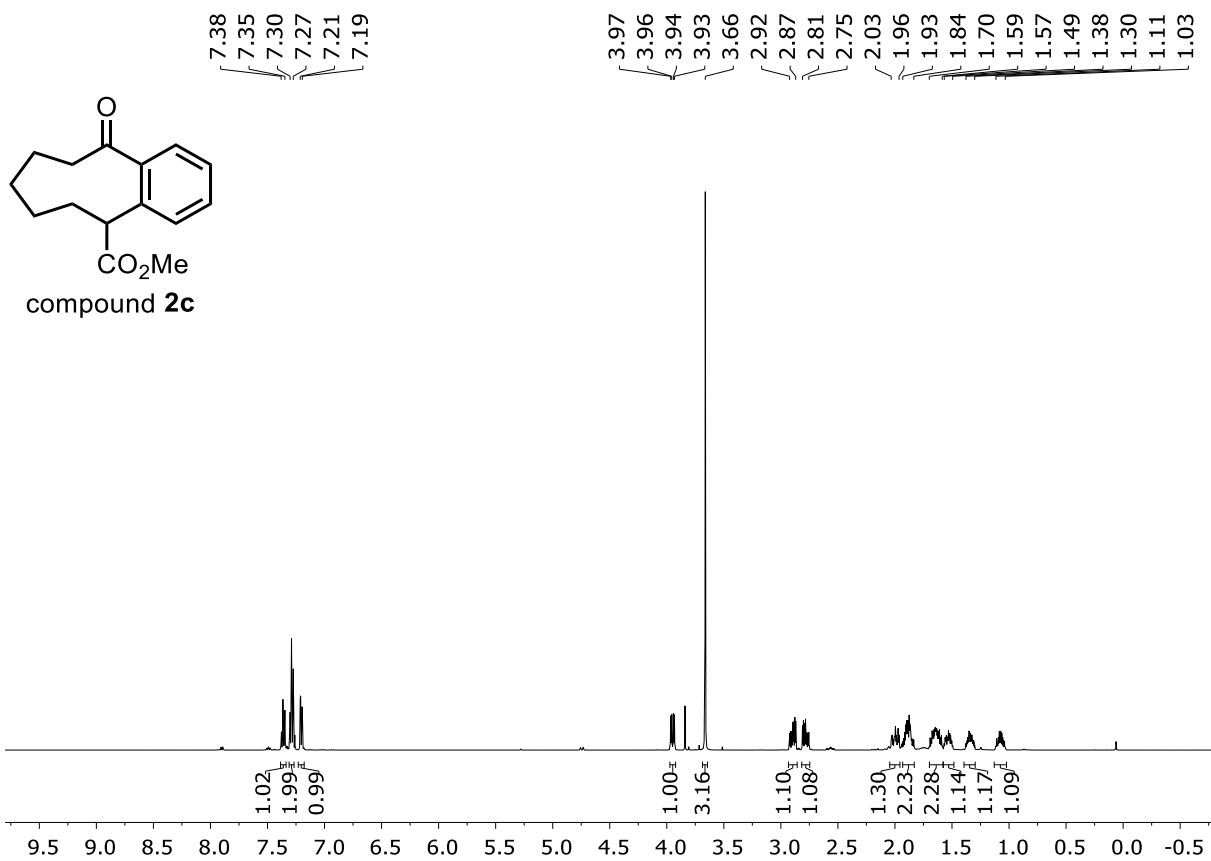

<sup>1</sup>H NMR (500 MHz, CDCl<sub>3</sub>) of compound **2c**.

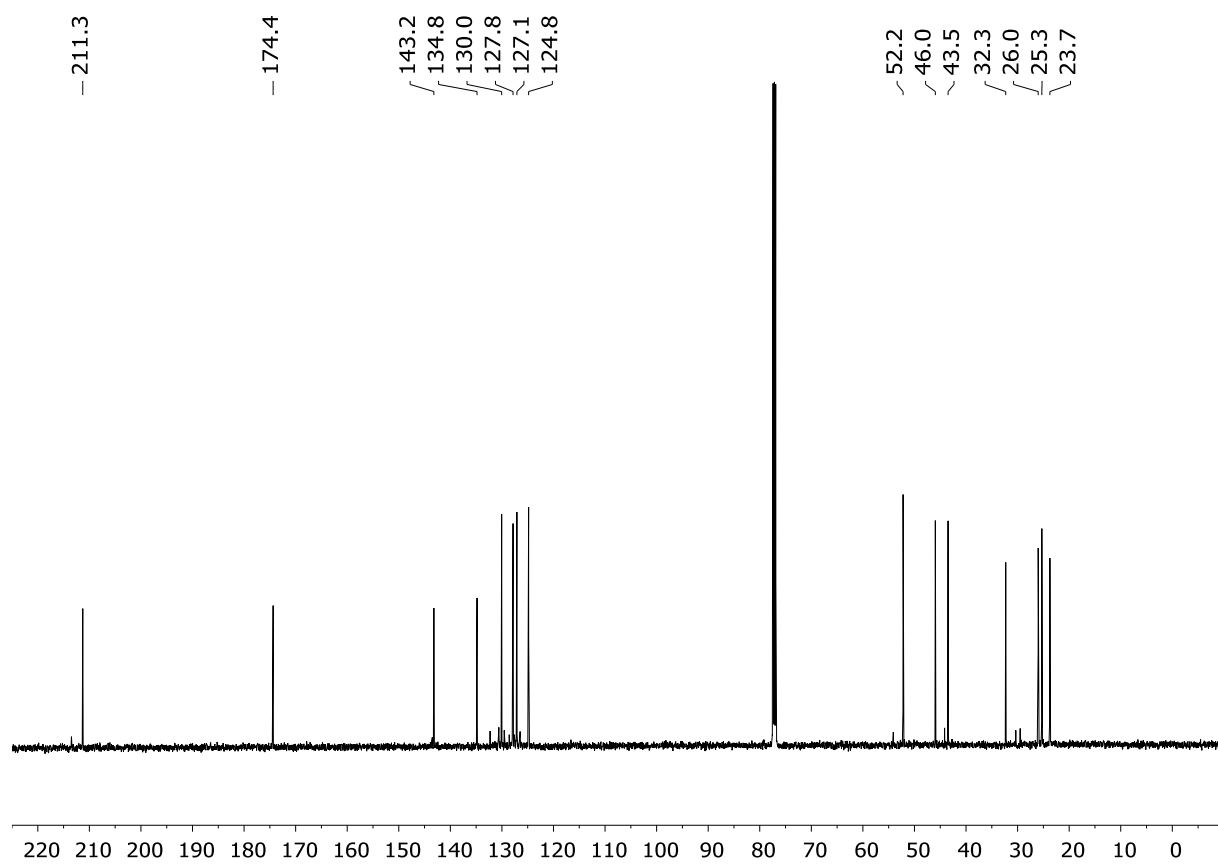

<sup>13</sup>C{<sup>1</sup>H} NMR (125 MHz, CDCl<sub>3</sub>) of compound **2c**.

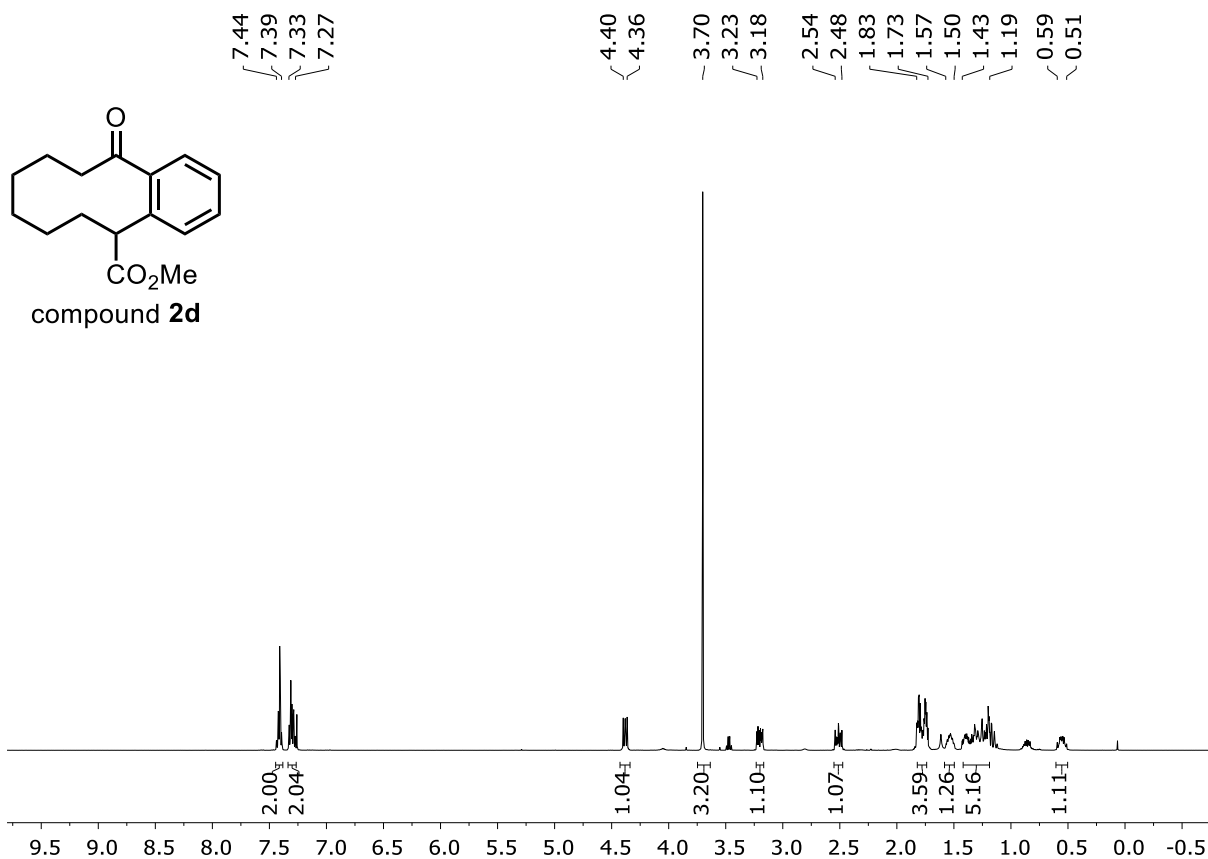

$^1\text{H}$  NMR (500 MHz,  $\text{CDCl}_3$ ) of compound **2d**.

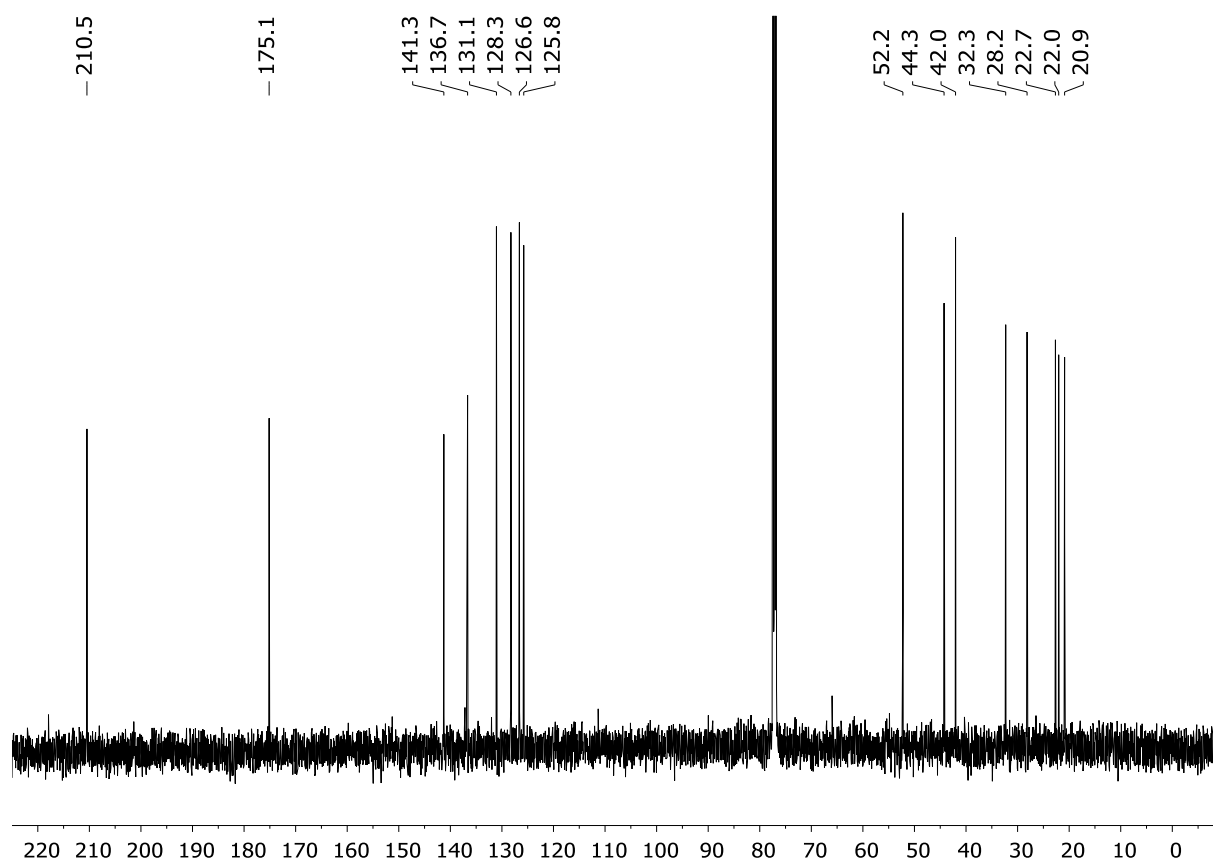

$^{13}\text{C}\{^1\text{H}\}$  NMR (125 MHz,  $\text{CDCl}_3$ ) of compound **2d**.

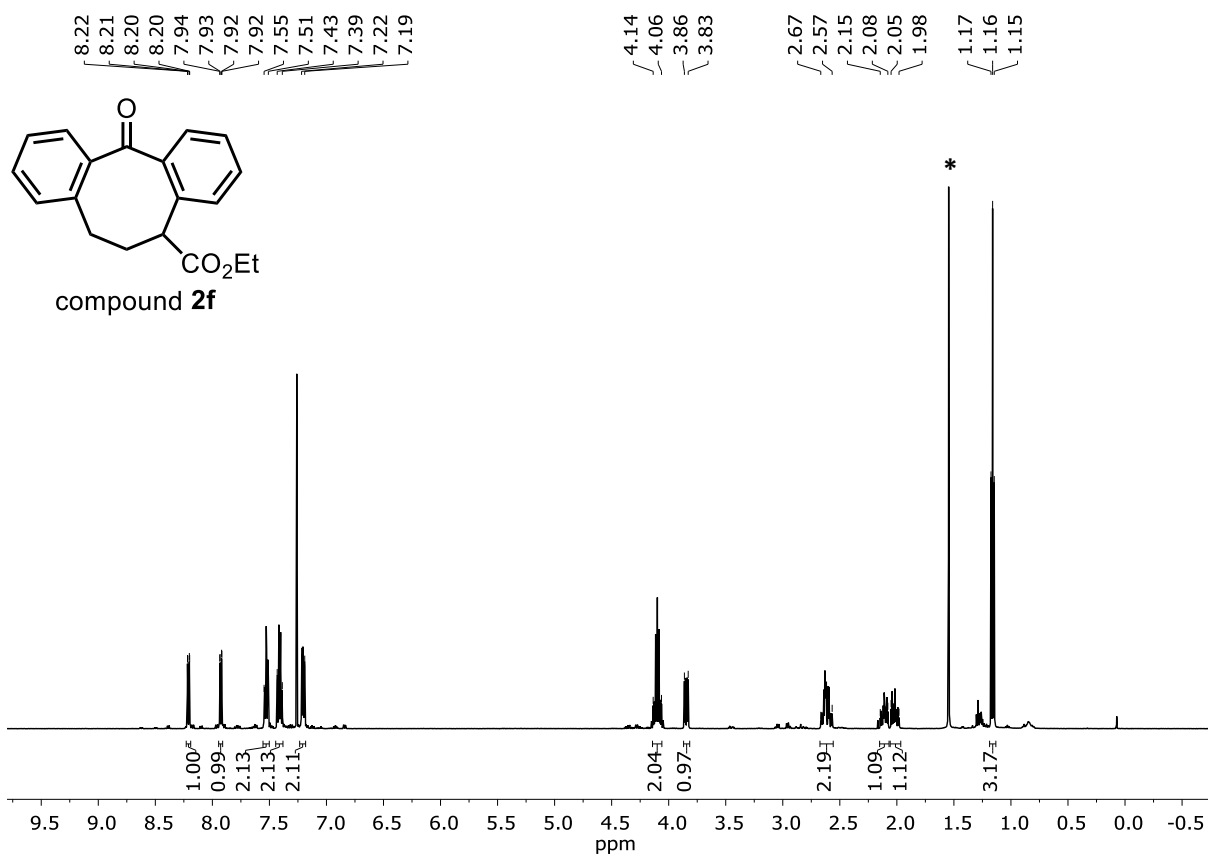

$^1\text{H}$  NMR (500 MHz,  $\text{CDCl}_3$ ) of compound **2f**. \*Impurities from the solvent.

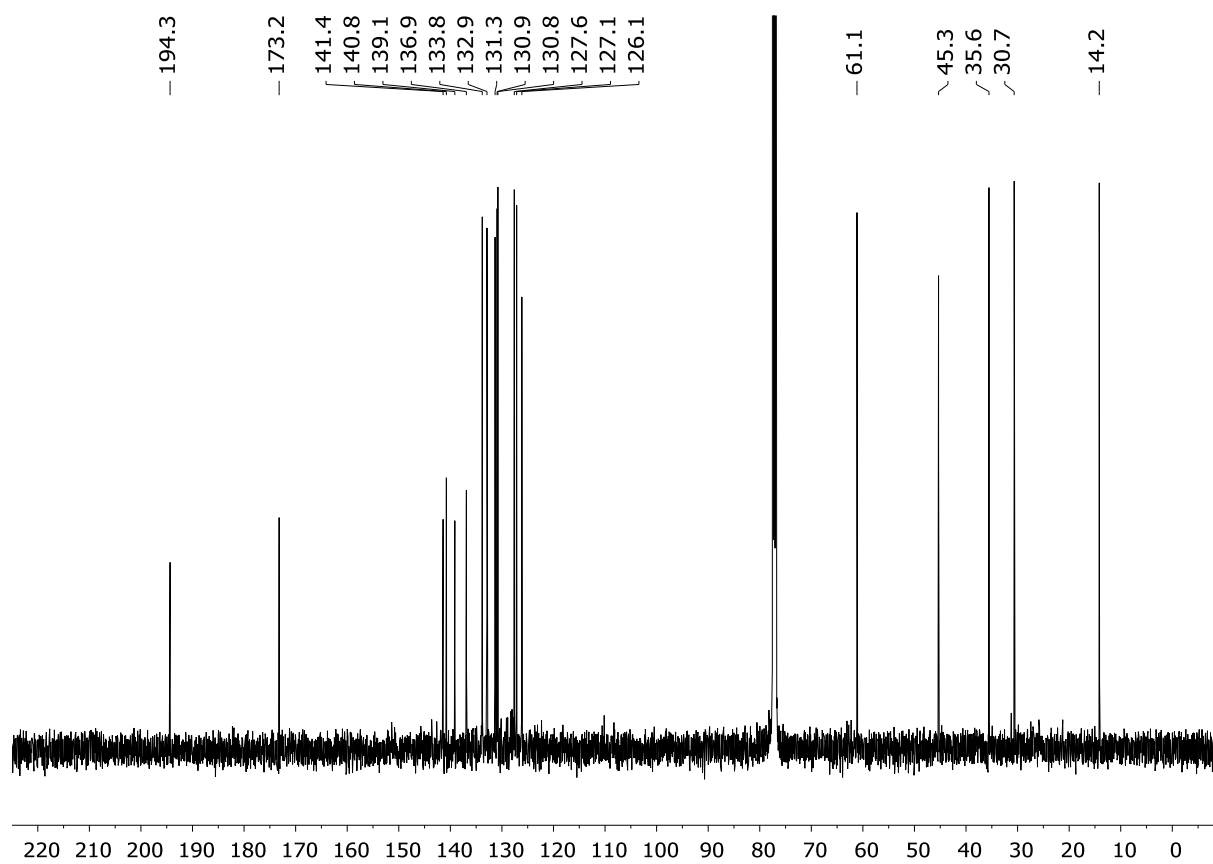

$^{13}\text{C}\{^1\text{H}\}$  NMR (125 MHz,  $\text{CDCl}_3$ ) of compound **2f**.



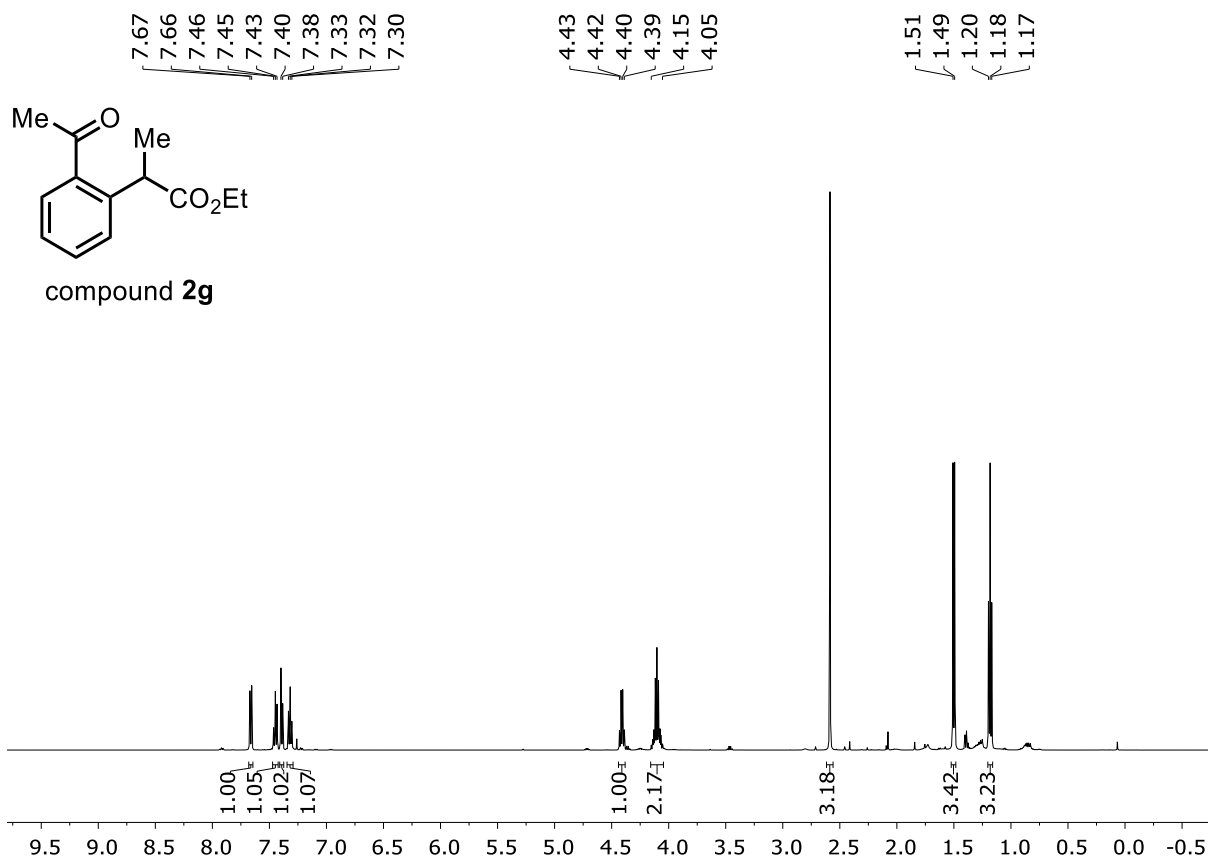

<sup>1</sup>H NMR (500 MHz, CDCl<sub>3</sub>) of compound **2g**.

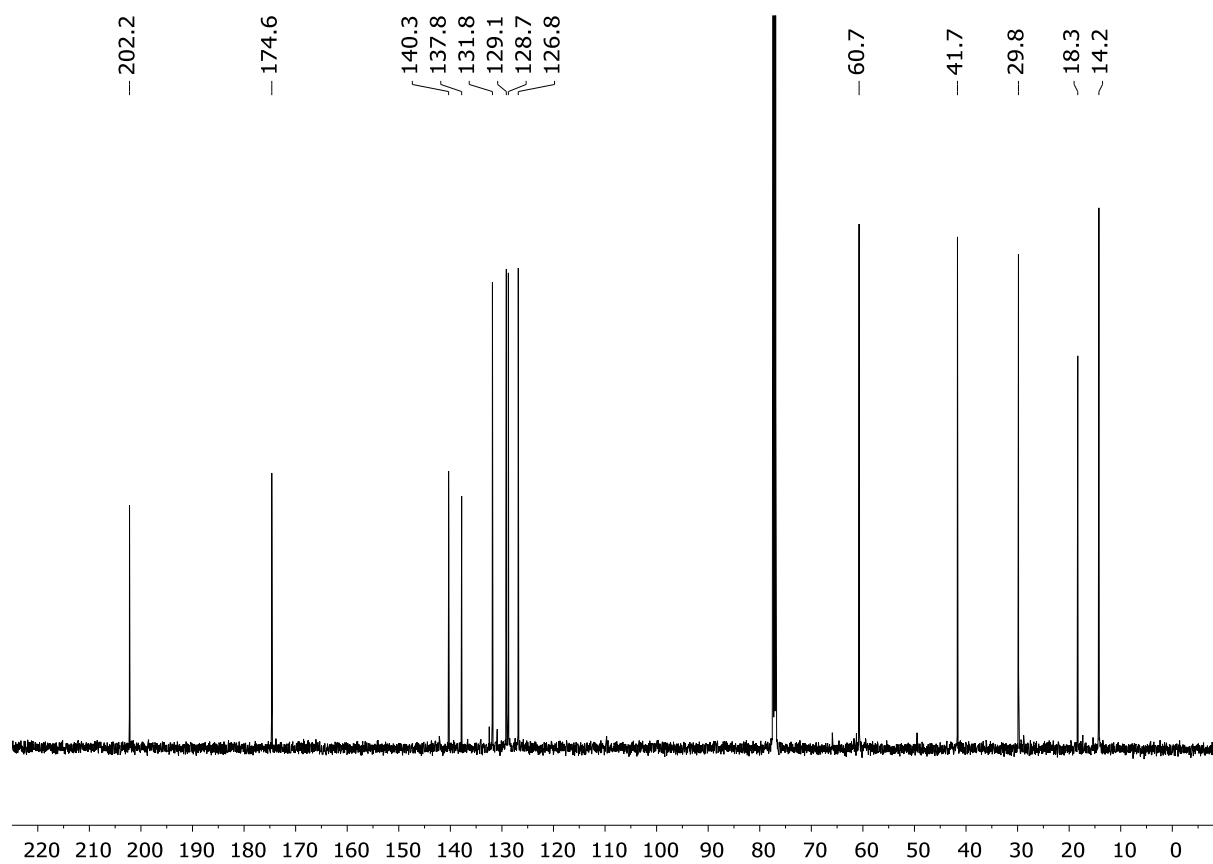

<sup>13</sup>C{<sup>1</sup>H} NMR (125 MHz, CDCl<sub>3</sub>) of compound **2g**.

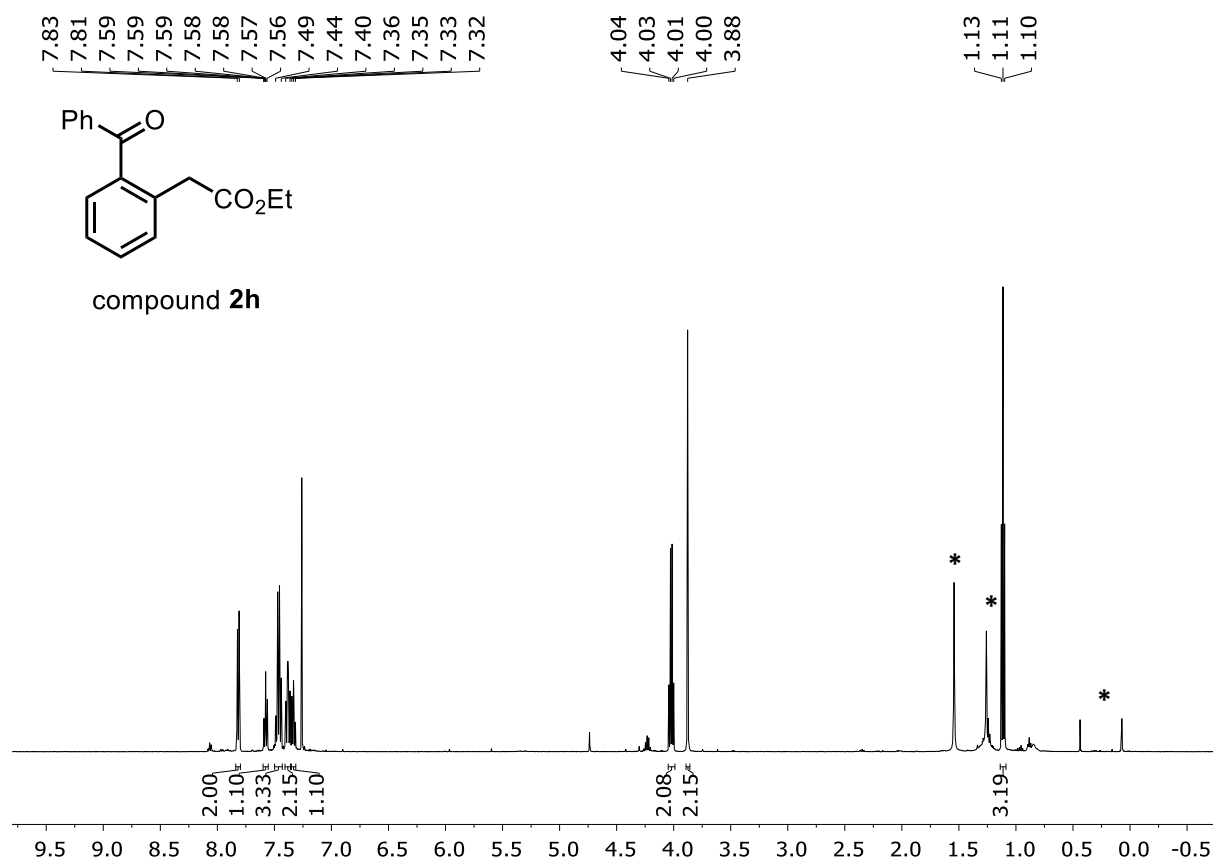

<sup>1</sup>H NMR (500 MHz, CDCl<sub>3</sub>) of compound **2h**. \*Impurities from the solvent.

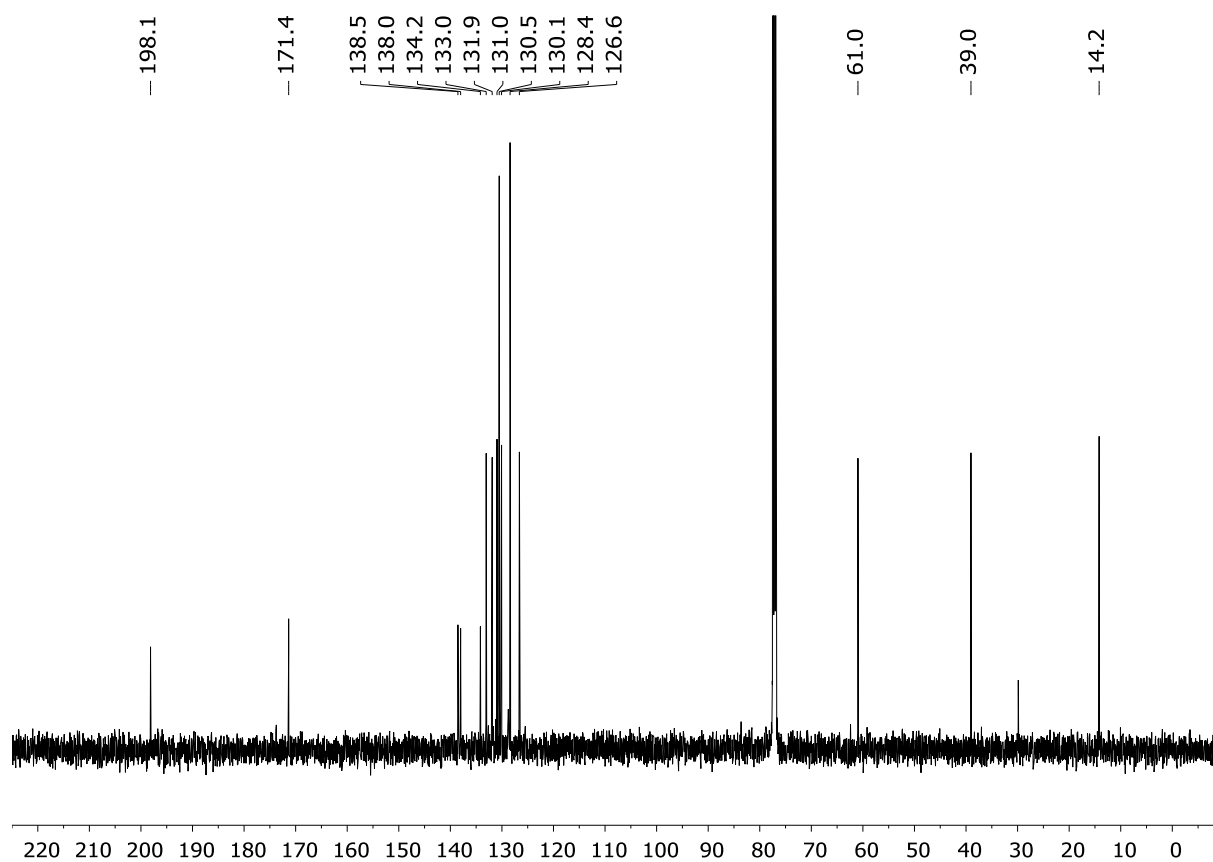

<sup>13</sup>C{<sup>1</sup>H} NMR (125 MHz, CDCl<sub>3</sub>) of compound **2h**.

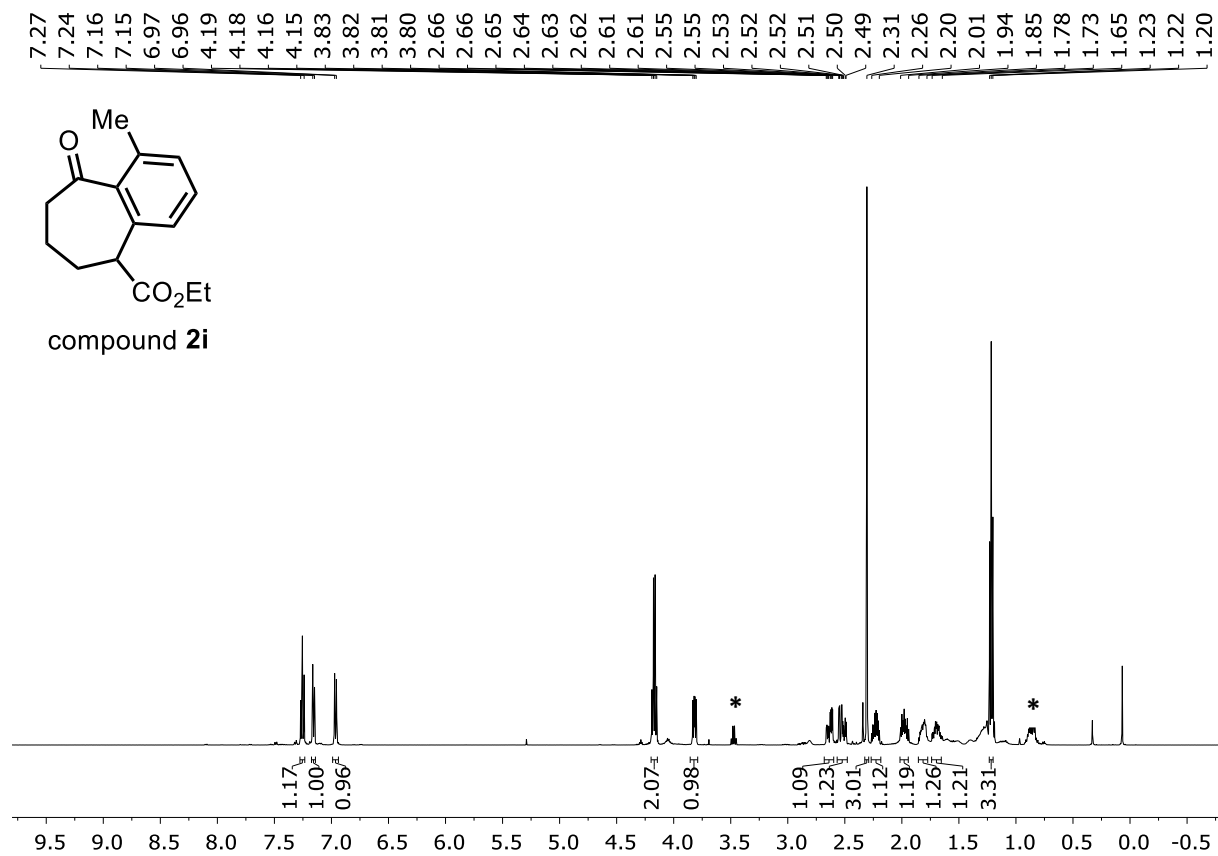

$^1\text{H}$  NMR (500 MHz,  $\text{CDCl}_3$ ) of compound **2i**. \*Residual peaks from diethyl ether.

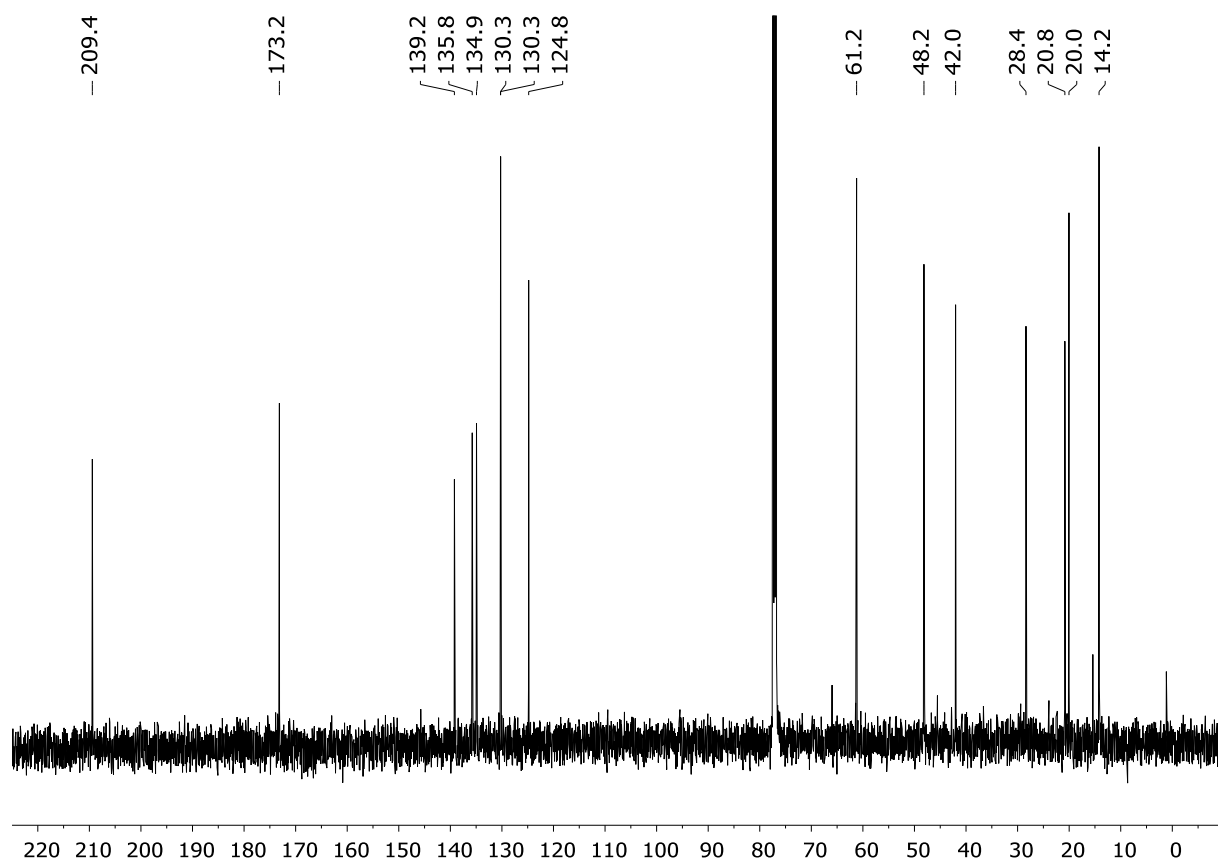

$^{13}\text{C}\{^1\text{H}\}$  NMR (125 MHz,  $\text{CDCl}_3$ ) of compound **2i**.

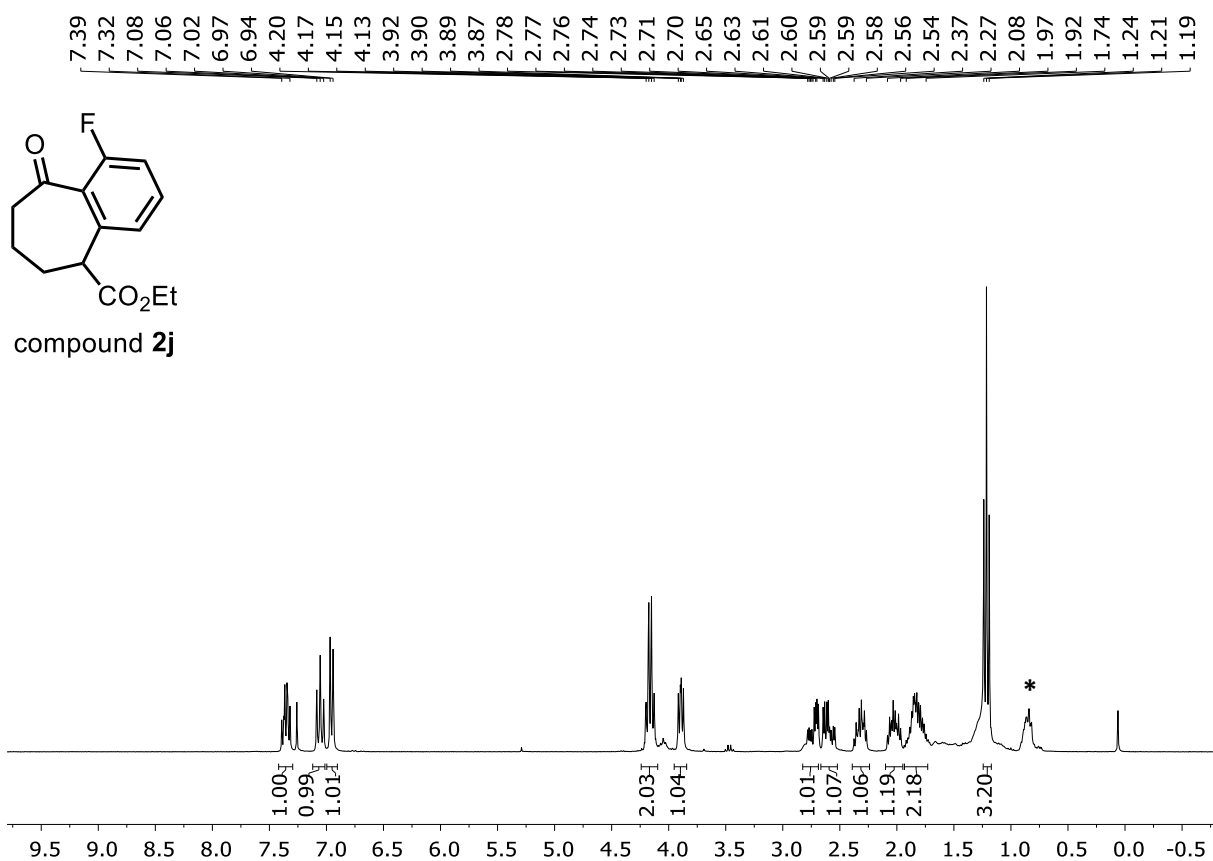

$^1\text{H}$  NMR (500 MHz,  $\text{CDCl}_3$ ) of compound **2j**. \*Impurities from the solvent.

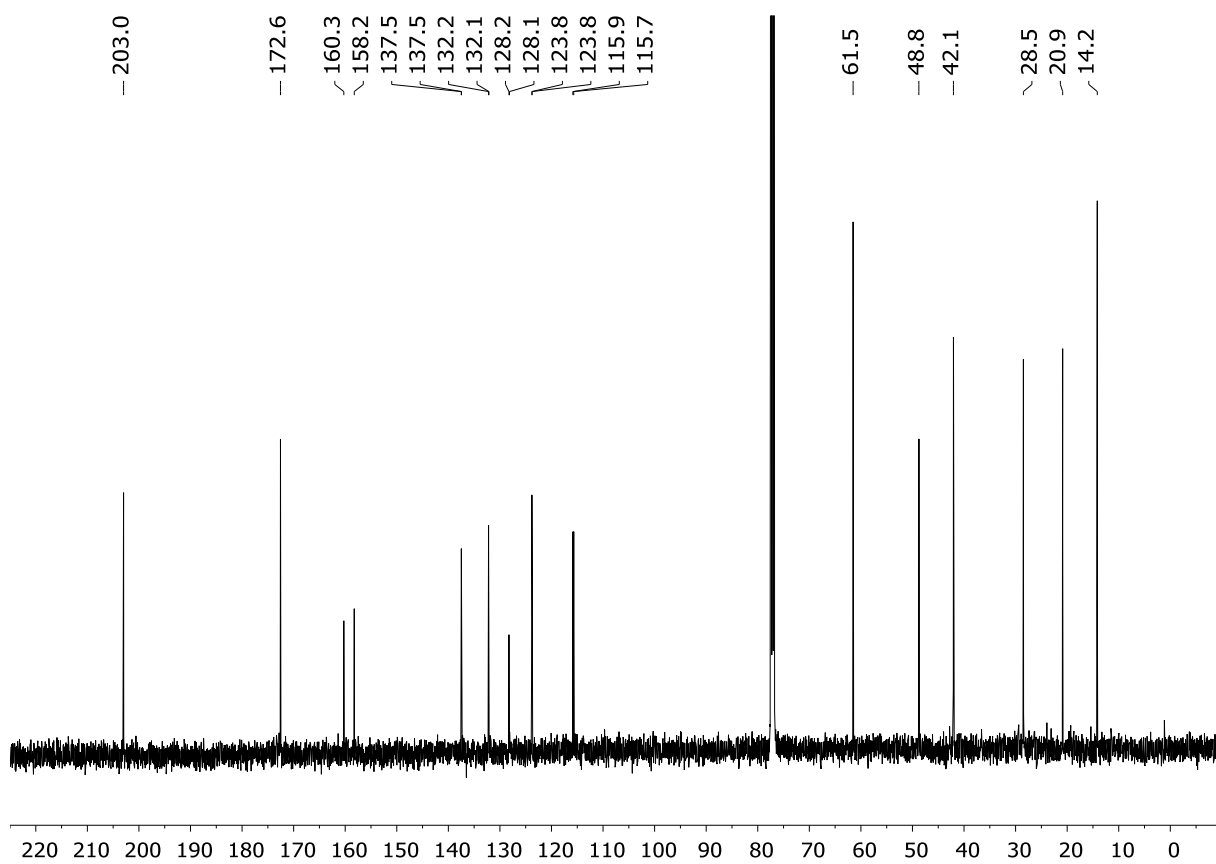

$^{13}\text{C}\{^1\text{H}\}$  NMR (125 MHz,  $\text{CDCl}_3$ ) of compound **2j**.

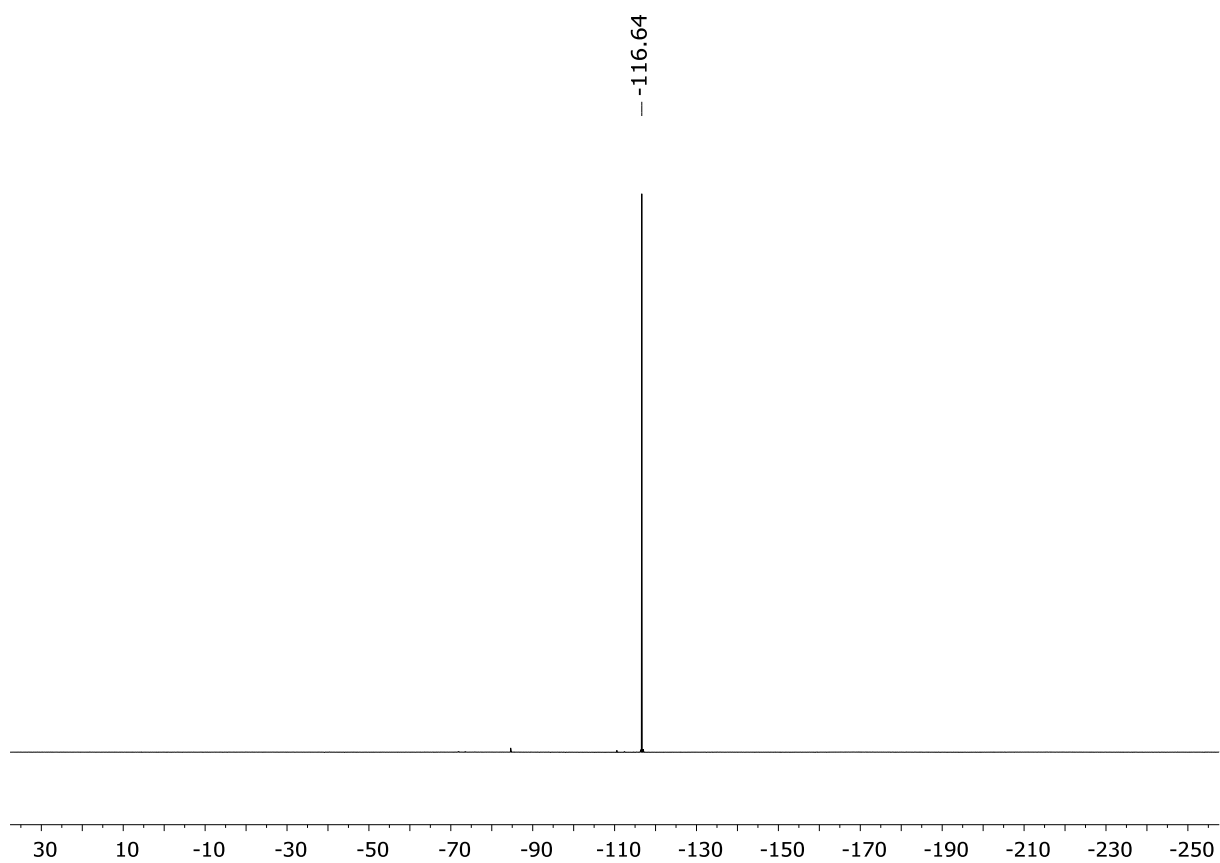

$^{19}\text{F}\{^1\text{H}\}$  NMR (470 MHz,  $\text{CDCl}_3$ ) of compound **2j**.

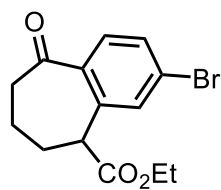

compound **2k**

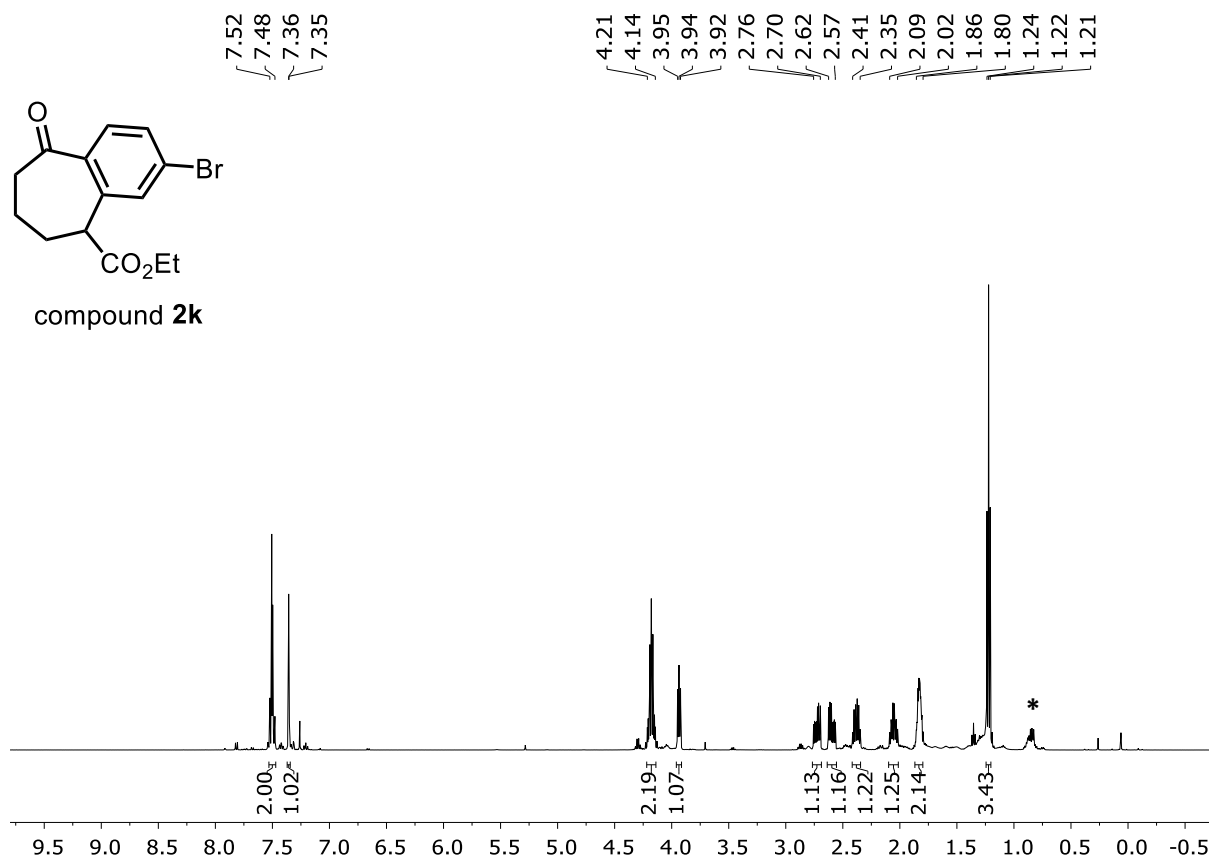

<sup>1</sup>H NMR (500 MHz, CDCl<sub>3</sub>) of compound **2k**. \*Impurities from the solvent.

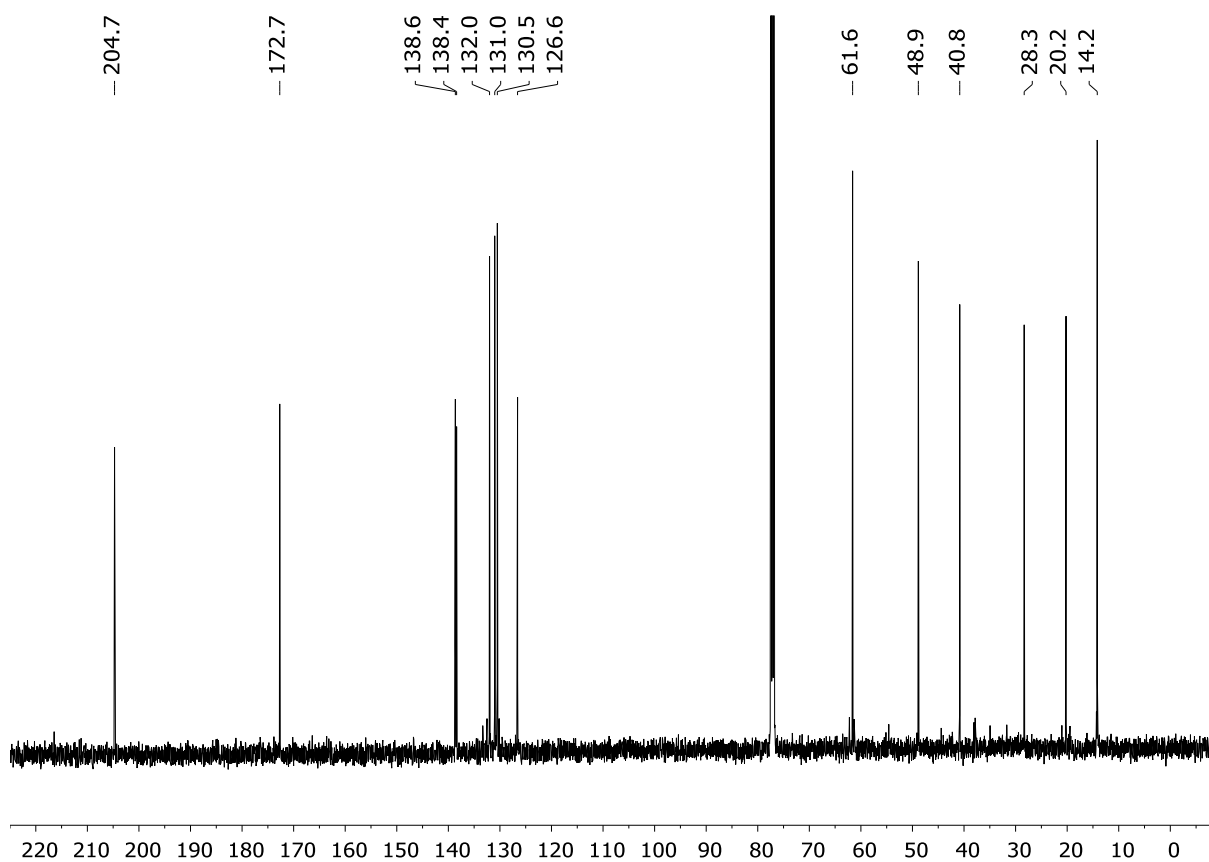

<sup>13</sup>C NMR (125 MHz, CDCl<sub>3</sub>) of compound **2k**.

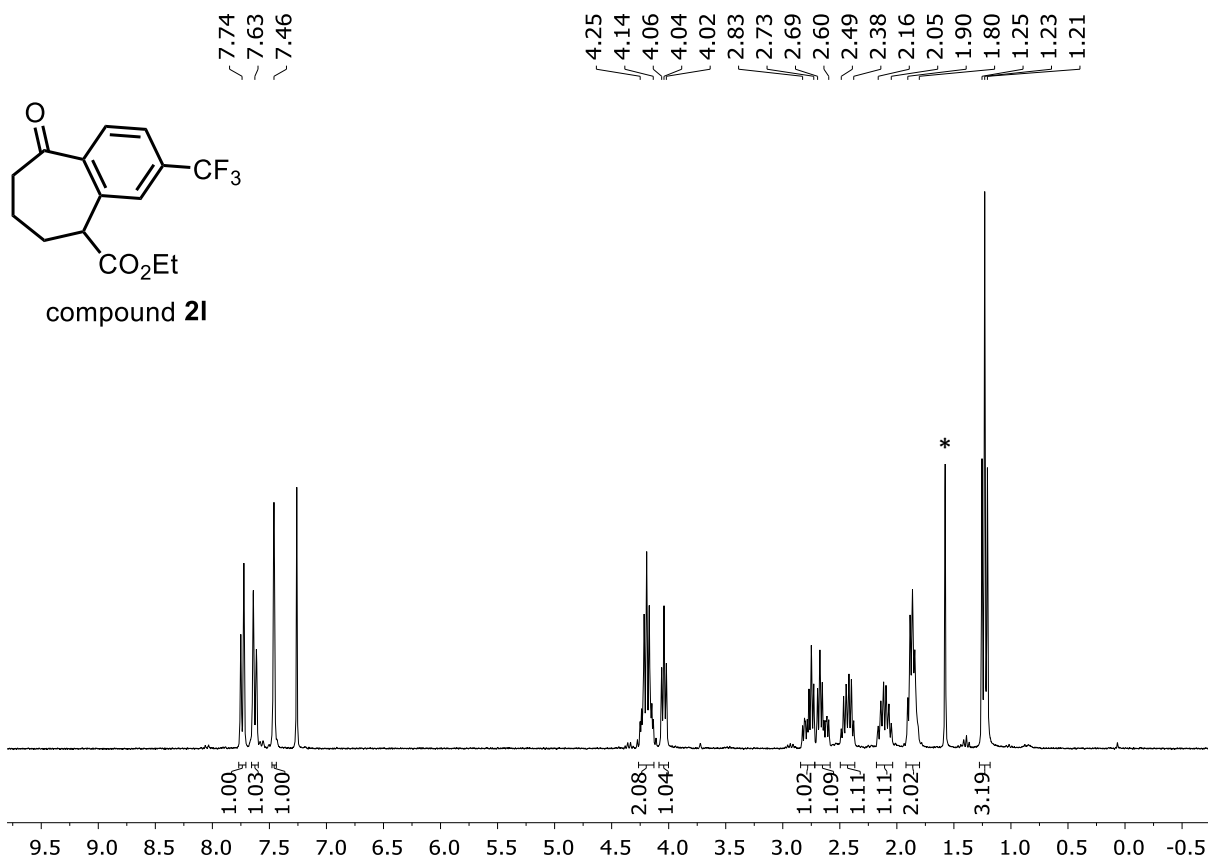

<sup>1</sup>H NMR (300 MHz, CDCl<sub>3</sub>) of compound **2I**. \*Impurities from the solvent.

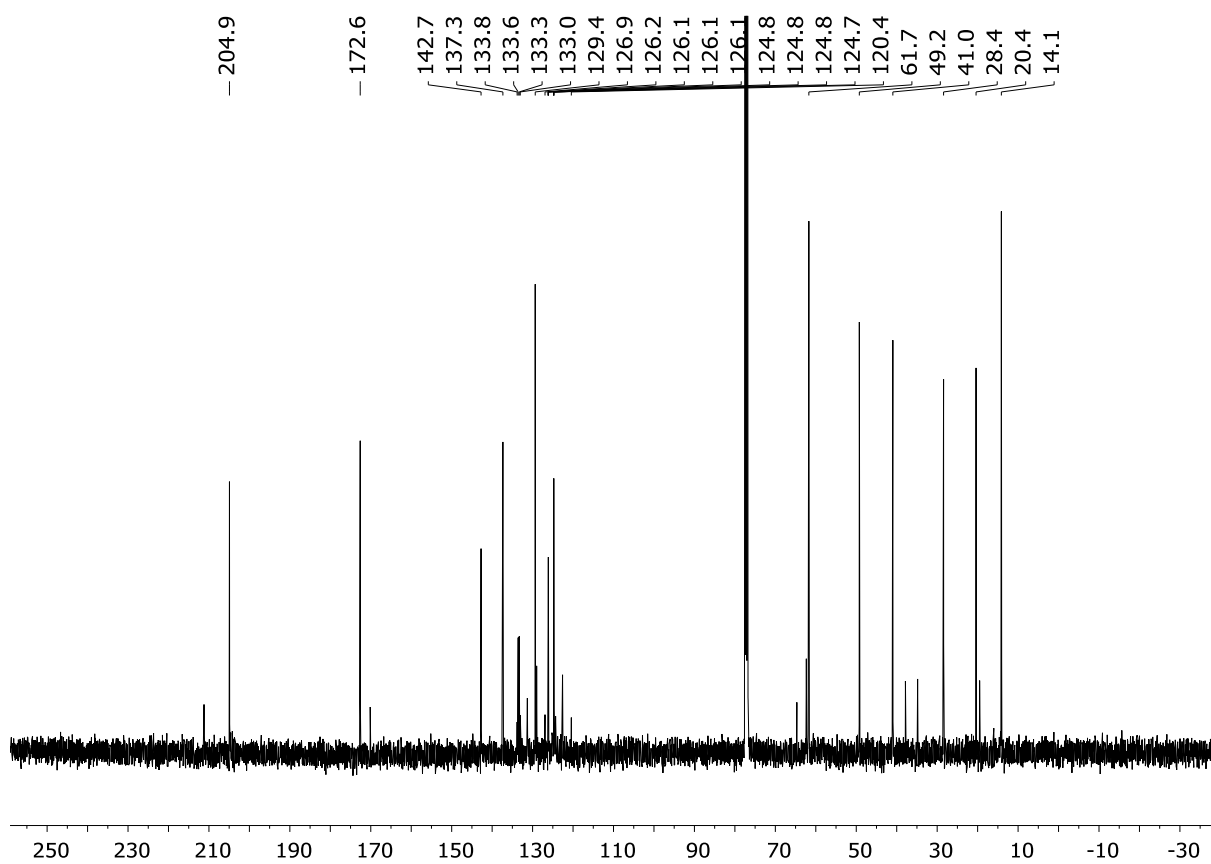

<sup>13</sup>C{<sup>1</sup>H} NMR (125 MHz, CDCl<sub>3</sub>) of compound **2I**.

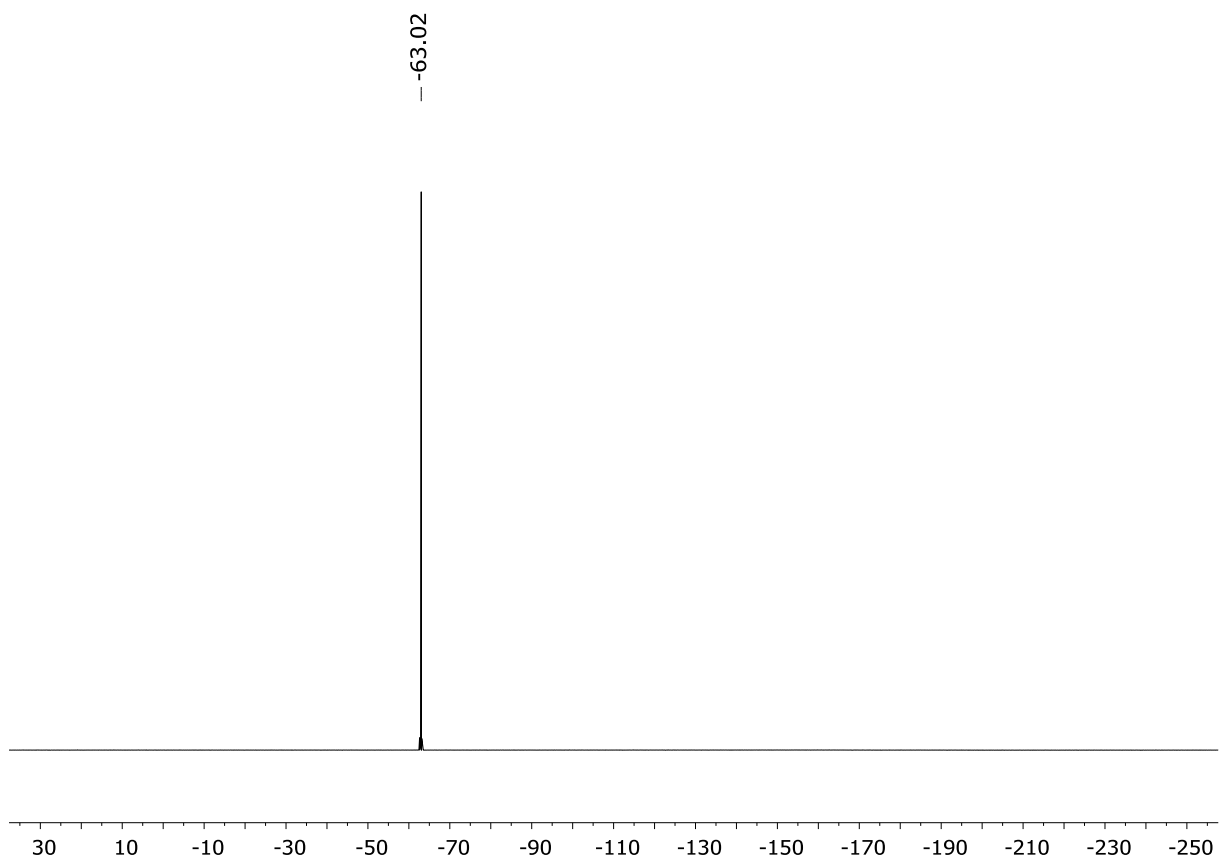

$^{19}\text{F}\{^1\text{H}\}$  NMR (470 MHz,  $\text{CDCl}_3$ ) of compound **2I**.



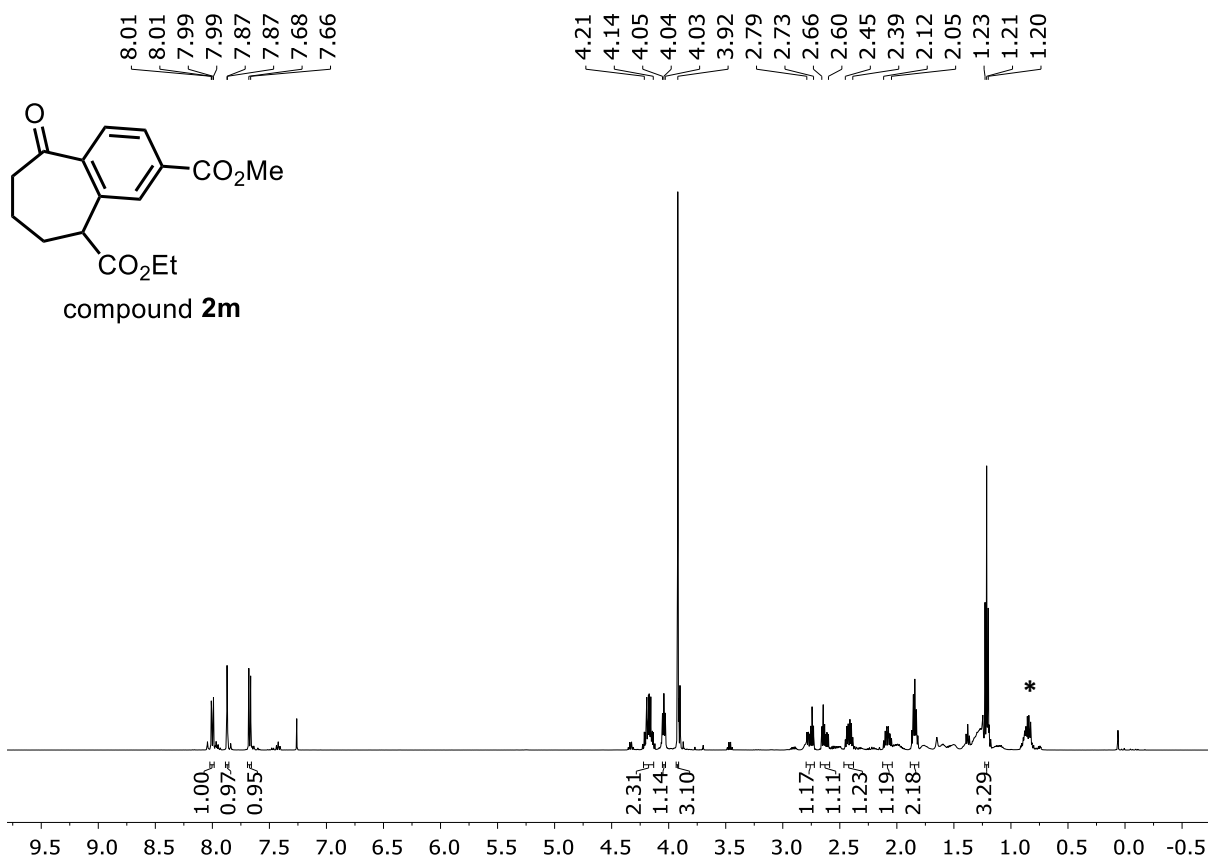

$^1\text{H}$  NMR (500 MHz,  $\text{CDCl}_3$ ) of compound **2m**. \*Impurities from the solvent.

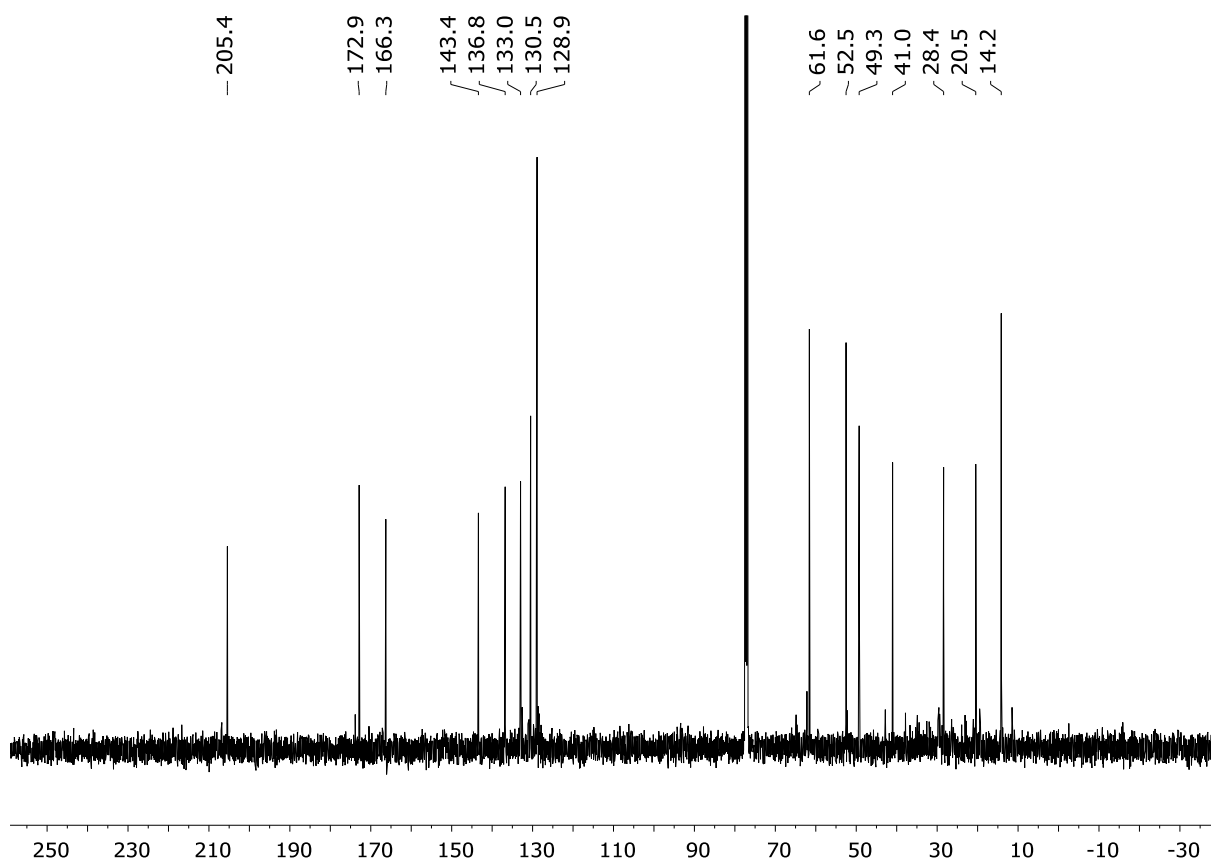

$^{13}\text{C}\{^1\text{H}\}$  NMR (125 MHz,  $\text{CDCl}_3$ ) of compound **2m**.

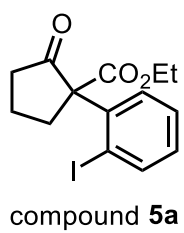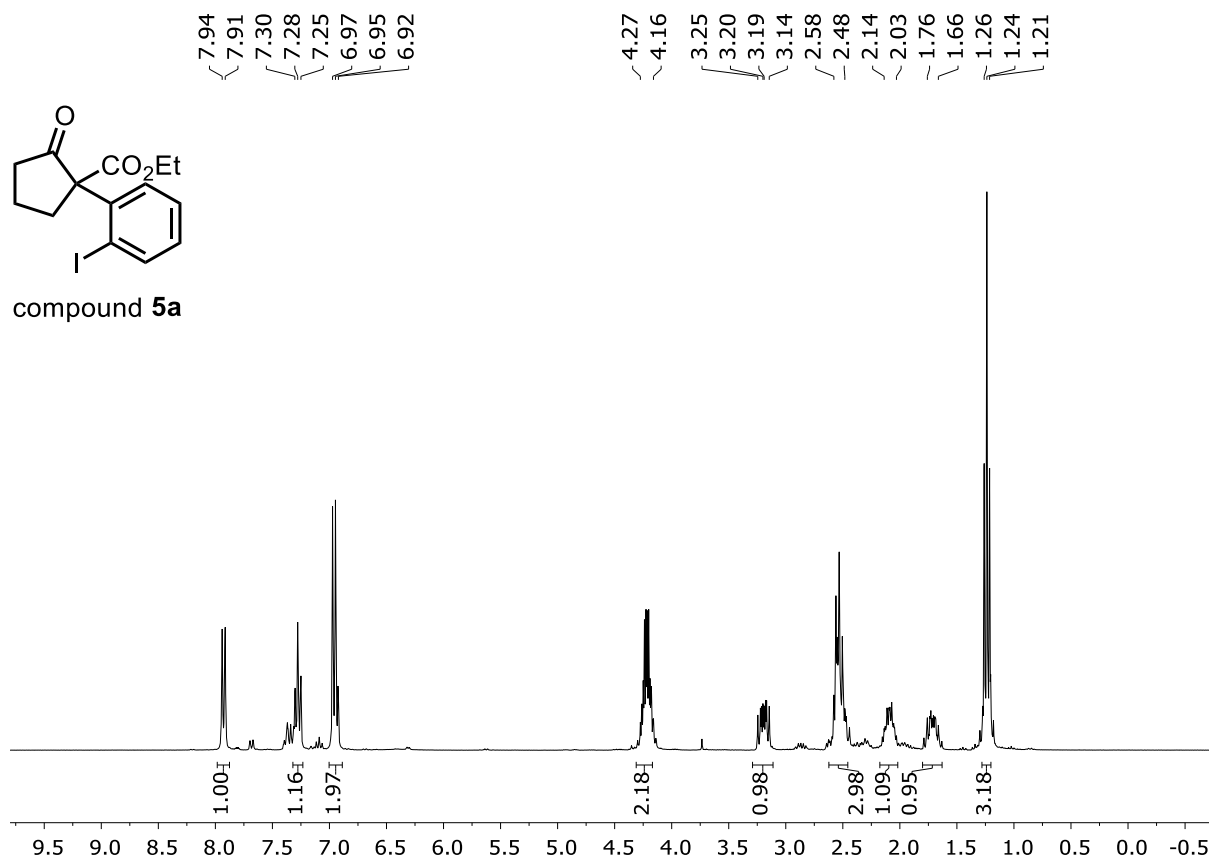

<sup>1</sup>H NMR (300 MHz, CDCl<sub>3</sub>) of compound **5a**.

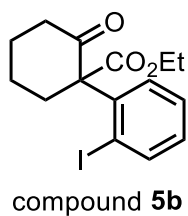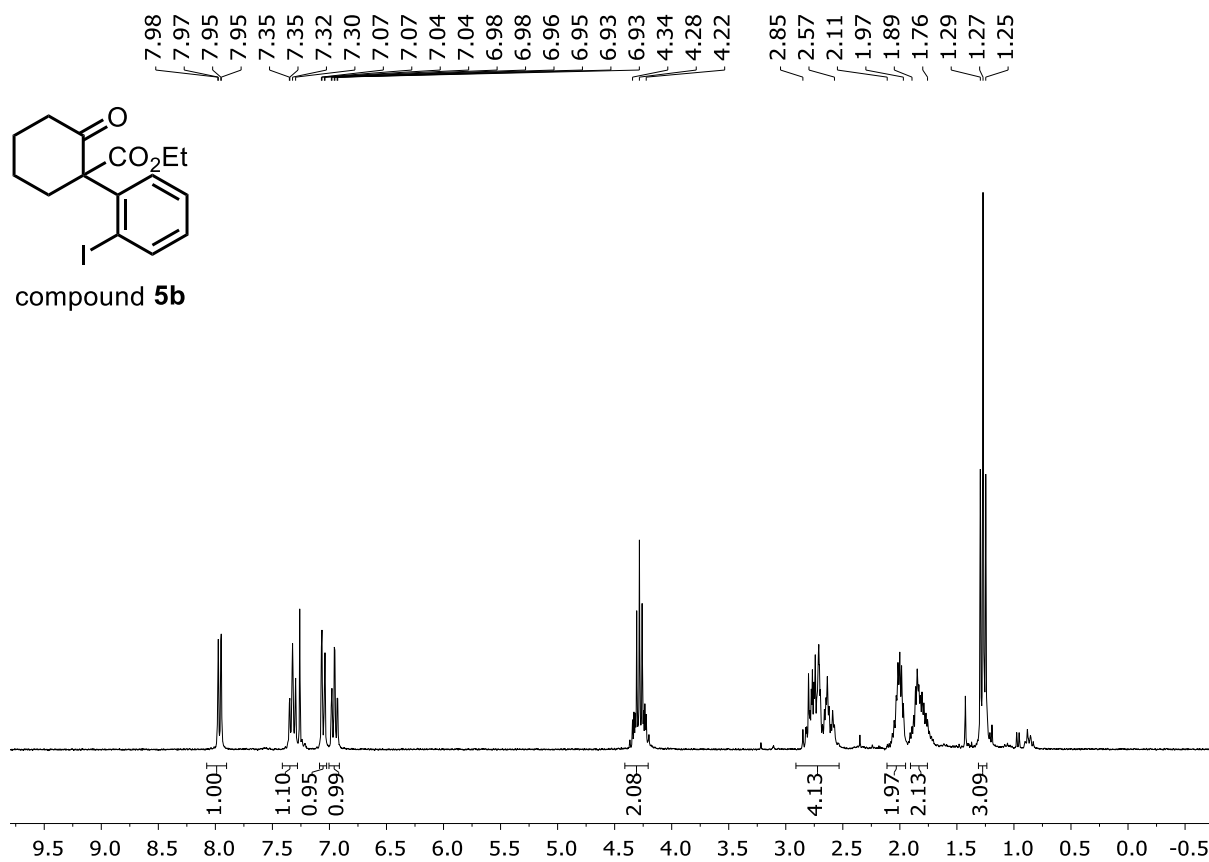

<sup>1</sup>H NMR (300 MHz, CDCl<sub>3</sub>) of compound **5b**.

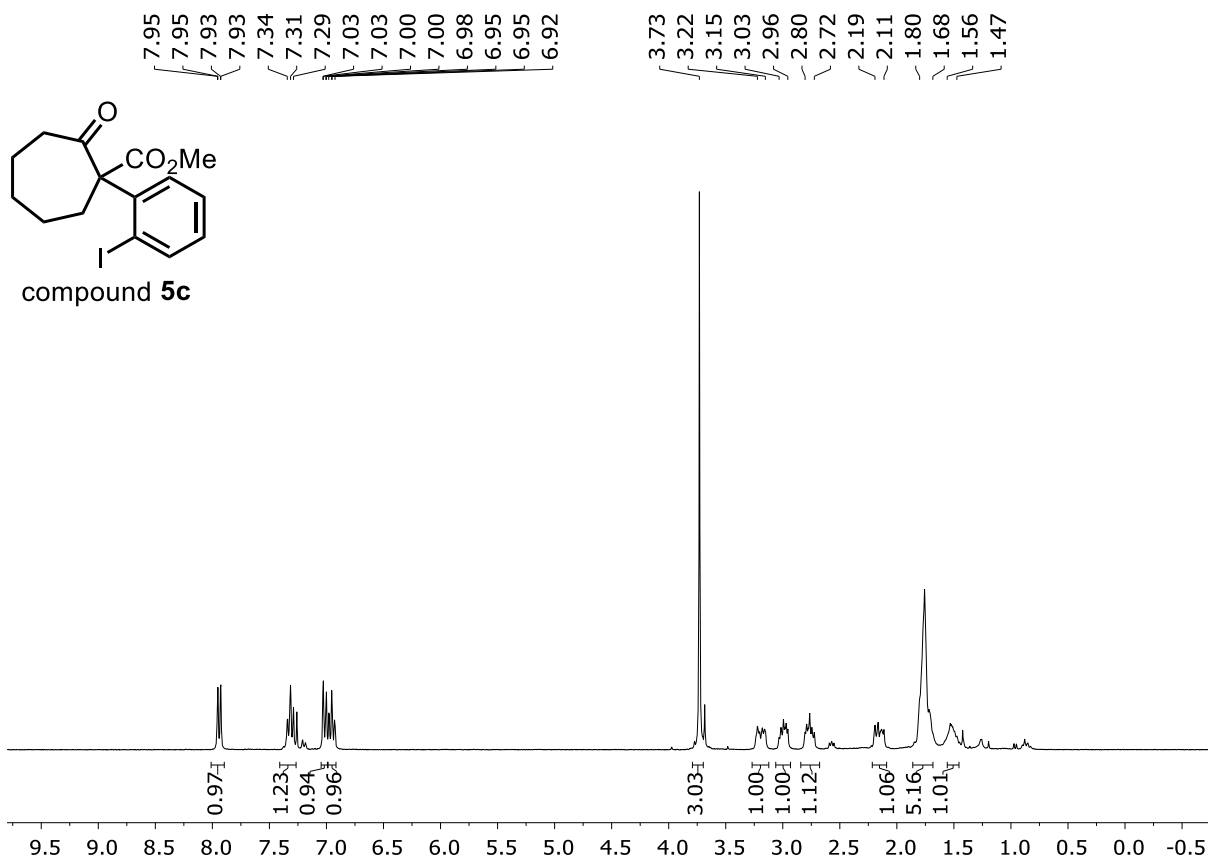

<sup>1</sup>H NMR (300 MHz, CDCl<sub>3</sub>) of compound **5c**.

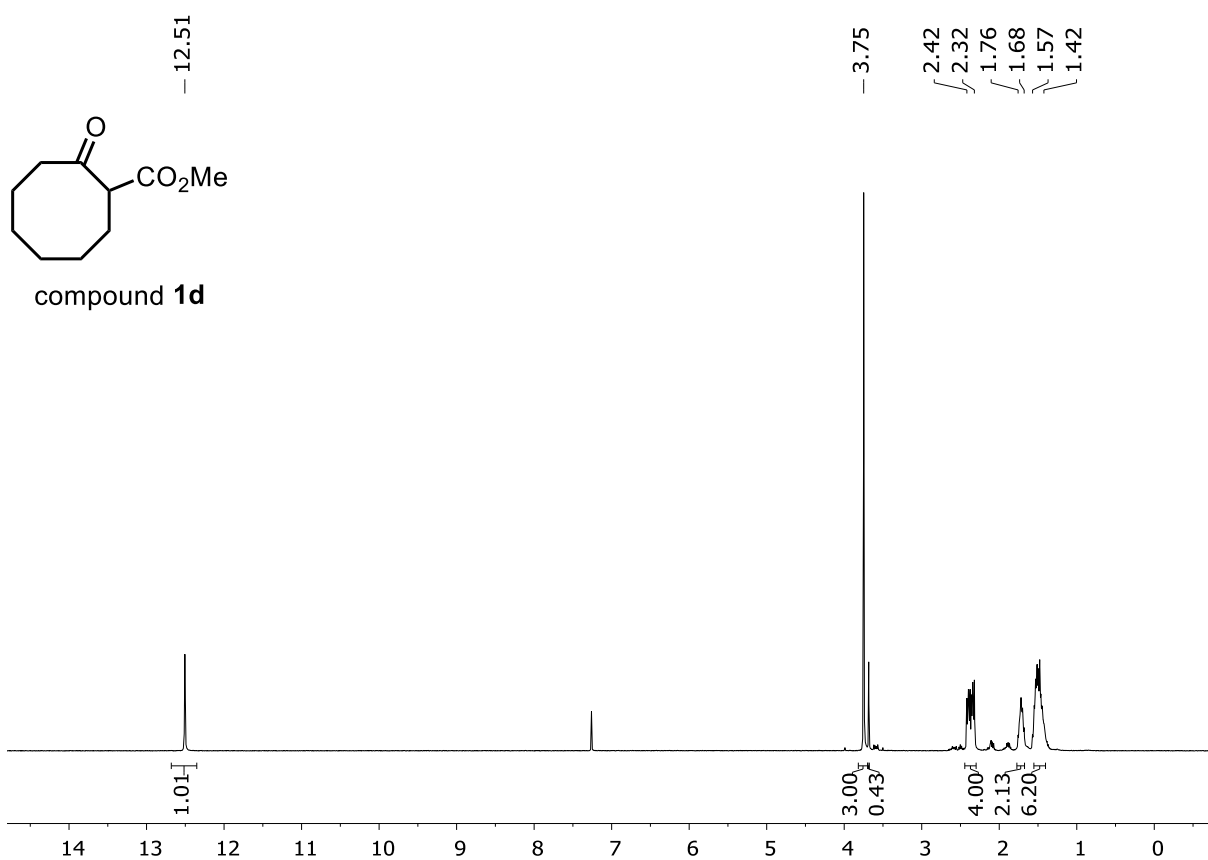

<sup>1</sup>H NMR (300 MHz, CDCl<sub>3</sub>) of compound **1d**.

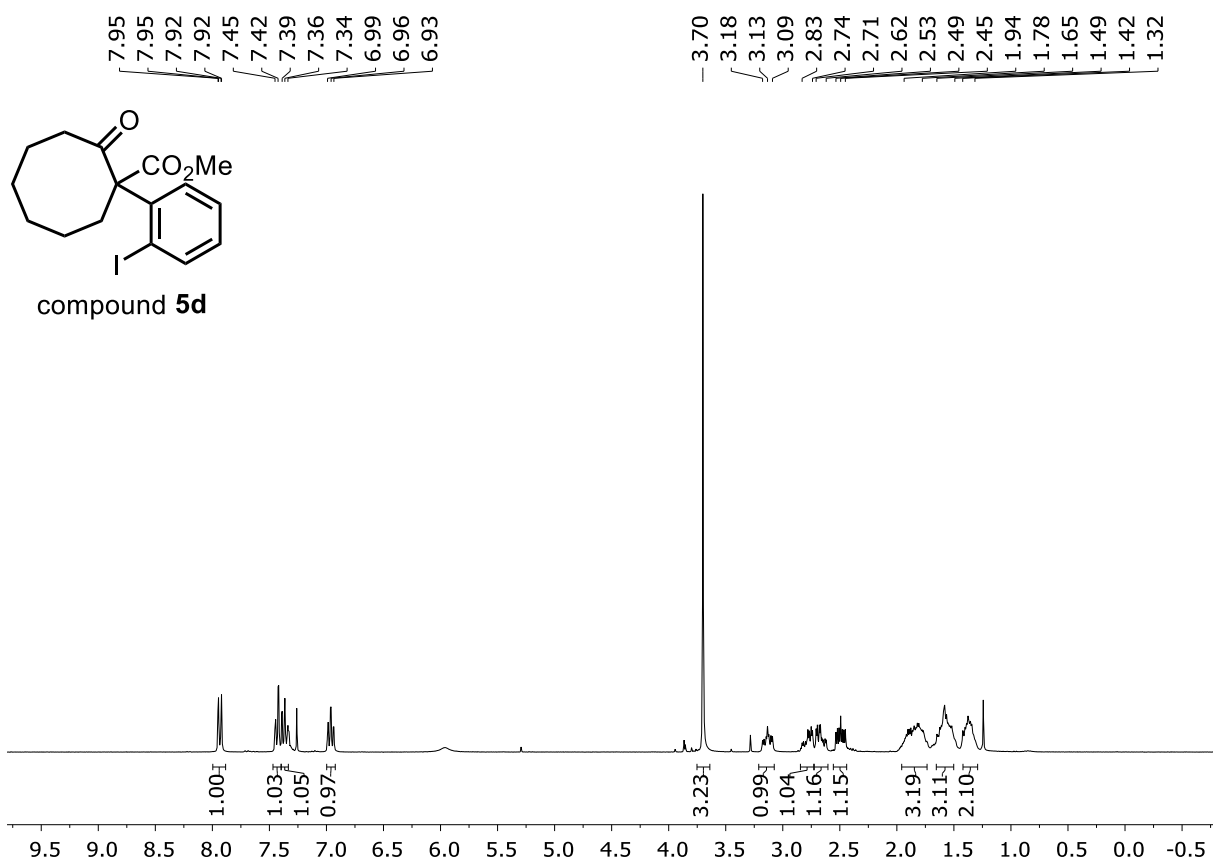

$^1\text{H}$  NMR (300 MHz,  $\text{CDCl}_3$ ) of compound **5d**.

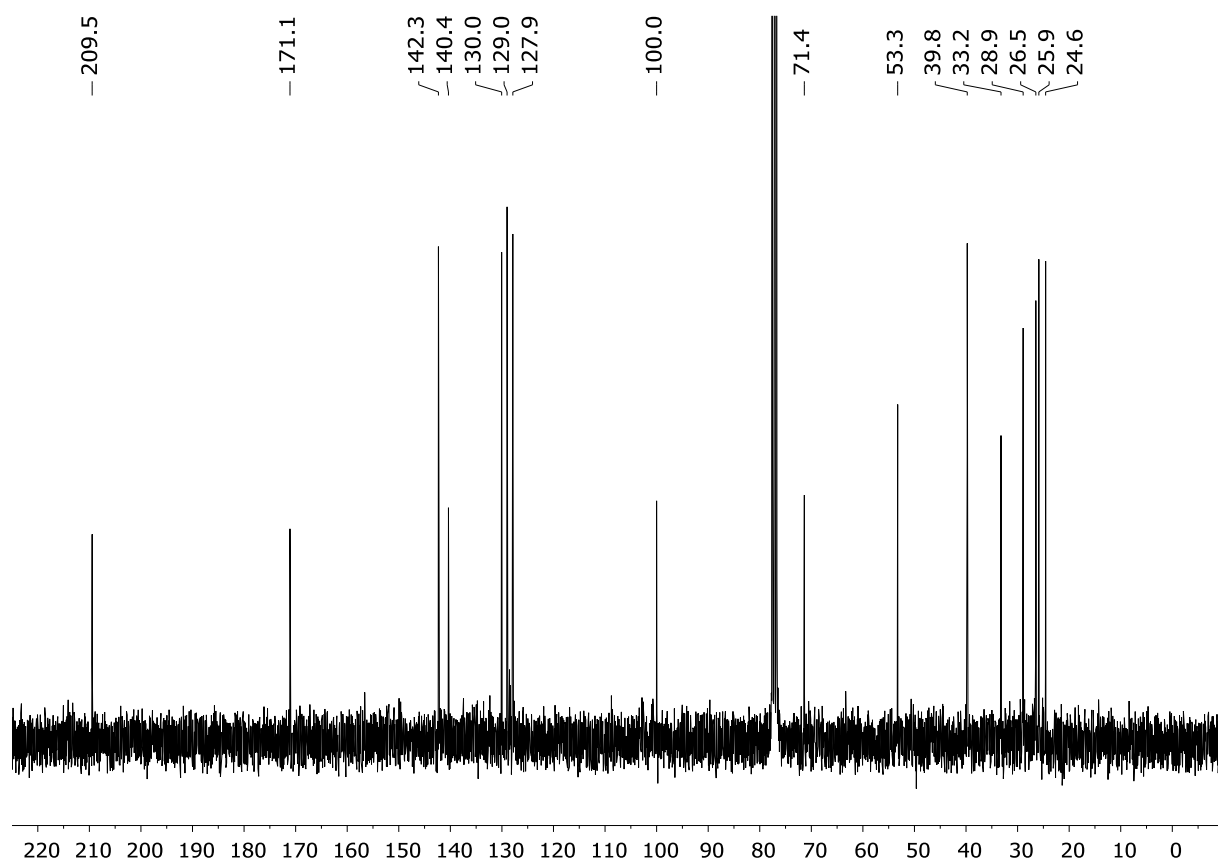

$^{13}\text{C}\{^1\text{H}\}$  NMR (75 MHz,  $\text{CDCl}_3$ ) of compound **5d**.

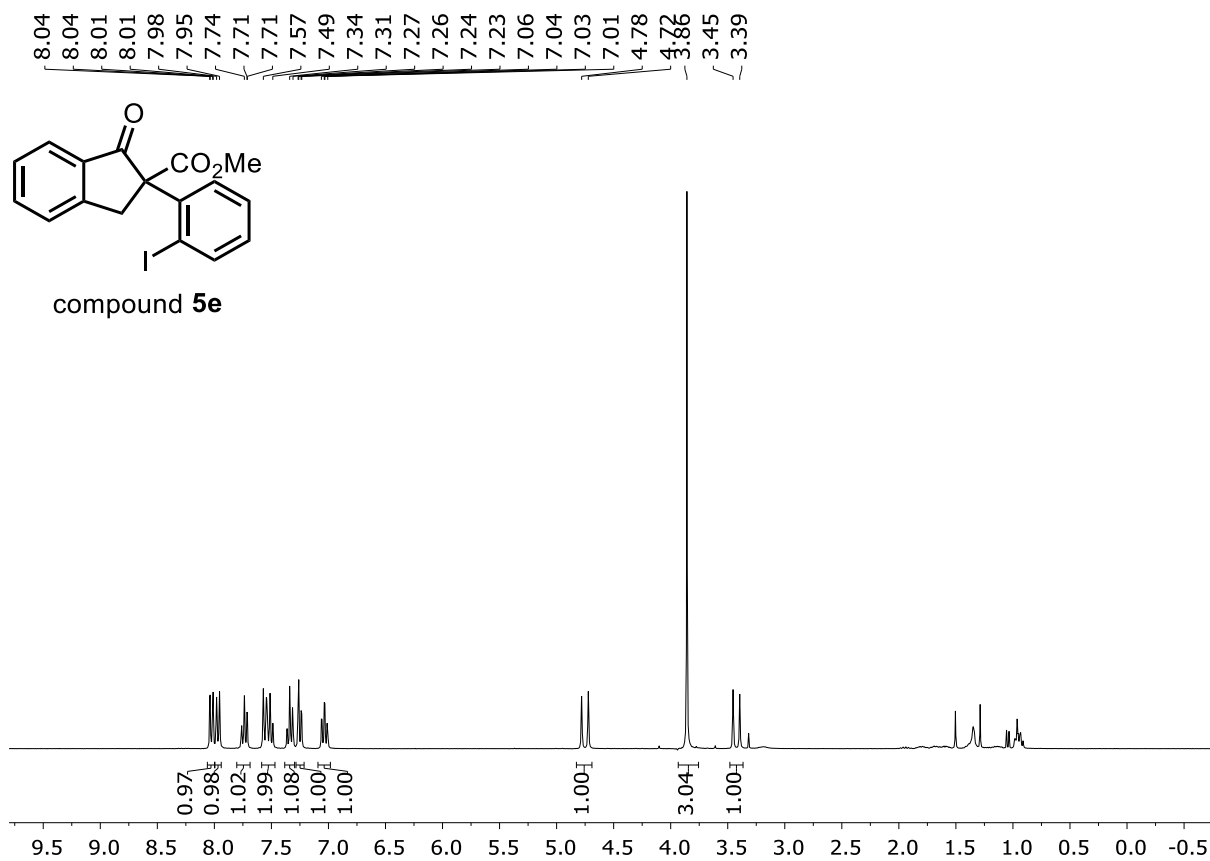

<sup>1</sup>H NMR (300 MHz, CDCl<sub>3</sub>) of compound **5e**.

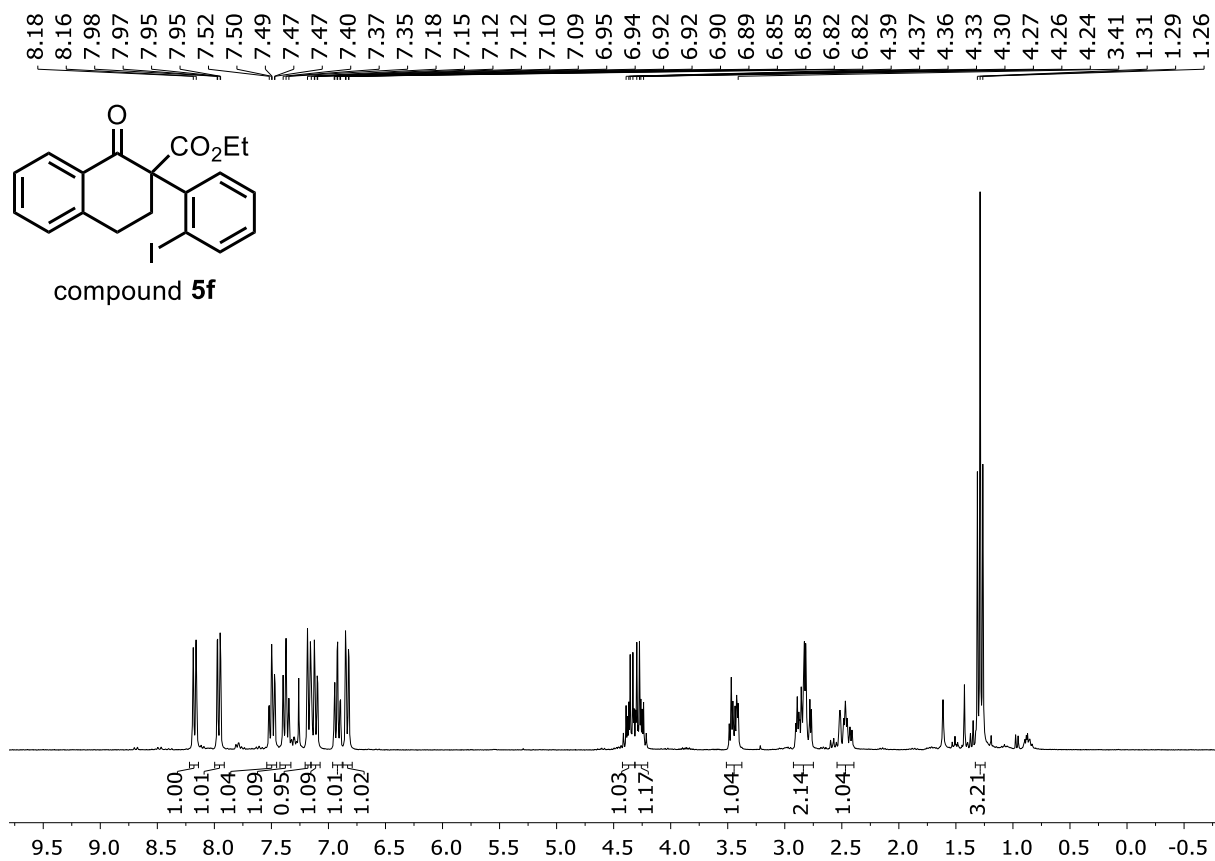

$^1\text{H}$  NMR (300 MHz,  $\text{CDCl}_3$ ) of compound **5f**.

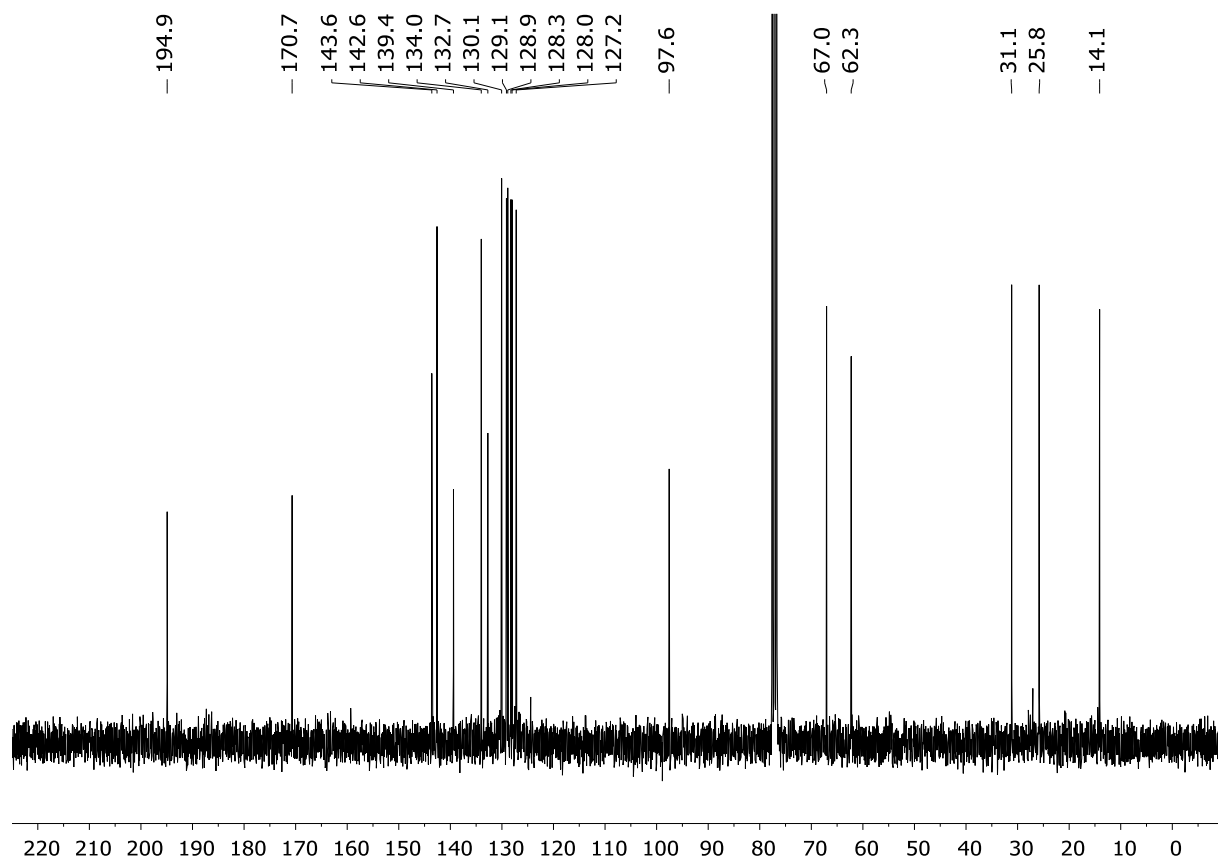

$^{13}\text{C}\{^1\text{H}\}$  NMR (75 MHz,  $\text{CDCl}_3$ ) compound **5f**.

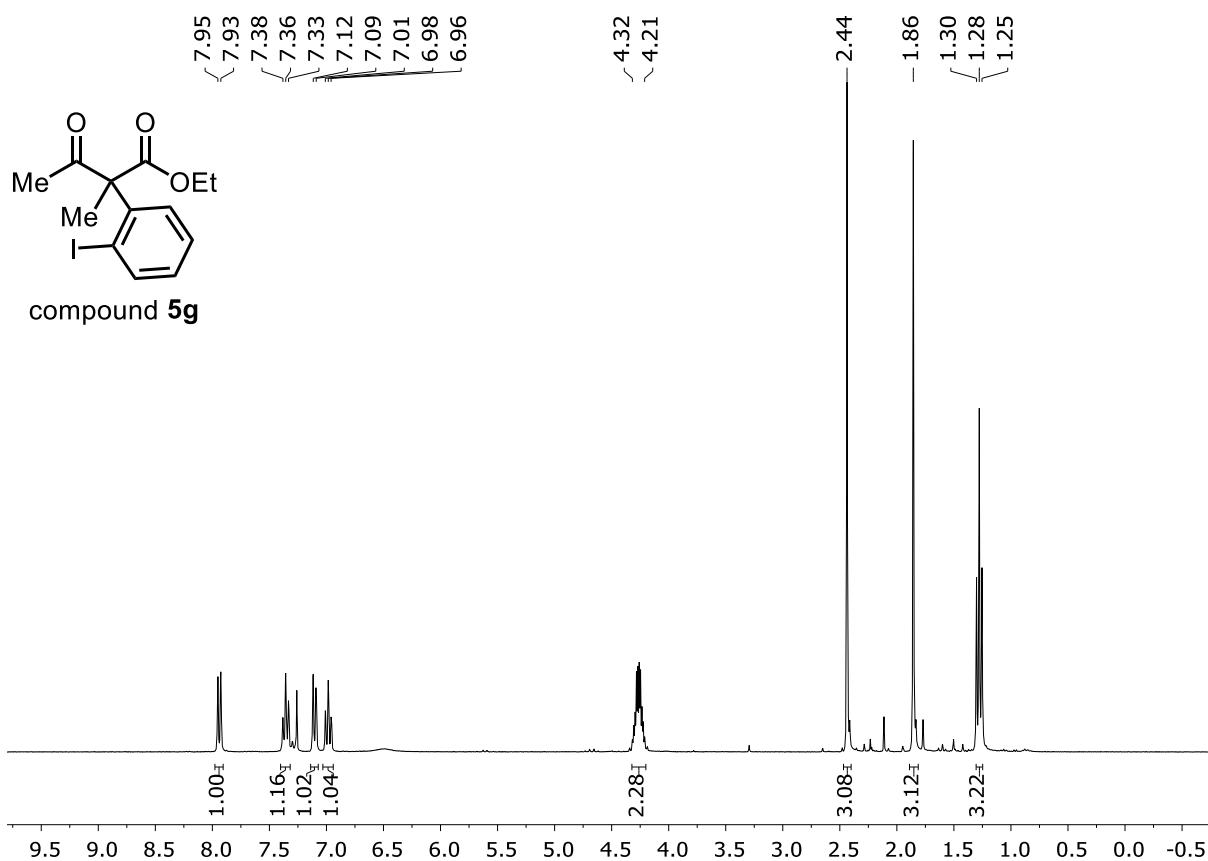

$^1\text{H}$  NMR (300 MHz,  $\text{CDCl}_3$ ) of compound **5g**.

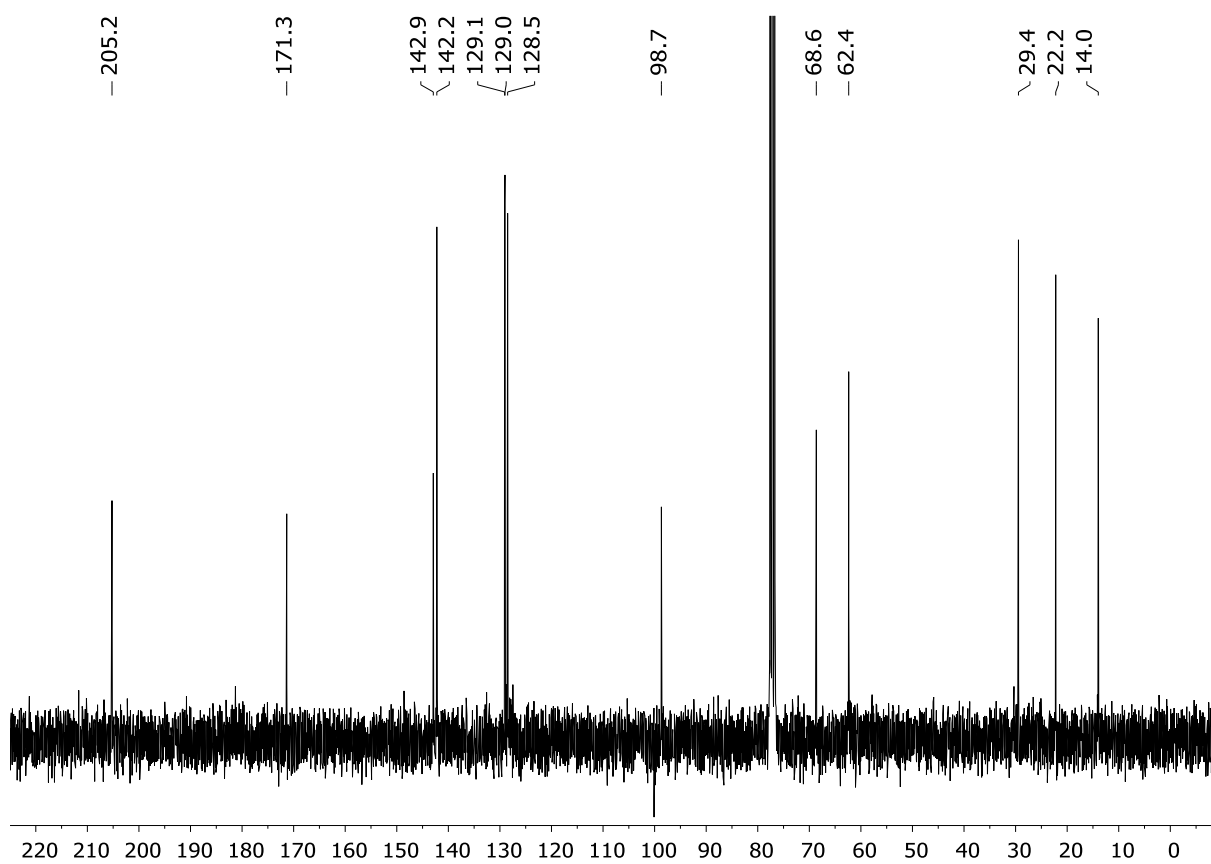

$^{13}\text{C}\{^1\text{H}\}$  NMR (75 MHz,  $\text{CDCl}_3$ ) compound **5g**.

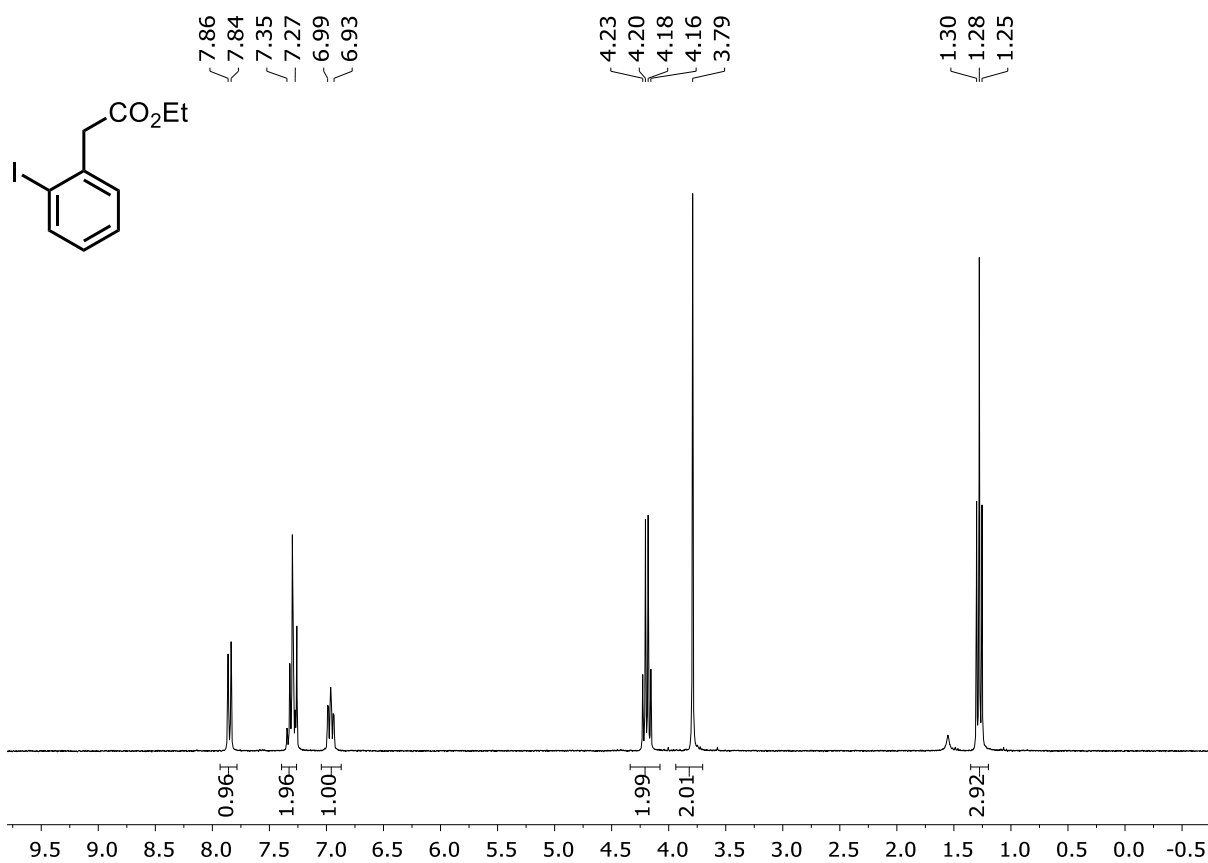



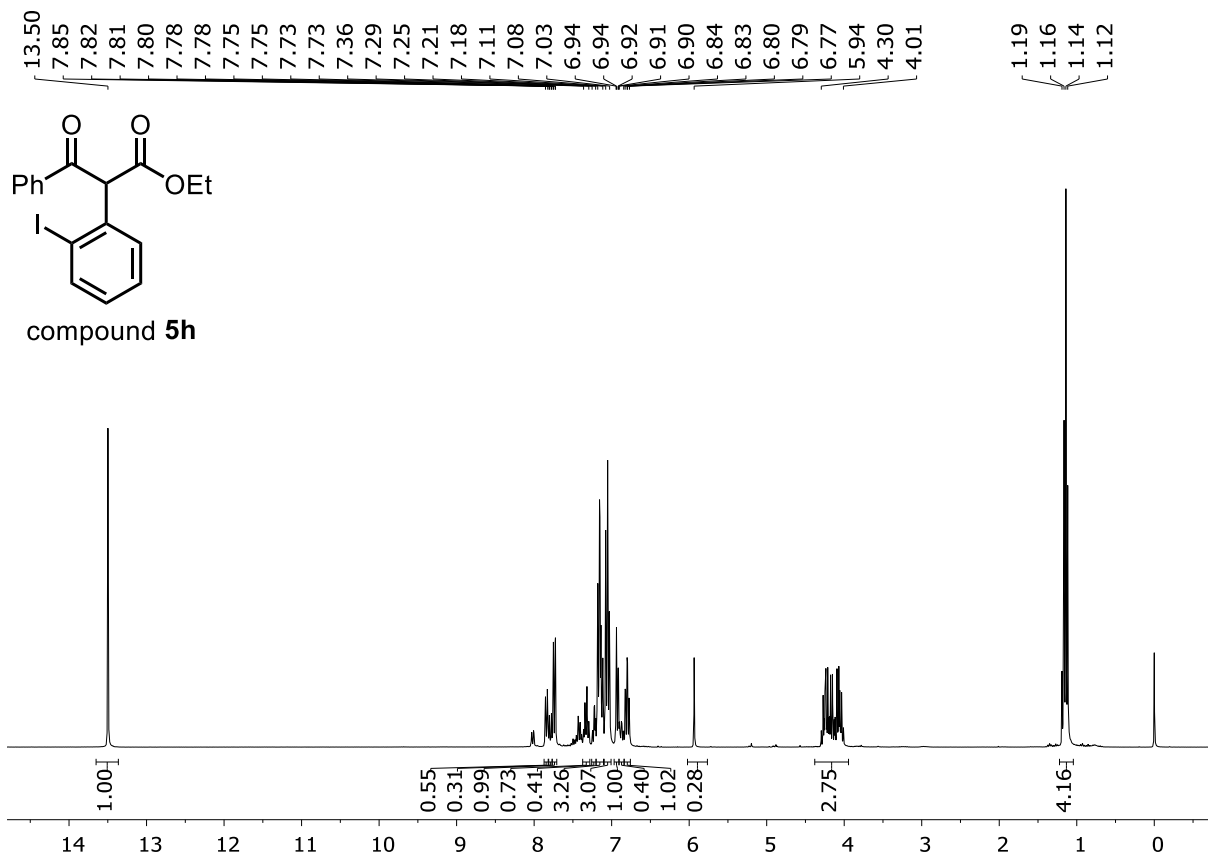

$^1\text{H}$  NMR (300 MHz,  $\text{CDCl}_3$ ) of compound **5h**.

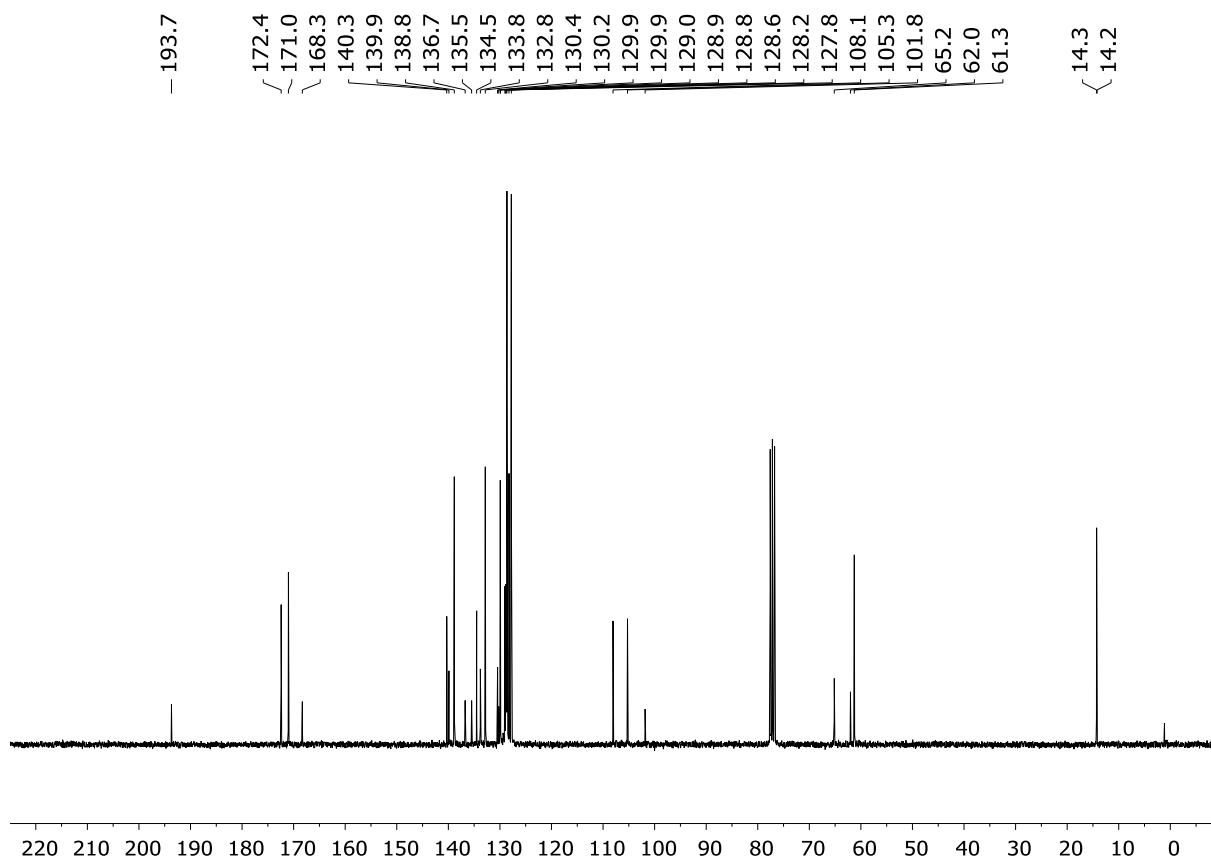

$^{13}\text{C}\{^1\text{H}\}$  NMR (75 MHz,  $\text{CDCl}_3$ ) of compound **5h**.

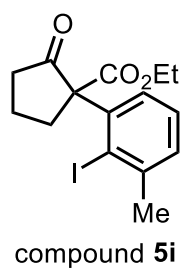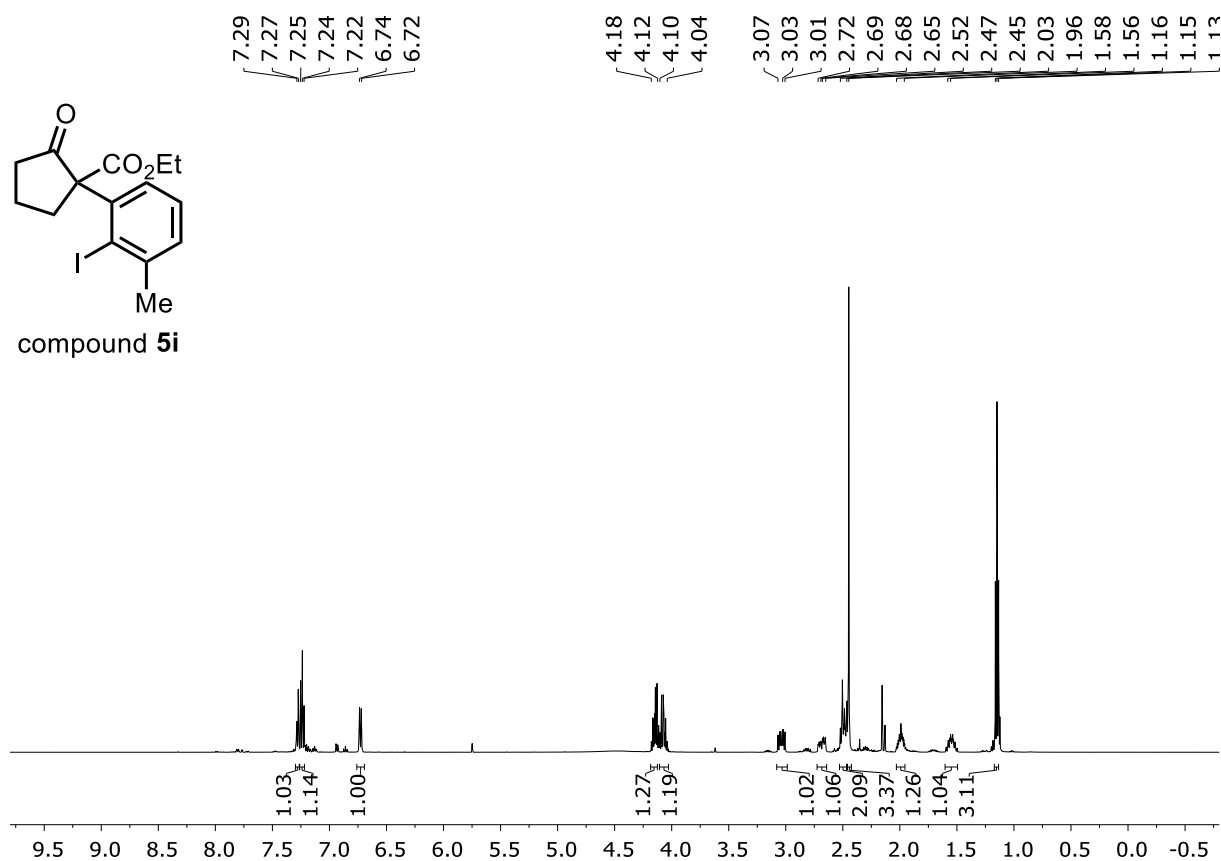

<sup>1</sup>H NMR (500 MHz, DMSO-*d*<sub>6</sub>) of compound **5i**.

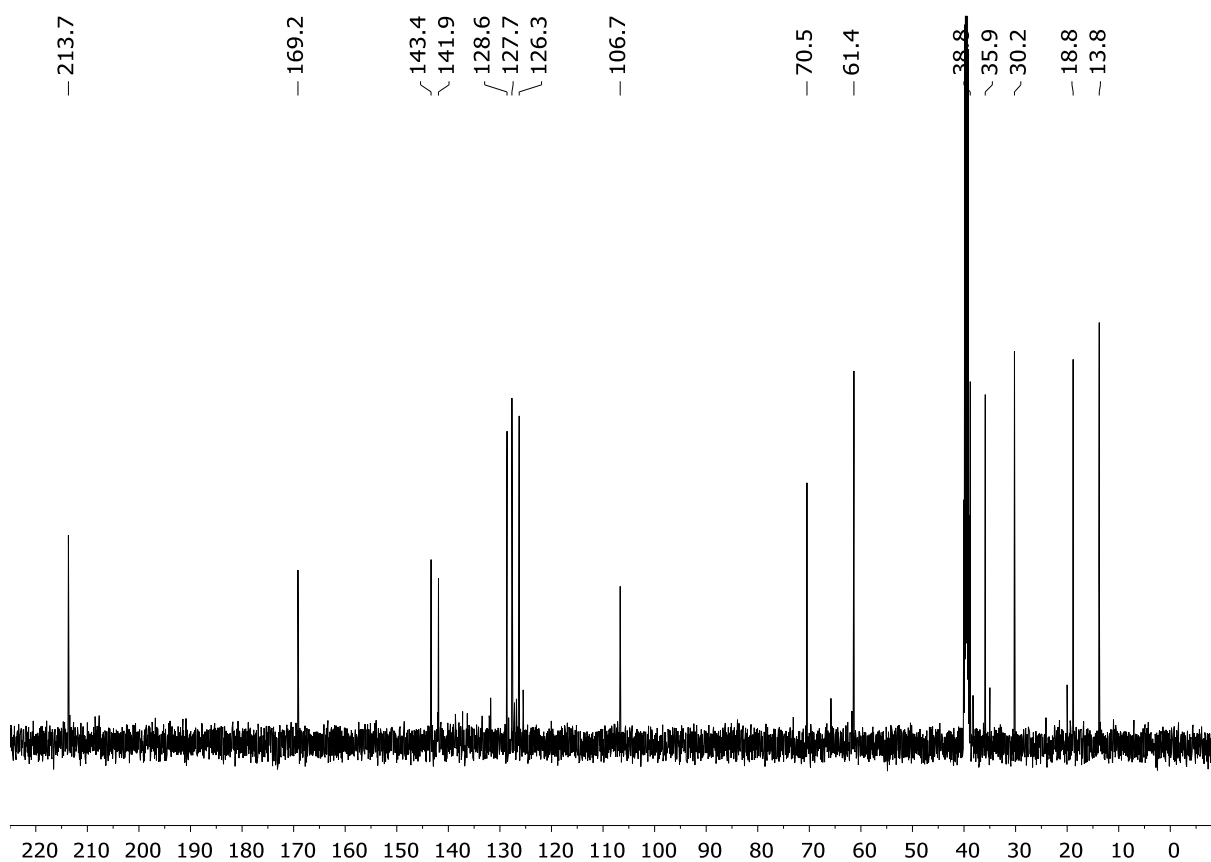

<sup>13</sup>C{<sup>1</sup>H} NMR (125 MHz, DMSO-*d*<sub>6</sub>) of compound **5i**.

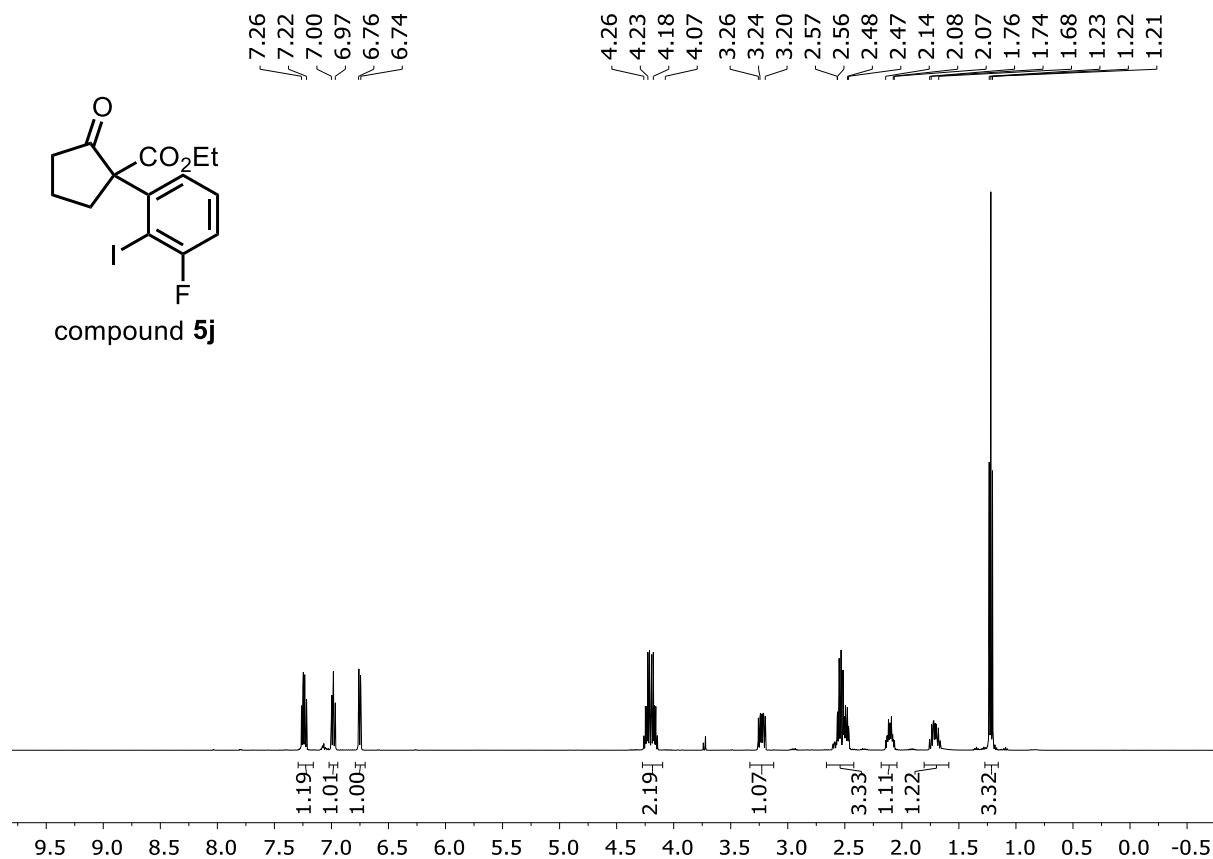

$^1\text{H}$  NMR (500 MHz,  $\text{CDCl}_3$ ) of compound **5j**.

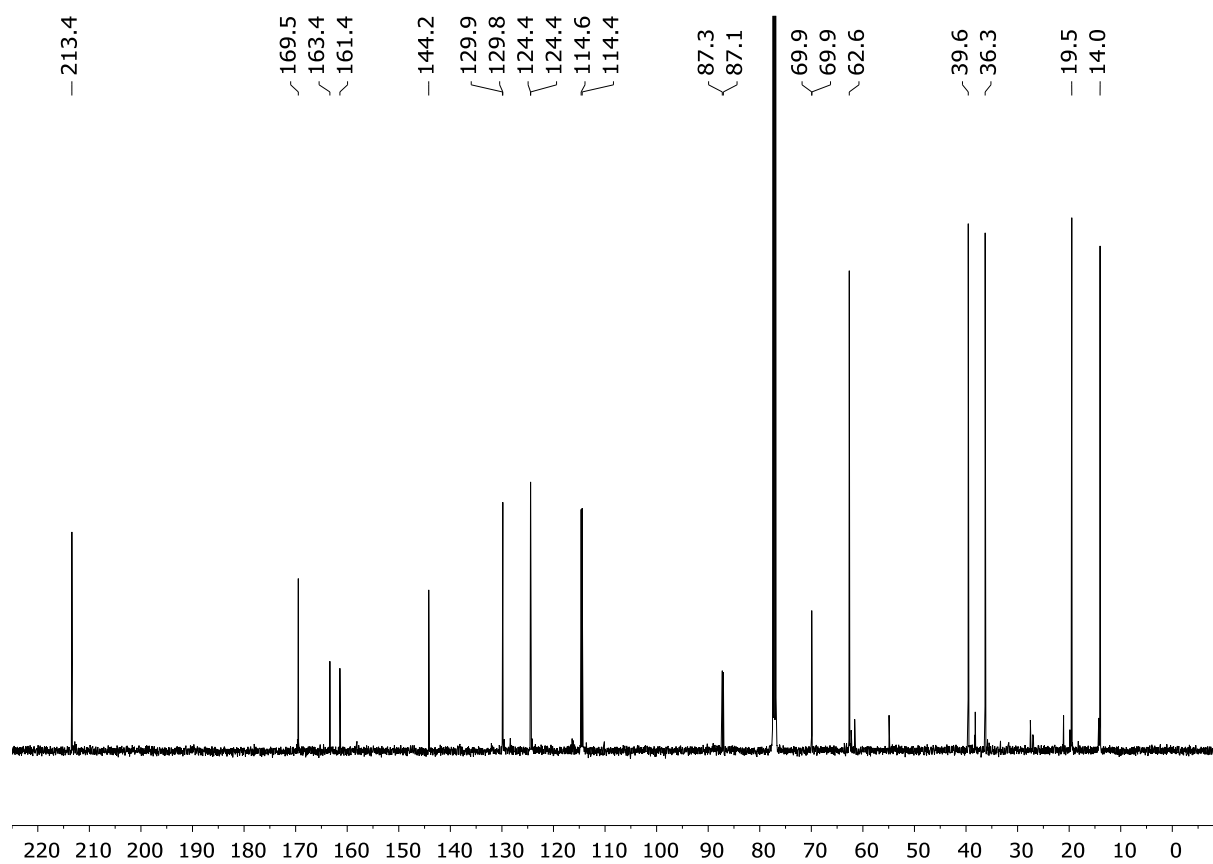

$^{13}\text{C}\{^1\text{H}\}$  NMR (125 MHz,  $\text{CDCl}_3$ ) of compound **5j**.

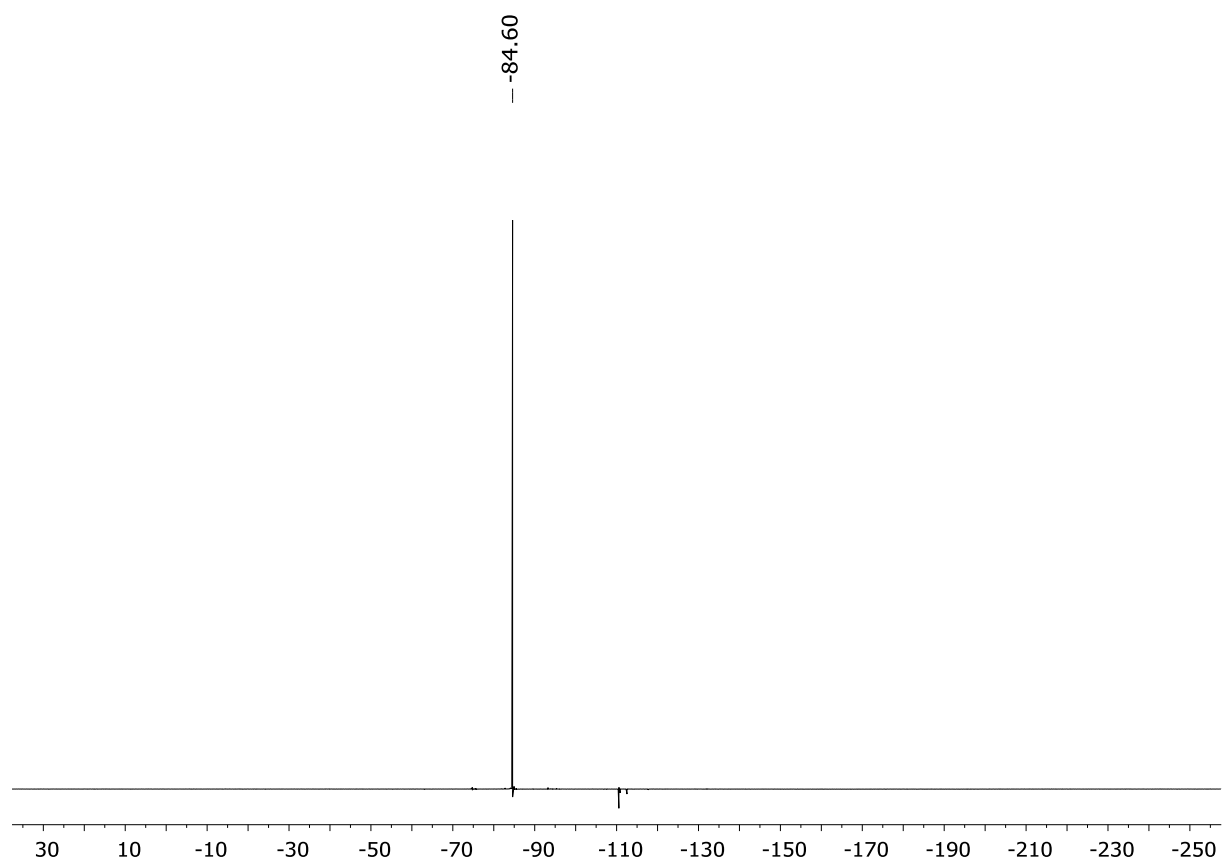

$^{19}\text{F}\{^1\text{H}\}$  NMR (470 MHz,  $\text{CDCl}_3$ ) of compound **5j**.

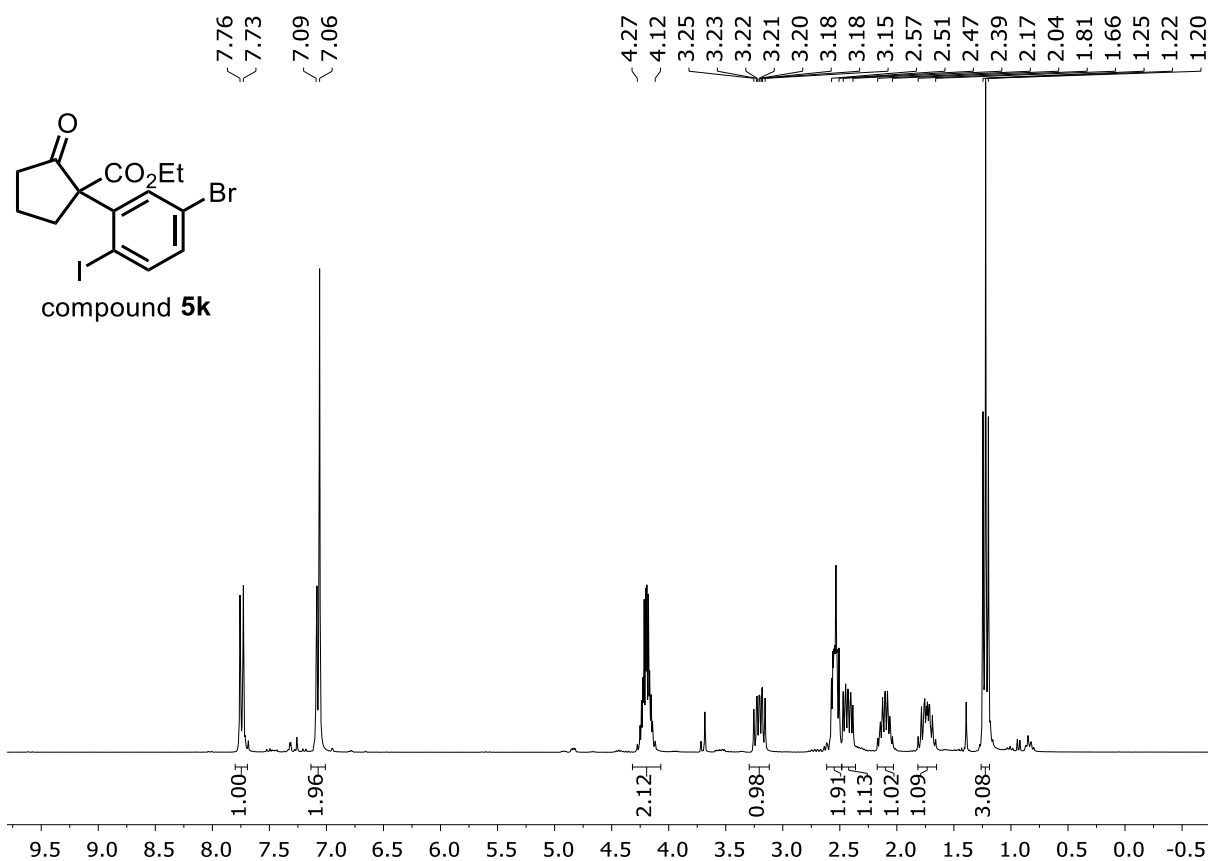

<sup>1</sup>H NMR (300 MHz, CDCl<sub>3</sub>) of compound **5k**.

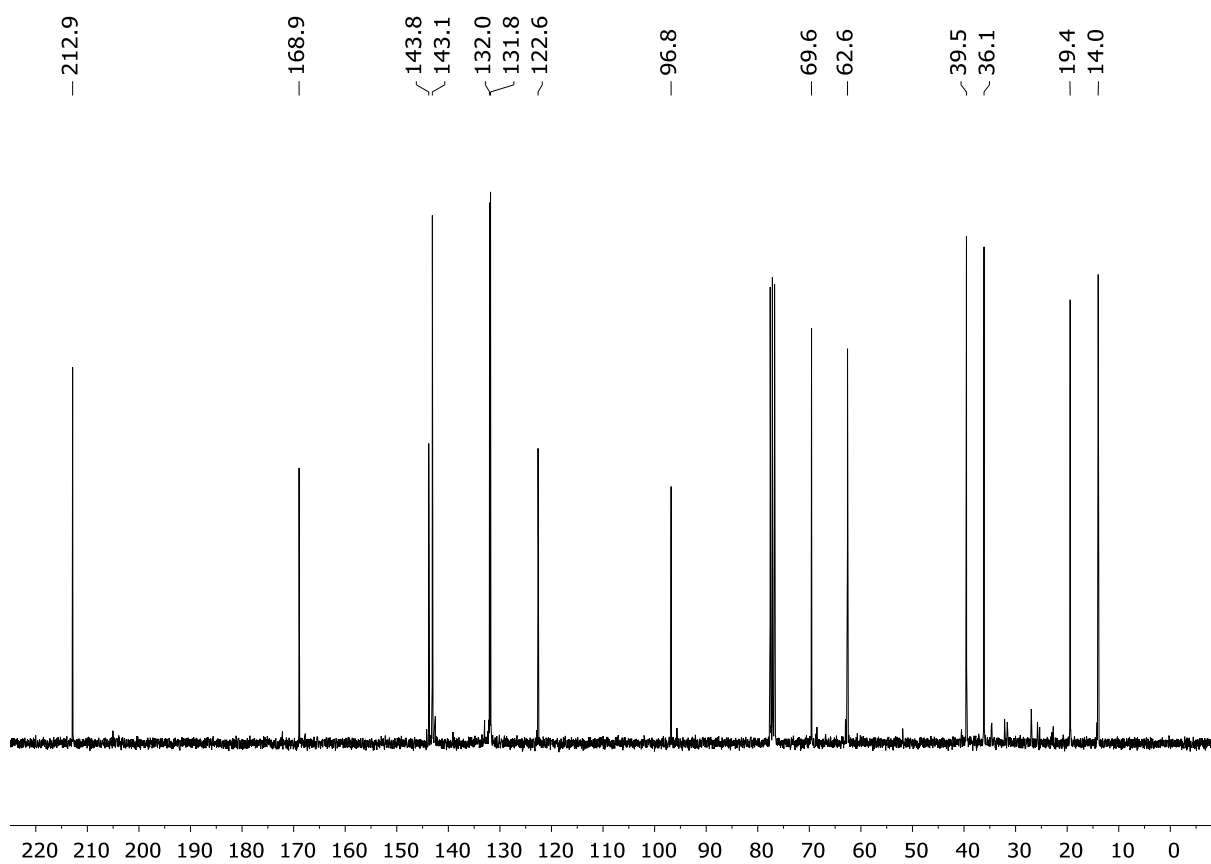

<sup>13</sup>C NMR (75 MHz, CDCl<sub>3</sub>) of compound **5k**.

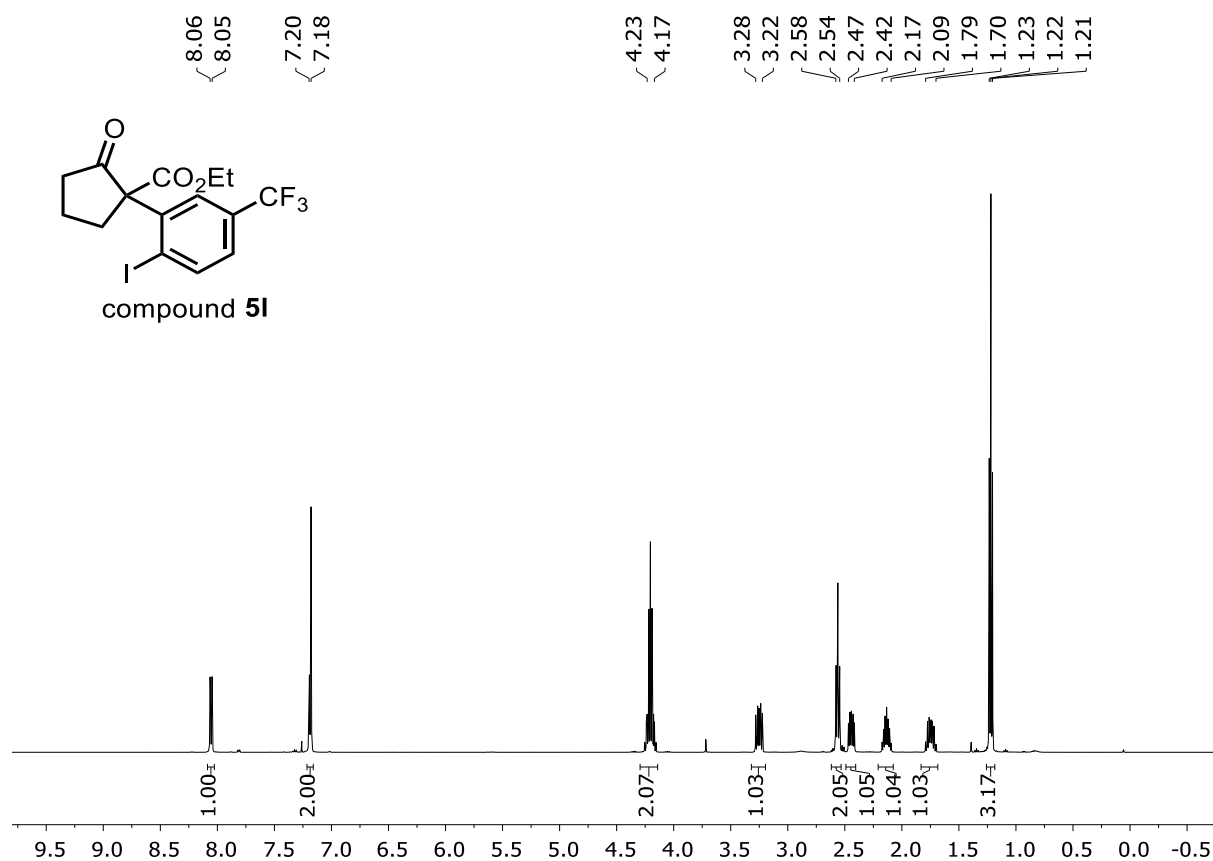

$^1\text{H}$  NMR (500 MHz,  $\text{CDCl}_3$ ) of compound **5I**.

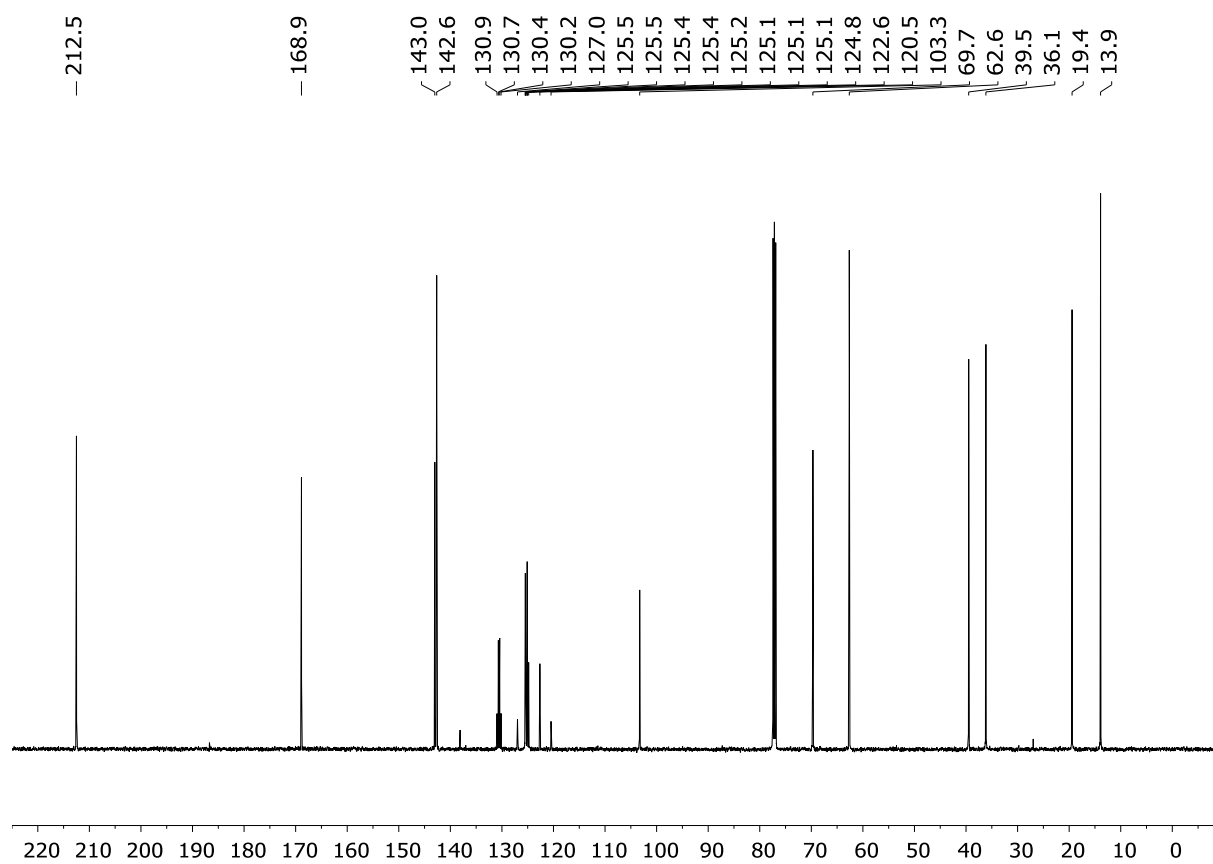

$^{13}\text{C}\{^1\text{H}\}$  NMR (125 MHz,  $\text{CDCl}_3$ ) of compound **5I**.

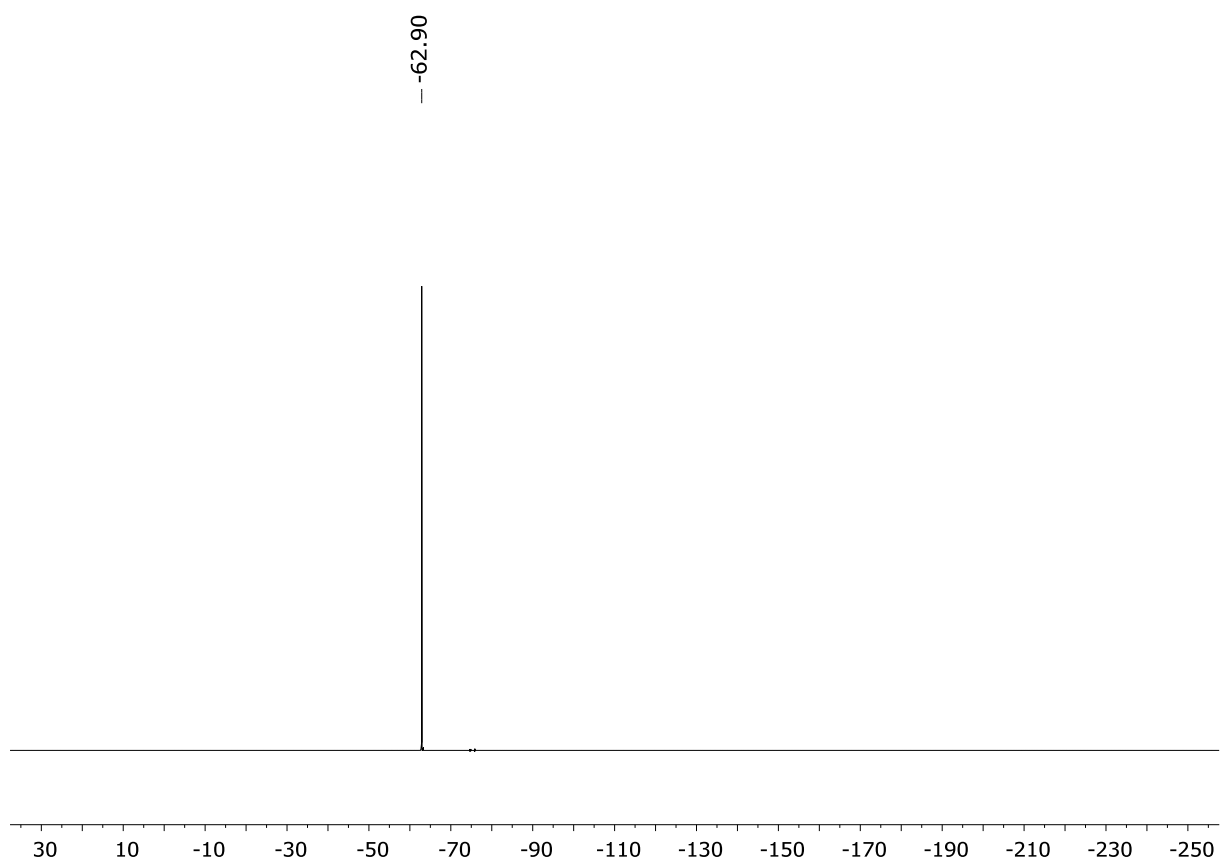

$^{19}\text{F}\{^1\text{H}\}$  NMR (470 MHz,  $\text{CDCl}_3$ ) of compound **5I**.

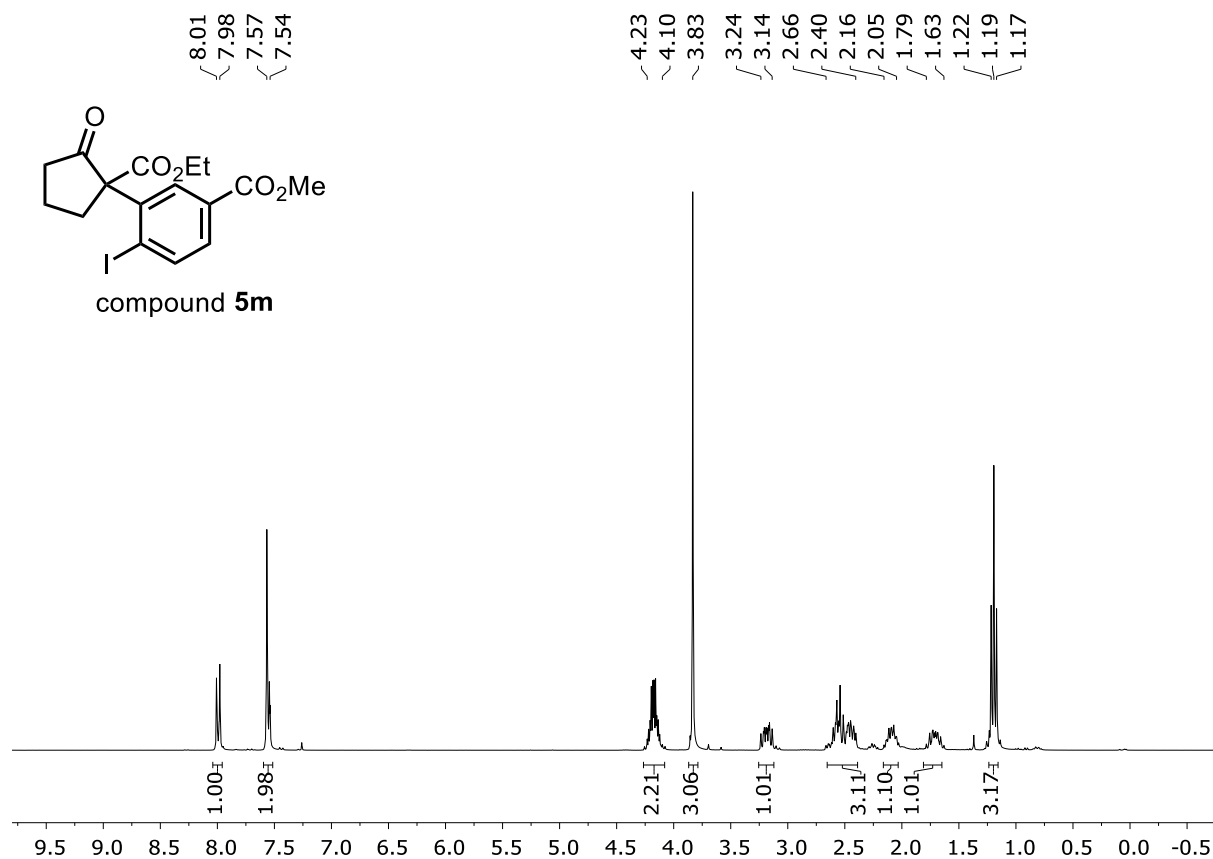

$^1\text{H}$  NMR (300 MHz,  $\text{CDCl}_3$ ) of compound **5m**.

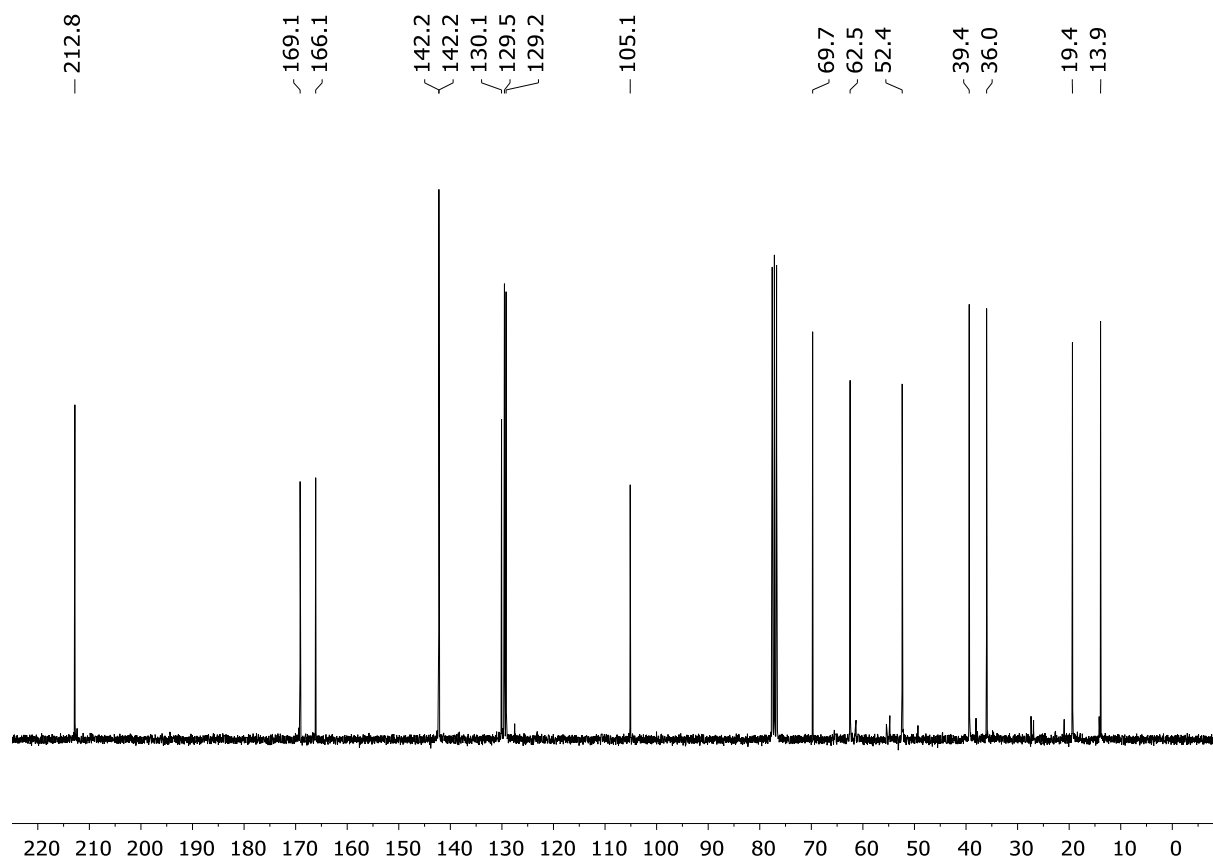

$^{13}\text{C}\{^1\text{H}\}$  NMR (75 MHz,  $\text{CDCl}_3$ ) of compound **5m**.



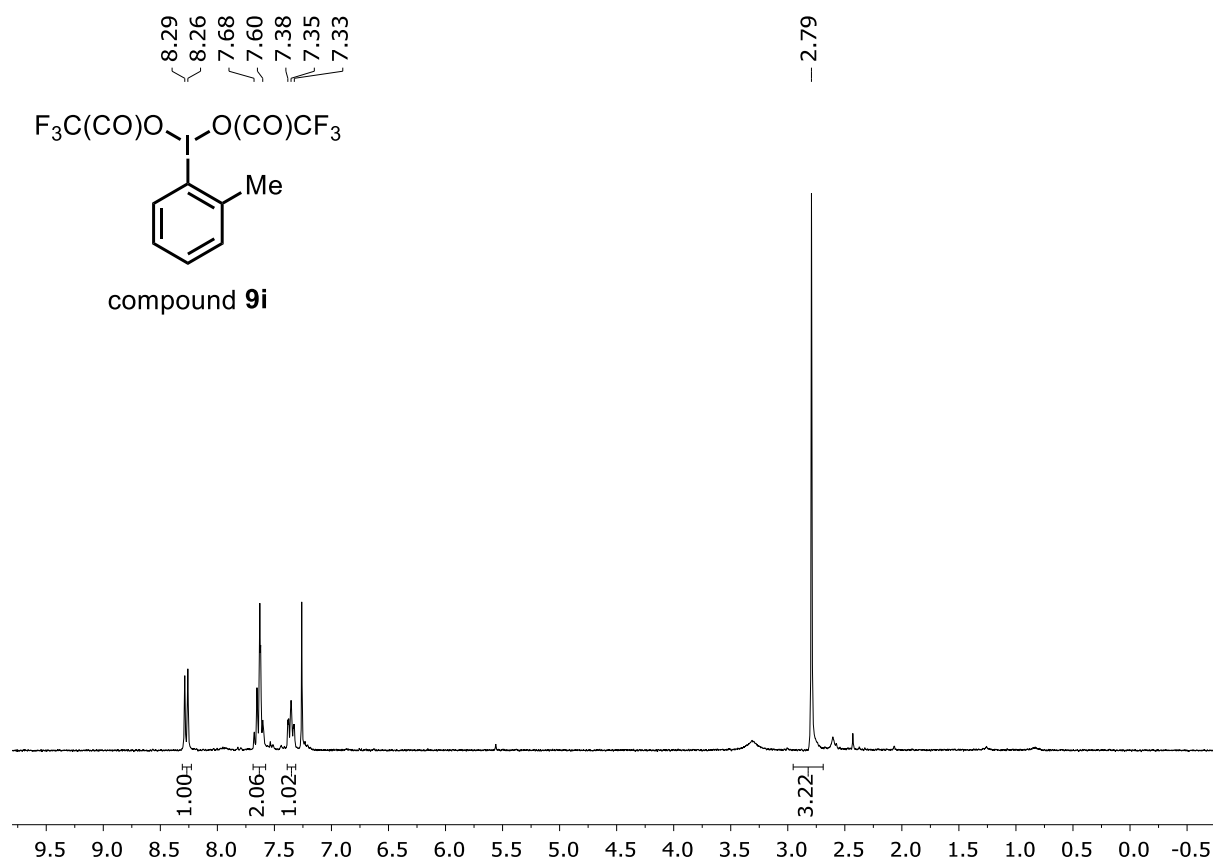

8.28  
8.28  
8.27  
8.27  
8.26  
8.26  
8.25  
8.25  
7.79  
7.77  
7.76  
7.76  
7.75  
7.75  
7.74  
7.74  
7.53  
7.52  
7.51  
7.51  
7.49  
7.49  
7.40  
7.40  
7.38  
7.37  
7.37

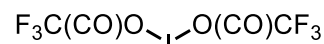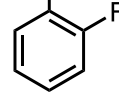

compound **9j**

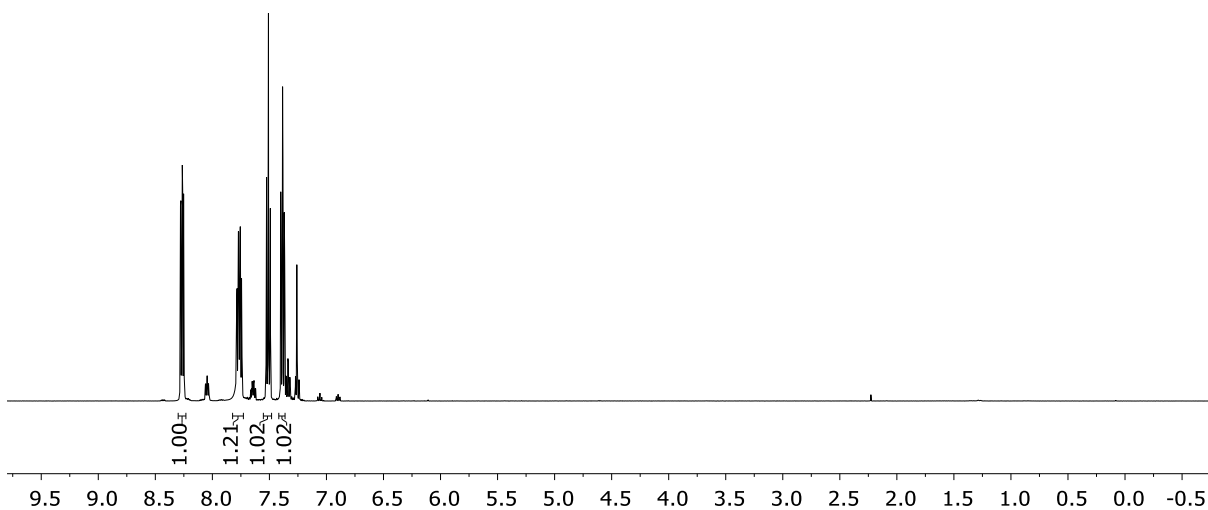

$^1\text{H}$  NMR (500 MHz,  $\text{CDCl}_3$ ) of compound **9j**.

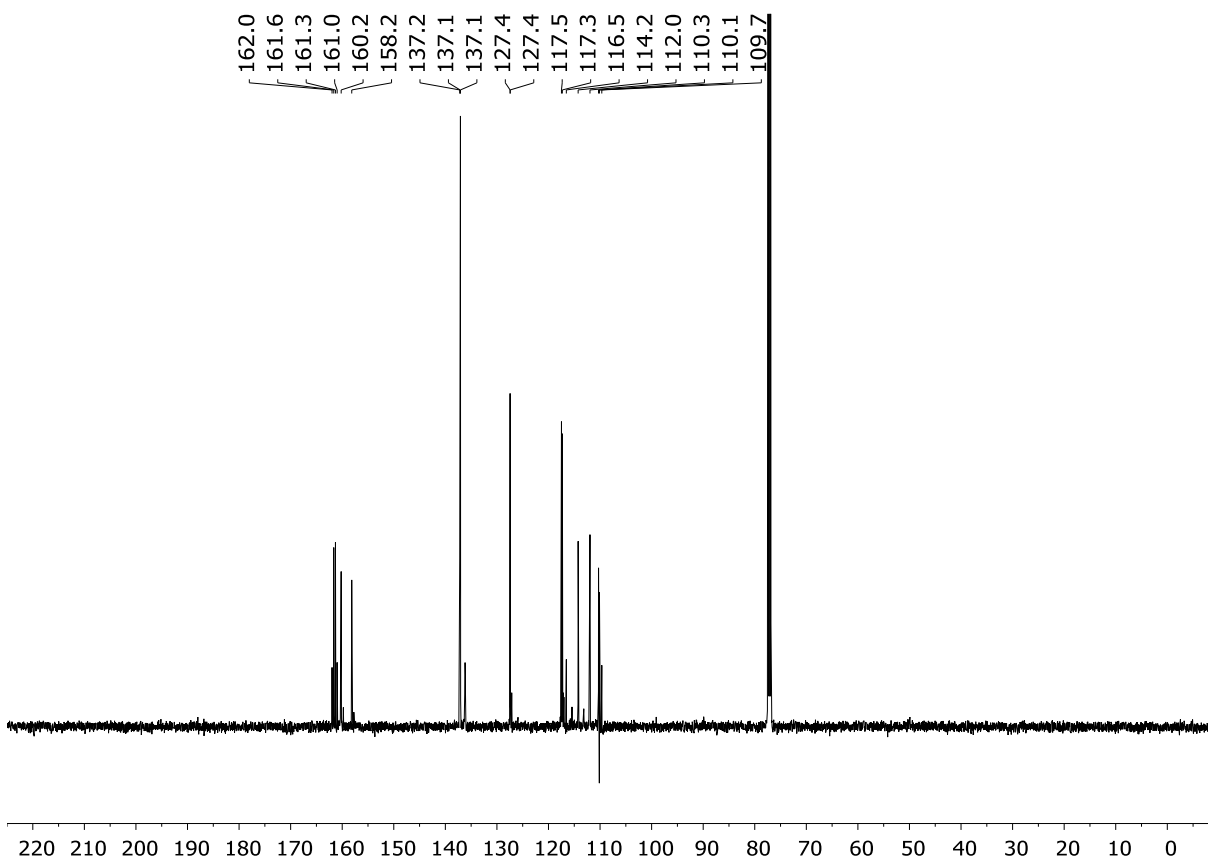

$^{13}\text{C}\{^1\text{H}\}$  NMR (125 MHz,  $\text{CDCl}_3$ ) of compound **9j**.

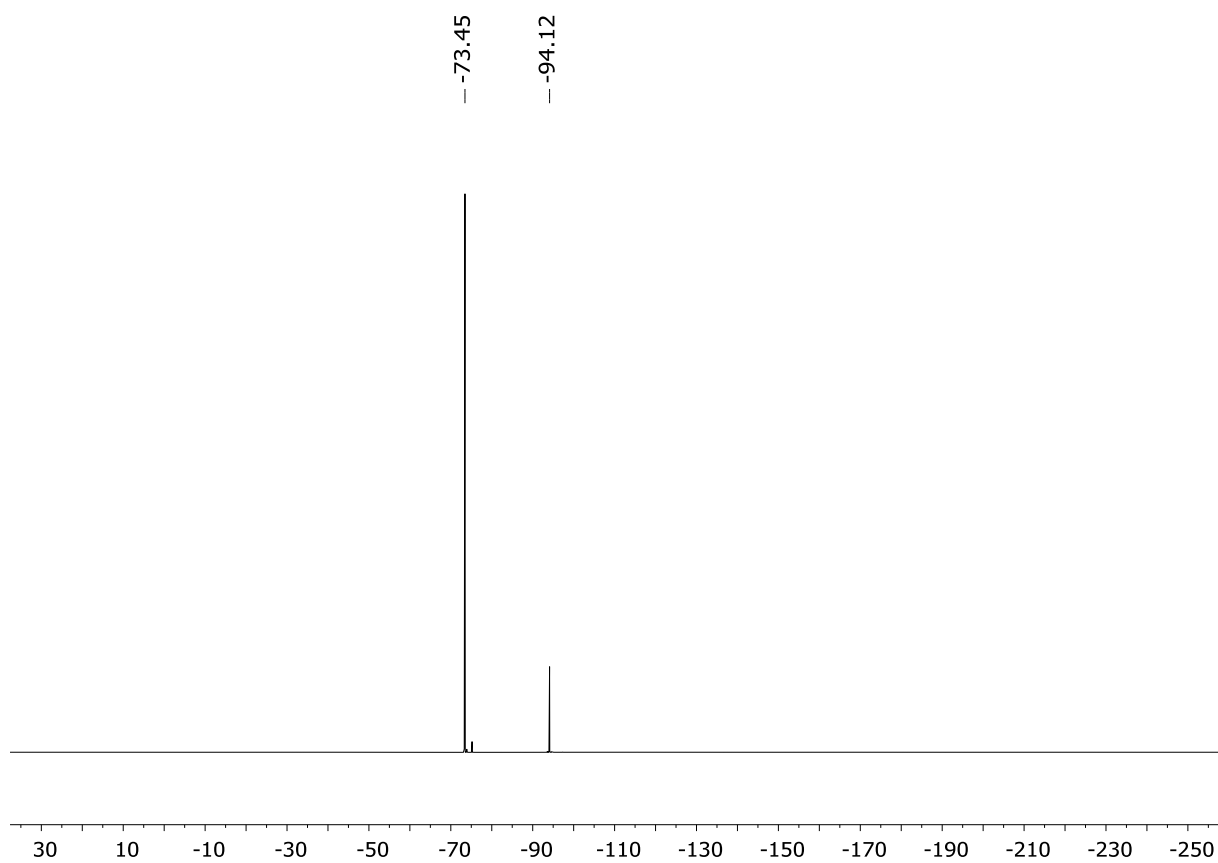

$^{19}\text{F}\{^1\text{H}\}$  NMR (470 MHz,  $\text{CDCl}_3$ ) of compound **9j**.

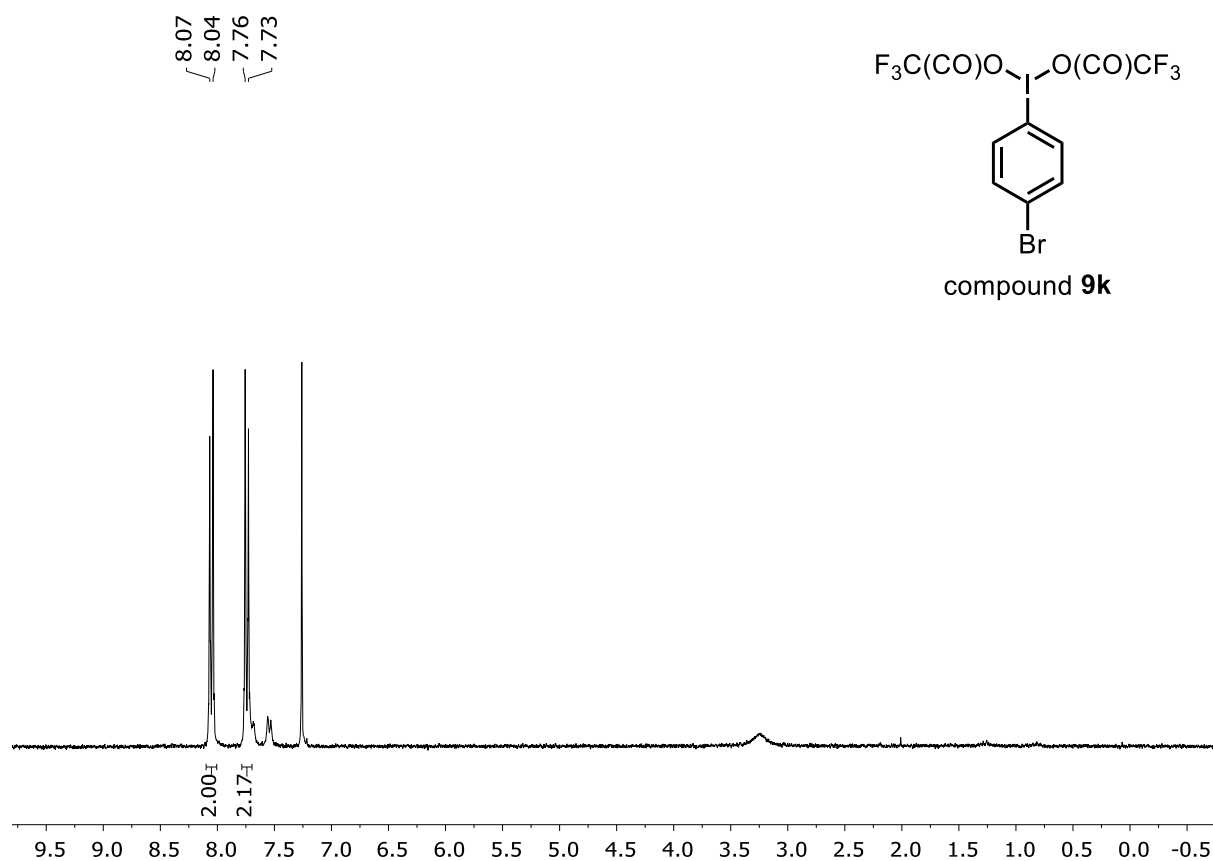

<sup>1</sup>H NMR (300 MHz, CDCl<sub>3</sub>) of compound **9k**.

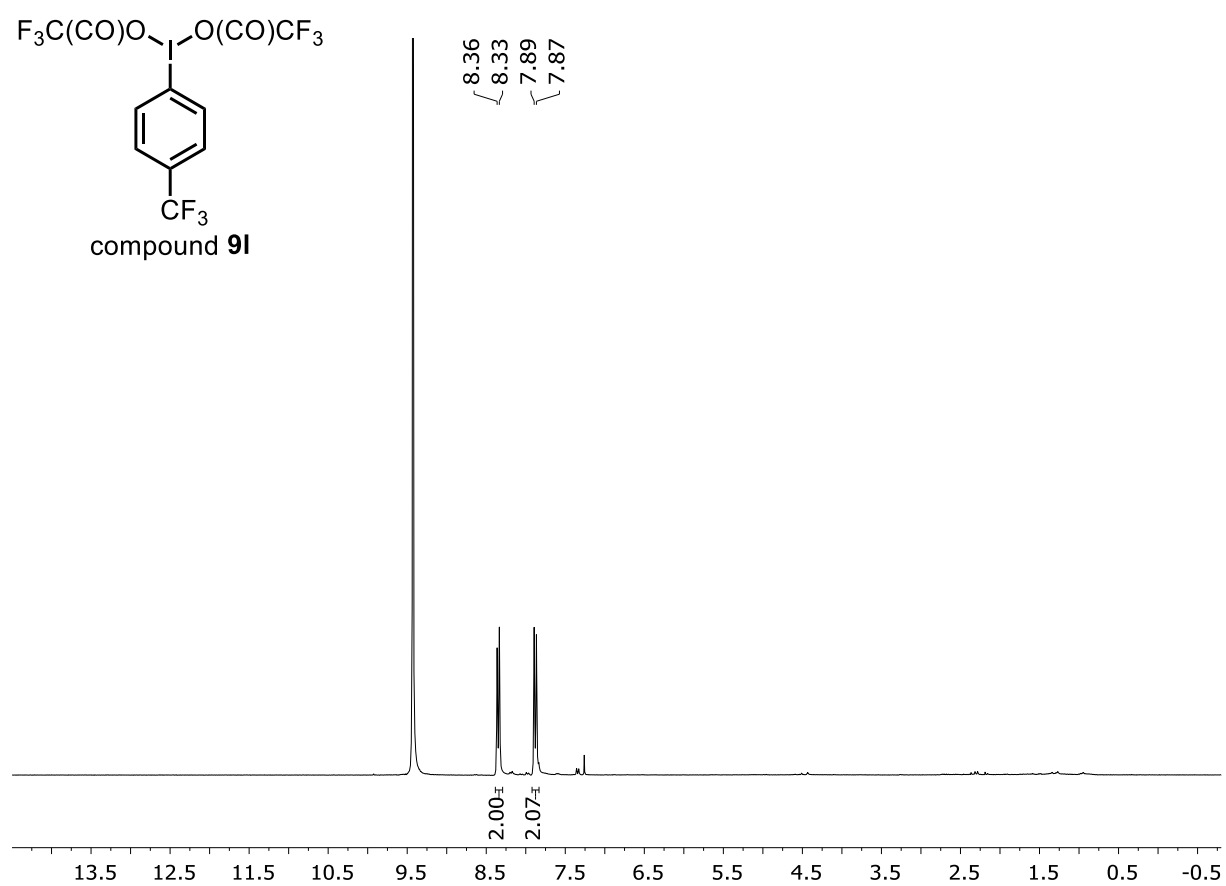

<sup>1</sup>H NMR (300 MHz, CDCl<sub>3</sub> + 1 vol% TFA) of compound **9l**.

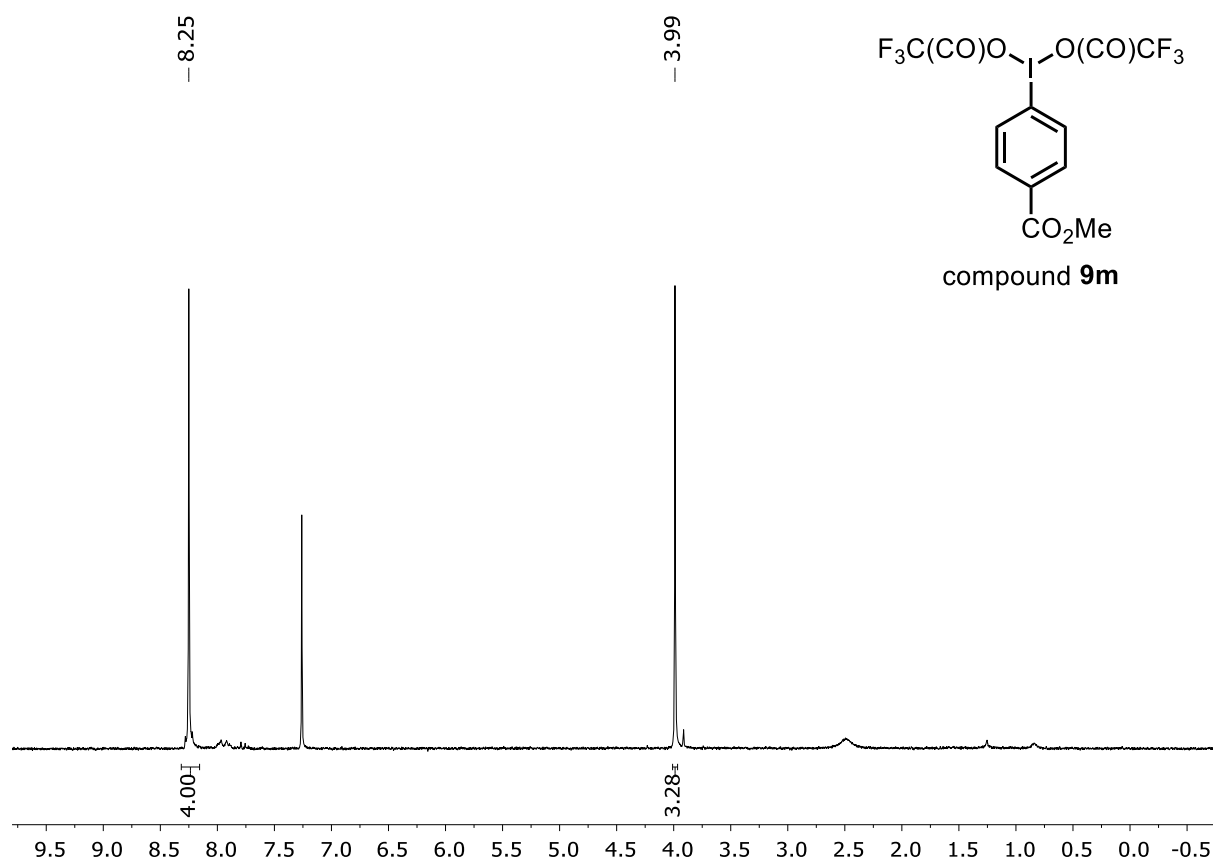

## 8. GLC of Compounds 2a, 8 and 2c–2m

### <Sample Information>

Sample Name : Compound\_2a  
 Sample ID : JUST-249  
 Data Filename : Compound\_2a.gcd  
 Method Filename : 50J.gcm  
 Batch Filename : Batch 1.gcb  
 Vial # : 1  
 Injection Volume : 1 uL  
 Date Acquired : 02.12.2019 15:40:30  
 Date Processed : 02.12.2019 17:52:26

Sample Type : Unknown compound **2a**  
 Acquired by : System Administrator  
 Processed by : System Administrator

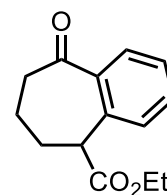

### <Chromatogram>

uV

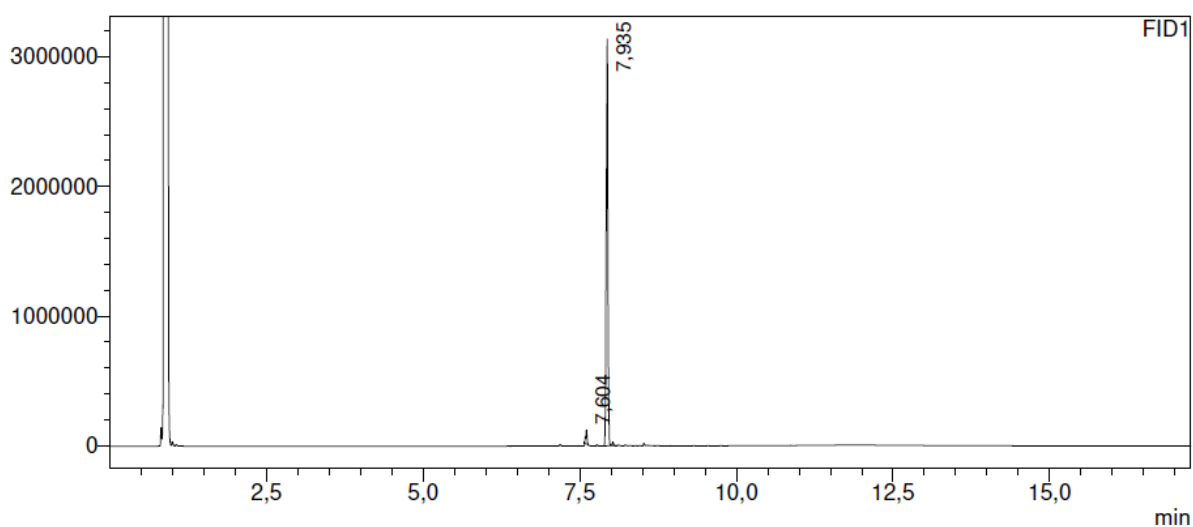

### <Peak Table>

FID1

| Peak# | Ret. Time | Area    | Height  | Conc.  | Unit | Mark | Name |
|-------|-----------|---------|---------|--------|------|------|------|
| 1     | 7,604     | 167257  | 104860  | 2,895  |      | M    |      |
| 2     | 7,935     | 5611077 | 3051080 | 97,105 |      | M    |      |
| Total |           | 5778335 | 3155940 |        |      |      |      |

### <Sample Information>

Sample Name : Compound\_6b  
Sample ID : JUST-234  
Data Filename : Compound\_6b.gcd  
Method Filename : 50J.gcm  
Batch Filename : Batch 1.gcb  
Vial # : 2  
Injection Volume : 1 uL  
Date Acquired : 02.12.2019 16:05:19  
Date Processed : 03.12.2019 10:09:08

Sample Type : Unknown  
Acquired by : System Administrator  
Processed by : System Administrator

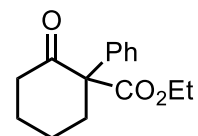

compound 8

### <Chromatogram>

uV

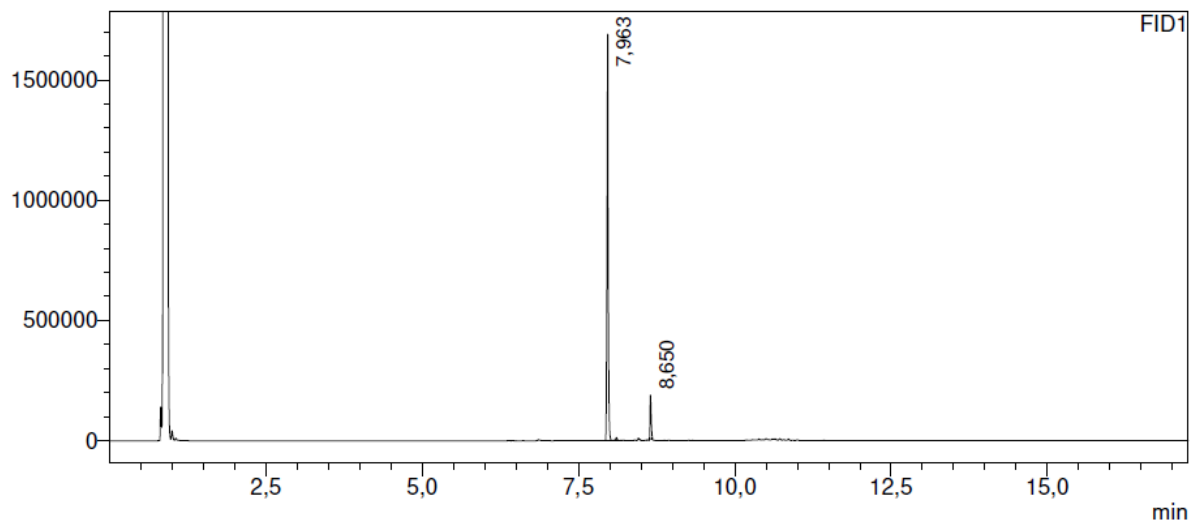

### <Peak Table>

FID1

| Peak# | Ret. Time | Area    | Height  | Conc.  | Unit | Mark | Name |
|-------|-----------|---------|---------|--------|------|------|------|
| 1     | 7,963     | 2484248 | 1624552 | 92,164 |      | M    |      |
| 2     | 8,650     | 211215  | 175139  | 7,836  |      | M    |      |
| Total |           | 2695463 | 1799691 |        |      |      |      |

### <Sample Information>

Sample Name : JUST-237-RG18  
Sample ID : JUST-237  
Data Filename : JUST-237-RG18.gcd  
Method Filename : 50J.gcm  
Batch Filename : Batch 1.gcb  
Vial # : 3  
Injection Volume : 1 uL  
Date Acquired : 04.12.2019 16:35:23  
Date Processed : 04.12.2019 18:21:35

Sample Type : Unknown  
Acquired by : System Administrator  
Processed by : System Administrator

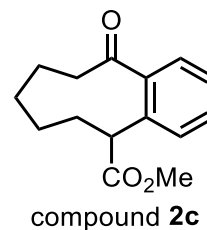

### <Chromatogram>

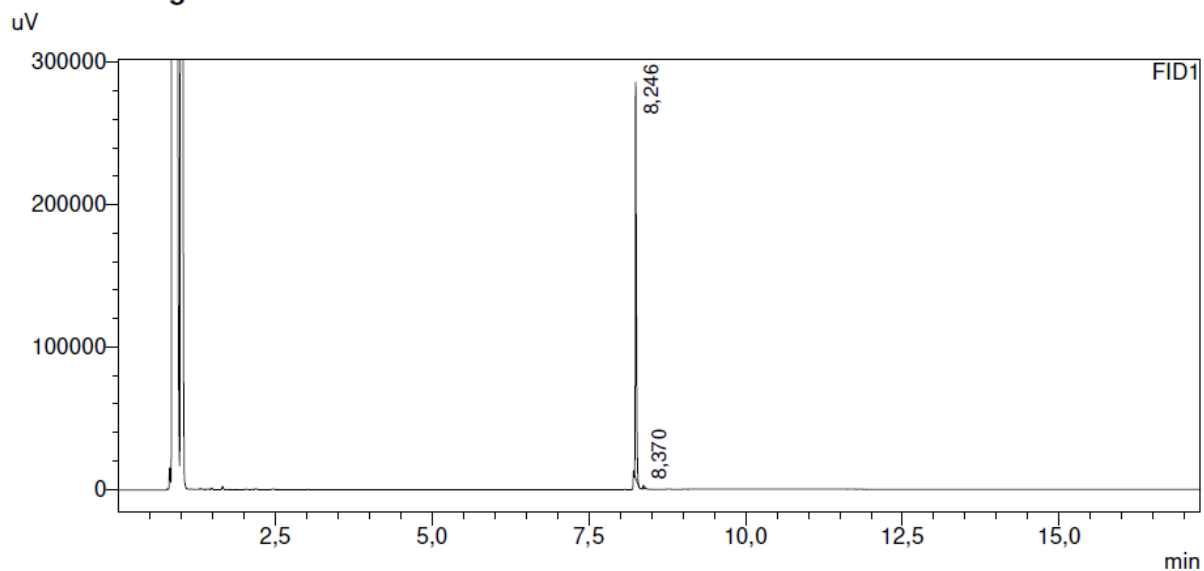

### <Peak Table>

FID1

| Peak# | Ret. Time | Area   | Height | Conc.  | Unit | Mark | Name |
|-------|-----------|--------|--------|--------|------|------|------|
| 1     | 8,246     | 341954 | 269429 | 98,866 |      | M    |      |
| 2     | 8,370     | 3923   | 2274   | 1,134  |      | M    |      |
| Total |           | 345877 | 271702 |        |      |      |      |



### <Sample Information>

Sample Name : Compound\_2d  
Sample ID : JUST-289  
Data Filename : Compound-2d.gcd  
Method Filename : 50J.gcm  
Batch Filename : Batch 1.gcb  
Vial # : 4  
Injection Volume : 1 uL  
Date Acquired : 02.12.2019 19:48:24  
Date Processed : 03.12.2019 10:07:17

Sample Type : Unknown  
Acquired by : System Administrator  
Processed by : System Administrator

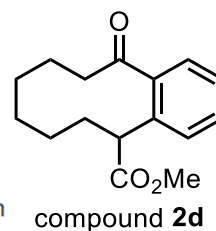

### <Chromatogram>

uV

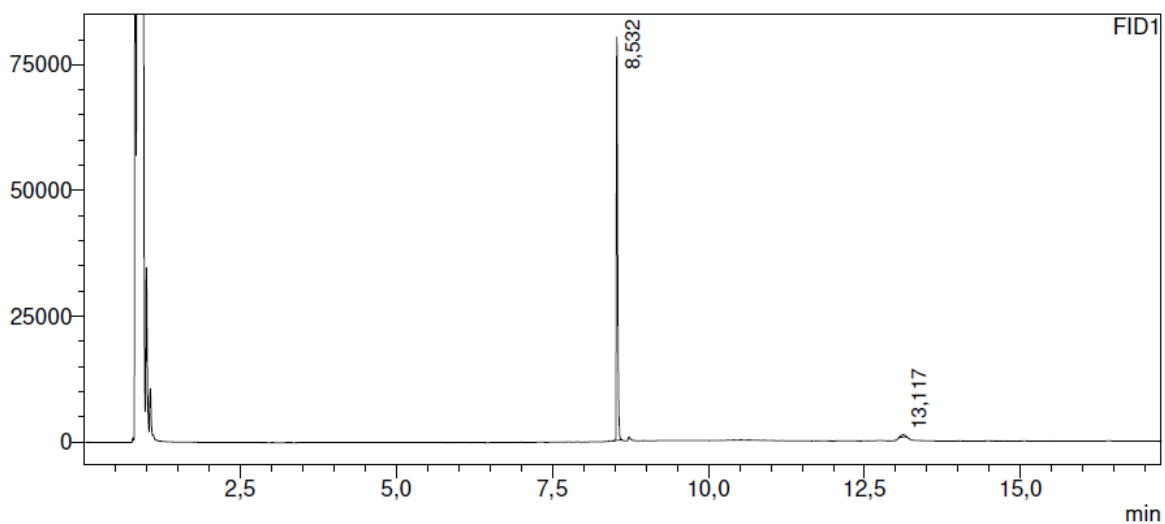

### <Peak Table>

FID1

| Peak# | Ret. Time | Area   | Height | Conc.  | Unit | Mark | Name |
|-------|-----------|--------|--------|--------|------|------|------|
| 1     | 8,532     | 108251 | 76567  | 98,275 |      | M    |      |
| 2     | 13,117    | 1900   | 429    | 1,725  |      | M    |      |
| Total |           | 110151 | 76997  |        |      |      |      |

### <Sample Information>

Sample Name : JUST-253-RG10  
Sample ID : JUST-253  
Data Filename : JUST-253-RG10.gcd  
Method Filename : 50J.gcm  
Batch Filename : Batch 1.gcb  
Vial # : 1  
Injection Volume : 1 uL  
Date Acquired : 04.12.2019 17:37:58  
Date Processed : 05.12.2019 11:59:04

Sample Type : Unknown compound **2f**  
Acquired by : System Administrator  
Processed by : System Administrator

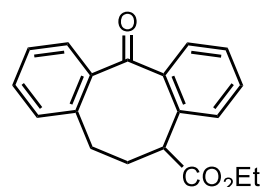

### <Chromatogram>

uV

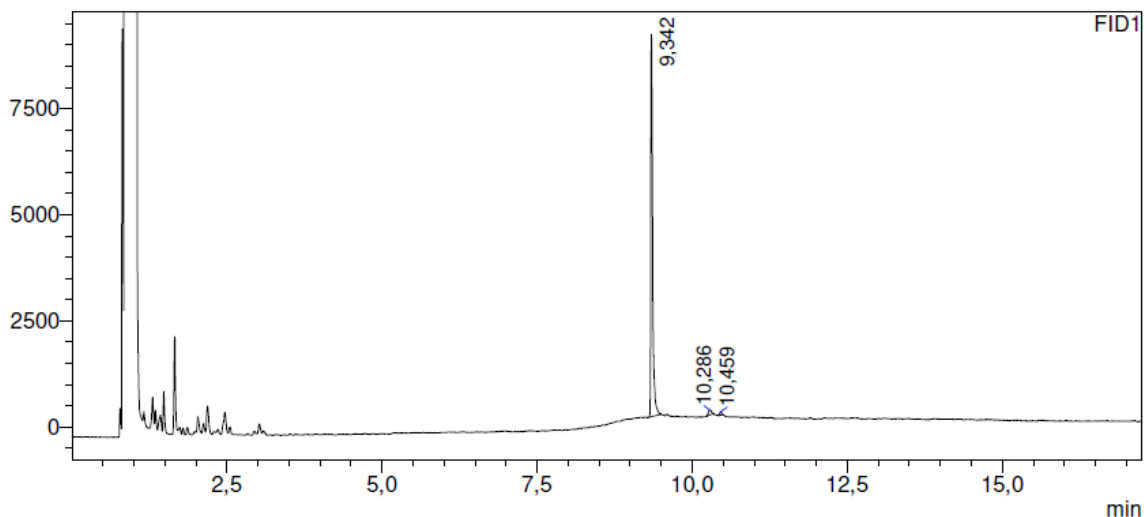

### <Peak Table>

FID1

| Peak# | Ret. Time | Area  | Height | Conc.  | Unit | Mark | Name |
|-------|-----------|-------|--------|--------|------|------|------|
| 1     | 9,342     | 18493 | 8925   | 97,024 |      | M    |      |
| 2     | 10,286    | 401   | 110    | 2,106  |      | M    |      |
| 3     | 10,459    | 166   | 78     | 0,870  |      | M    |      |
| Total |           | 19060 | 9112   |        |      |      |      |

<Sample Information>

Sample Name : Compound\_2g  
Sample ID : JUST-252  
Data Filename : Compound\_2g.gcd  
Method Filename : 50J.gcm  
Batch Filename : Batch 1.gcb  
Vial # : 1  
Injection Volume : 1 uL  
Date Acquired : 02.12.2019 18:33:03  
Date Processed : 03.12.2019 10:02:21

Sample Type : Unknown compound **2g**  
Acquired by : System Administrator  
Processed by : System Administrator

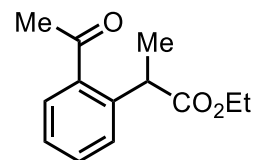

<Chromatogram>

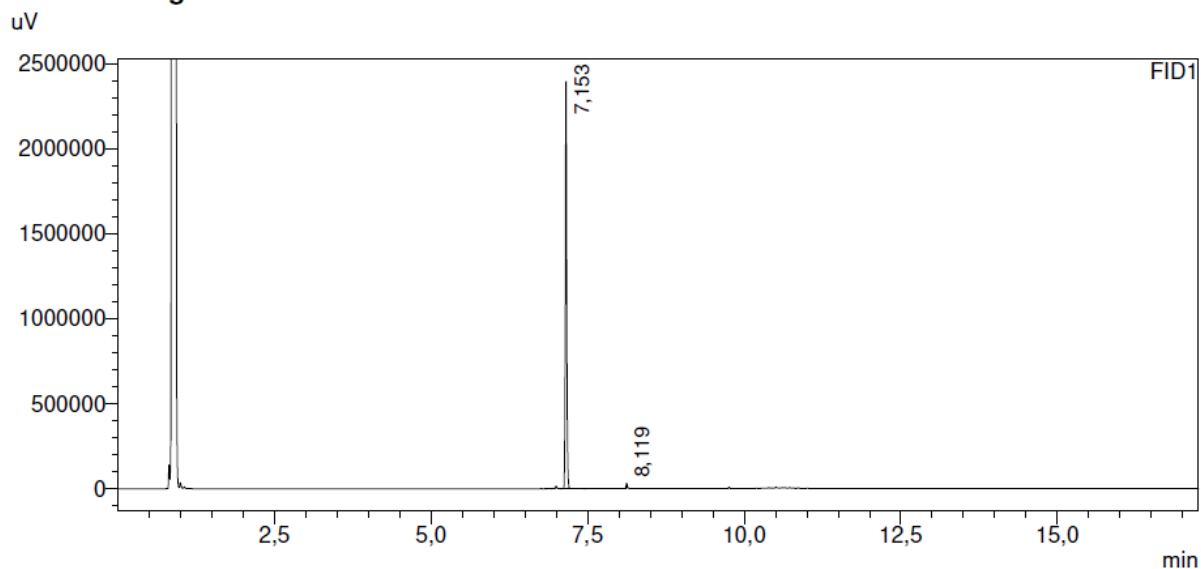

<Peak Table>

| Peak# | Ret. Time | Area    | Height  | Conc.  | Unit | Mark | Name |
|-------|-----------|---------|---------|--------|------|------|------|
| 1     | 7,153     | 3690295 | 2342168 | 99,188 |      | M    |      |
| 2     | 8,119     | 30216   | 27274   | 0,812  |      | M    |      |
| Total |           | 3720510 | 2369441 |        |      |      |      |

### <Sample Information>

Sample Name : Compound\_2h\_b  
Sample ID : JUST-288  
Data Filename : Compound-2h\_b.gcd  
Method Filename : 50J.gcm  
Batch Filename : Batch 1.gcb  
Vial # : 5  
Injection Volume : 1 uL  
Date Acquired : 02.12.2019 20:13:16  
Date Processed : 03.12.2019 10:05:29

Sample Type : Unknown compound **2h**  
Acquired by : System Administrator  
Processed by : System Administrator

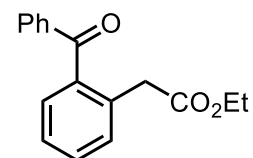

### <Chromatogram>

uV

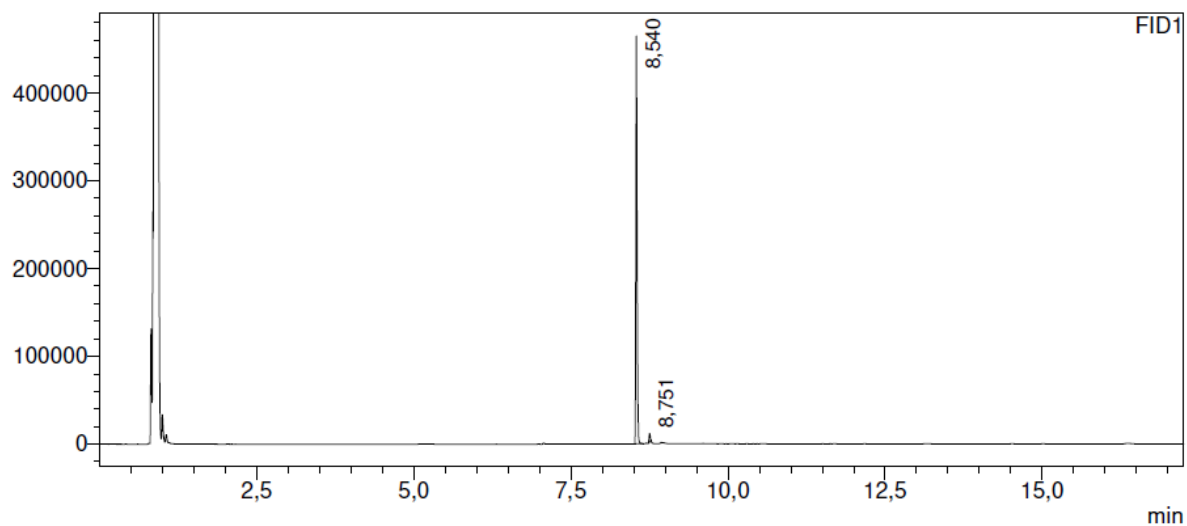

### <Peak Table>

FID1

| Peak# | Ret. Time | Area   | Height | Conc.  | Unit | Mark | Name |
|-------|-----------|--------|--------|--------|------|------|------|
| 1     | 8,540     | 597859 | 451529 | 98,087 |      | M    |      |
| 2     | 8,751     | 11661  | 9215   | 1,913  |      | M    |      |
| Total |           | 609520 | 460744 |        |      |      |      |

### <Sample Information>

Sample Name : Compound\_2i  
Sample ID : JUST-282  
Data Filename : Compound\_2i.gcd  
Method Filename : 50J.gcm  
Batch Filename : Batch 1.gcb  
Vial # : 1  
Injection Volume : 1 uL  
Date Acquired : 03.12.2019 10:03:00  
Date Processed : 03.12.2019 15:32:49

Sample Type : Unknown  
Acquired by : System Administrator  
Processed by : System Administrator

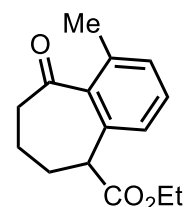

compound 2i

### <Chromatogram>

uV

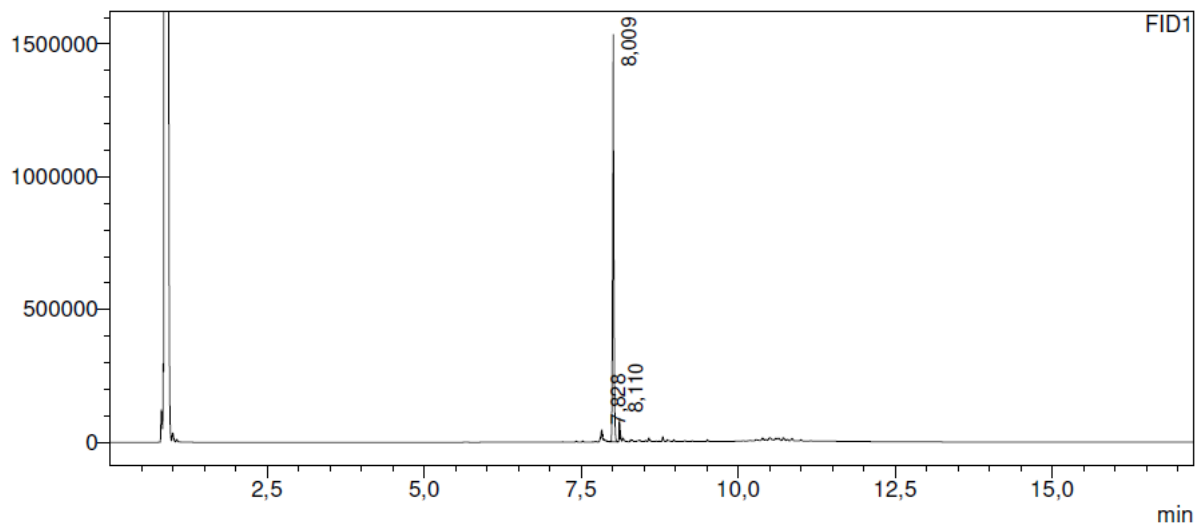

### <Peak Table>

FID1

| Peak# | Ret. Time | Area    | Height  | Conc.  | Unit | Mark | Name |
|-------|-----------|---------|---------|--------|------|------|------|
| 1     | 7,828     | 30027   | 23257   | 1,346  |      | M    |      |
| 2     | 8,009     | 2149537 | 1452914 | 96,323 |      | M    |      |
| 3     | 8,110     | 52035   | 60081   | 2,332  |      | M    |      |
| Total |           | 2231600 | 1536252 |        |      |      |      |

### <Sample Information>

Sample Name : Compound\_2j\_b  
Sample ID : JUST-282  
Data Filename : Compound\_2j\_b.gcd  
Method Filename : 50J.gcm  
Batch Filename : Batch 1.gcb  
Vial # : 3  
Injection Volume : 1 uL  
Date Acquired : 03.12.2019 10:52:34  
Date Processed : 03.12.2019 16:27:16

Sample Type : Unknown compound **2j**  
Acquired by : System Administrator  
Processed by : System Administrator

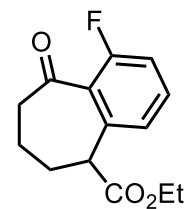

### <Chromatogram>

uV

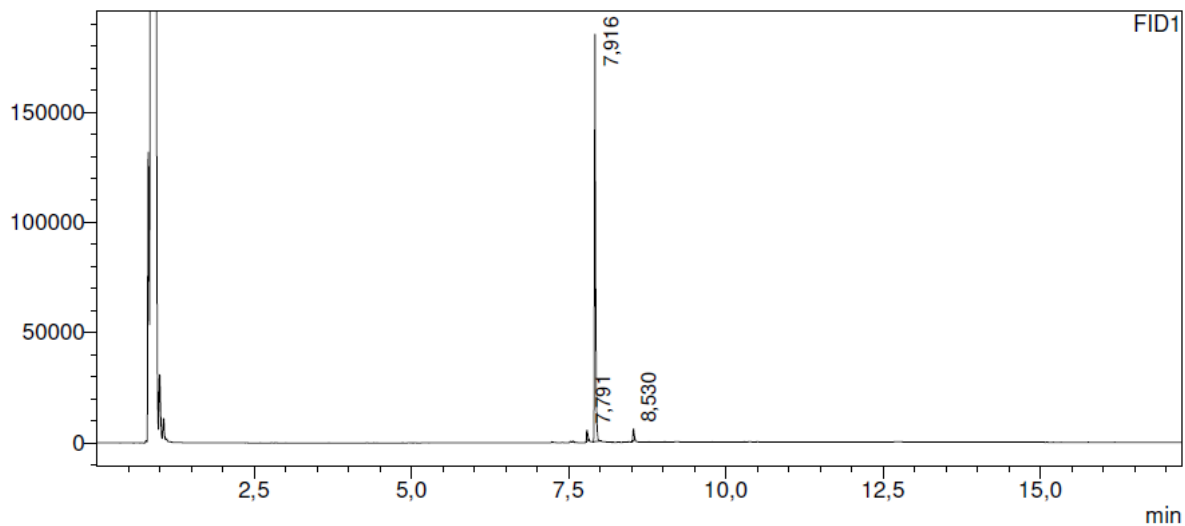

### <Peak Table>

FID1

| Peak# | Ret. Time | Area   | Height | Conc.  | Unit | Mark | Name |
|-------|-----------|--------|--------|--------|------|------|------|
| 1     | 7,791     | 6331   | 4839   | 2,516  |      | M    |      |
| 2     | 7,916     | 238708 | 178393 | 94,863 |      | M    |      |
| 3     | 8,530     | 6595   | 5236   | 2,621  |      | M    |      |
| Total |           | 251635 | 188468 |        |      |      |      |

### <Sample Information>

Sample Name : JUST-375-34-neu  
Sample ID :  
Data Filename : JUST-375-34-neu.gcd  
Method Filename : 50J.gcm  
Batch Filename : Batch 1.gcb  
Vial # : 22  
Injection Volume : 1 uL  
Date Acquired : 09.12.2019 12:06:59  
Date Processed : 09.12.2019 12:54:06

Sample Type : Unknown  
Acquired by : System Administrator  
Processed by : System Administrator

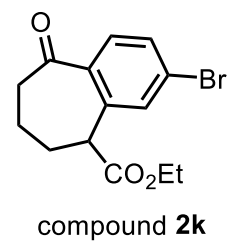

### <Chromatogram>

uV

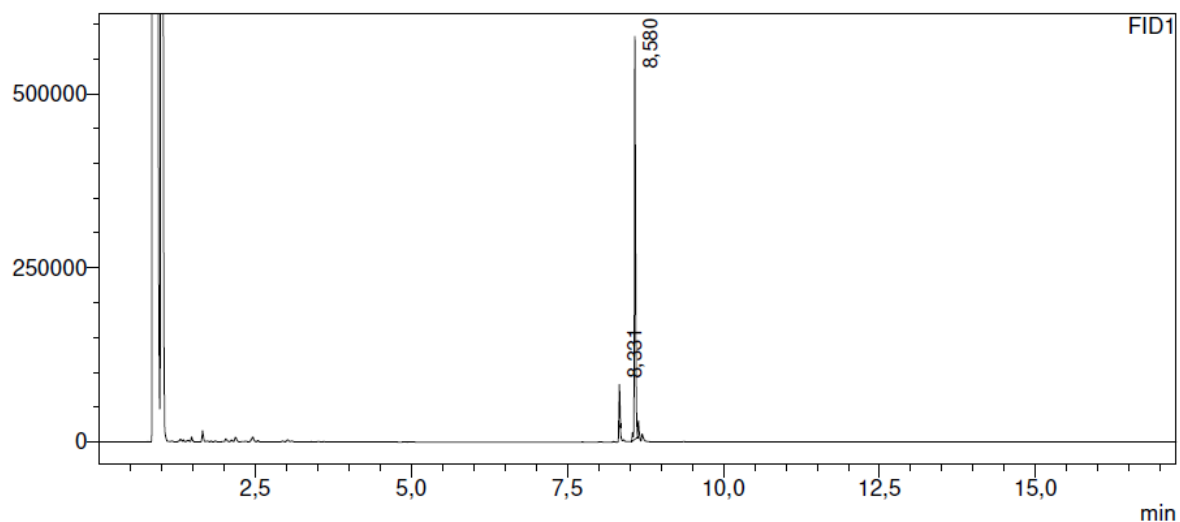

### <Peak Table>

FID1

| Peak# | Ret. Time | Area   | Height | Conc.  | Unit | Mark | Name |
|-------|-----------|--------|--------|--------|------|------|------|
| 1     | 8,331     | 56265  | 56686  | 6,884  |      | M    |      |
| 2     | 8,580     | 761071 | 569087 | 93,116 |      | M    |      |
| Total |           | 817335 | 625773 |        |      |      |      |

### <Sample Information>

Sample Name : JUST-286-RG12-neu  
Sample ID : JUST-286  
Data Filename : JUST-286-RG12-neu.gcd  
Method Filename : 50J.gcm  
Batch Filename : Batch 1.gcb  
Vial # : 5  
Injection Volume : 1 uL  
Date Acquired : 04.12.2019 19:17:29  
Date Processed : 05.12.2019 11:56:36

Sample Type : Unknown  
Acquired by : System Administrator  
Processed by : System Administrator

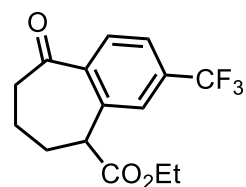

compound 21

### <Chromatogram>

uV

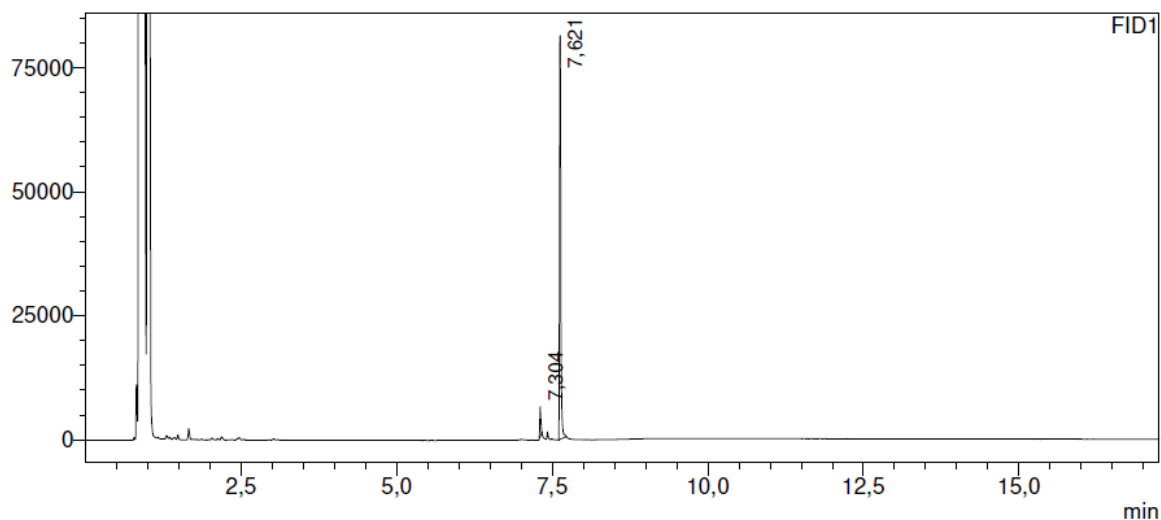

### <Peak Table>

FID1

| Peak# | Ret. Time | Area   | Height | Conc.  | Unit | Mark | Name |
|-------|-----------|--------|--------|--------|------|------|------|
| 1     | 7.304     | 7529   | 5647   | 6,216  |      | M    |      |
| 2     | 7.621     | 113599 | 77106  | 93,784 |      | M    |      |
| Total |           | 121128 | 82754  |        |      |      |      |



### <Sample Information>

Sample Name : Compound\_2m  
Sample ID : JUST-292  
Data Filename : Compound\_2m.gcd  
Method Filename : 50J.gcm  
Batch Filename : Batch 1.gcb  
Vial # : 3  
Injection Volume : 1 µL  
Date Acquired : 03.12.2019 16:23:10  
Date Processed : 04.12.2019 18:20:29

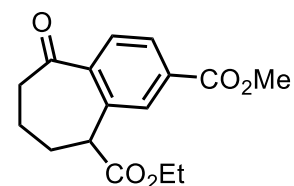

Sample Type : Unknown compound **2m**  
Acquired by : System Administrator  
Processed by : System Administrator

### <Chromatogram>

uV

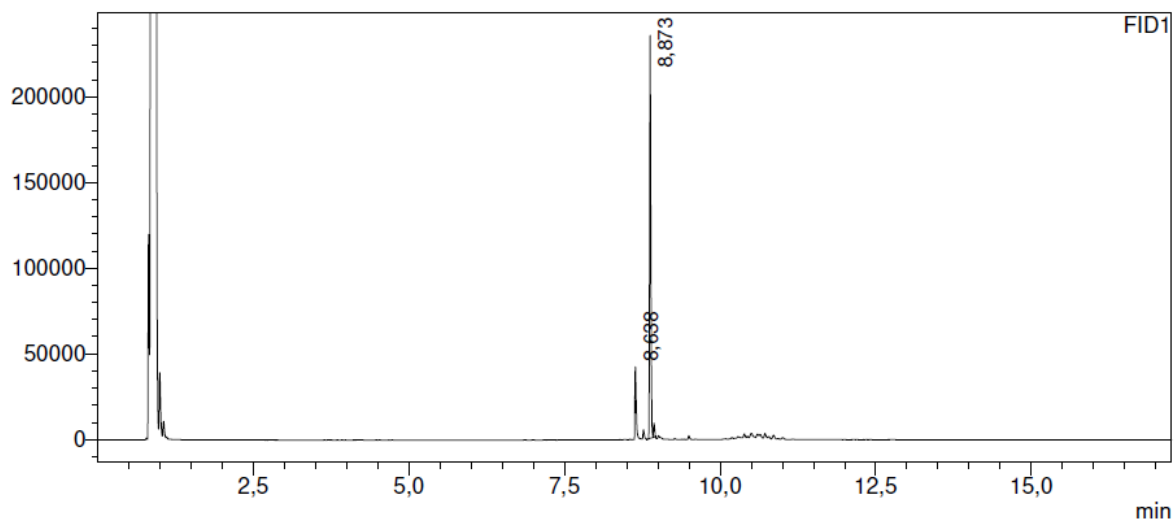

### <Peak Table>

FID1

| Peak# | Ret. Time | Area   | Height | Conc.  | Unit | Mark | Name |
|-------|-----------|--------|--------|--------|------|------|------|
| 1     | 8,638     | 20508  | 24399  | 6,243  |      | M    |      |
| 2     | 8,873     | 308000 | 227545 | 93,757 |      | M    |      |
| Total |           | 328508 | 251945 |        |      |      |      |
